# Supplementary material for: Absent phasing of respiratory and locomotor rhythms in running mice
Source: eLife. 2020 Dec 1;9:e61919. doi: 10.7554/eLife.61919 (PMC7707822; doi:10.7554/eLife.61919)
Supplement: Figure 1—source data 1. [file elife-61919-fig1-data1.xlsx]

## Sheet: Mobility rate
	mobility rate
	CTL	EMG-implanted
Animal 1	0.304899	0.285911
Animal2	0.260257	0.251334
Animal3	0.356383	0.22518
Animal4	0.240337	0.240313
Animal5	0.287139
Mean	0.289803	0.250684
SD	0.0446871	0.0258159

## Sheet: Speed
	speed (cm/s)
	CTL	EMG-implanted
Animal 1	21.6404	19.0991
Animal2	18.8512	20.8037
Animal3	22.6546	17.4662
Animal4	17.8646	17.3577
Animal5	20.174
Mean	20.2369	18.6817
SD	1.96006	1.62353

## Sheet: Distance
	distance
	CTL	EMG-implanted
Animal 1	45.6219	44.0542
Animal2	37.1174	42.1425
Animal3	55.5799	36.5181
Animal4	34.8573	36.758
Animal5	42.4676
Mean	43.1288	39.8682
SD	8.1584	3.81188
