# Supplementary material for: Absent phasing of respiratory and locomotor rhythms in running mice
Source: eLife. 2020 Dec 1;9:e61919. doi: 10.7554/eLife.61919 (PMC7707822; doi:10.7554/eLife.61919)
Supplement: Figure 2—figure supplement 1—source data 1. [file elife-61919-fig2-figsupp1-data1.xlsx]

## Sheet: Frequency
1min		5min		10min			Frequency
	Instant Freq		Instant Freq		Instant Freq			1min	5min	10min
Animal 1	10.3135	Animal 1	10.3926	Animal 1	9.68844		Animal 1	10.3135	10.3926	9.68844
Animal 2	11.2476	Animal 2	10.1554	Animal 2	11.0029		Animal 2	11.2476	10.1554	11.0029
Animal 3	11.8516	Animal 3	11.487	Animal 3	11.082		Animal 3	11.8516	11.487	11.082
Animal 4	10.7977	Animal 4	10.8867	Animal 4	10.2273		Animal 4	10.7977	10.8867	10.2273
Mean	11.0526	Mean	10.7304	Mean	10.5001		Mean	11.0526	10.7304	10.5001
St Dev	0.655162		0.589241		0.664478		St Dev	0.655162	0.589241	0.664478
individual instantaneous frequencies for each animal
Animal 1	10.6838	Animal 1	13.3153	Animal 1	11.3249
	12.3915		11.4419		8.68798
	11.4679		10.9655		9.43396
	9.98012		10.5263		11.9907
	8.84169		8.84956		6.48084
	9.09092		9.51459		10.5484
	8.21021		7.28845		9.58767
	10.4167		8.21041		8.75661
	11.0497		8.46		8.62069
	10.5485		7.94934		8.88118
	9.52381		9.90099		8.85722
	10.5707		10.449		7.88031
	11.3637		8.23735		8.09051
	10.5263		10.2778		8.68798
	9.61539		9.51461		9.49696
	10.2355		11.0126		9.65236
	10.8108		10.2466		11.1362
	9.40727		8.98466		8.71817
	11.2741		8.48188		9.07415
	10.7527		9.09091		10.3093
	7.05215		8.89692		8.71874
	8.02583		6.92997		10.0605
	8.11026		8.49622		9.17429
	6.58317		8.27115		6.86329
	8.82637		7.18395		11.1605
	8.92858		11.2109		10.2671
	7.23573		10.0102		10.9411
	6.73862		6.9251		9.64288
	9.72754		7.12257		9.66187
	9.89141		11.3763		9.67133
	9.5694		7.8309		9.46116
	9.47865		9.39864		9.36288
	9.78445		9.29355		8.91303
	9.70874		12.407		10.1724
	9.0581		14.1043		10.6383
	8.87318		12.7389		11.8201
	11.4814		12.6423		12.4854
	9.74644		10.8813		10.277
	11.0497		12.9032		9.38966
	12.5472		9.37214		8.54701
	13.8311		13.7361		8.72588
	11.0866		11.4546		9.69038
	11.5072		11.5341		9.21656
	12.1806		12.0482		13.5493
	12.5786		11.3508		12.2852
	12.2097		12.1803		10.0811
	11.6687		11.9048		9.30234
	7.27811		11.4943		8.82575
	11.4942		10.989		10.9654
	13.4773		12.9032		8.65804
	12.165		9.73699		9.1822
	12.2103		9.901		9.87197
	9.81368		13.2101	Animal 2	10.3518
	9.04977		12.8205		8.91303
	10.8696		12.6742		9.61539
	13.0207		13.3334		10.7527
	13.1234	Animal 2	7.8988		9.45138
	11.4413		10		9.79492
Animal 2	10.6494		8.01955		8.53958
	11.0013		8.41718		8.14301
	11.6411		9.57871		9.12463
	11.601		10.4167		9.3629
	12.9365		10.3845		9.25926
	12.3767		9.2166		8.34745
	13.4765		7.72199		10.2671
	10.3951		10.0598		9.84238
	11.1986		9.94095		10.07
	11.2994		9.86135		8.48188
	12.0914		7.89295		7.89877
	12.8702		10.9646		8.87348
	12.3		10.2671		8.9442
	12.1512		9.53303		9.32875
	11.4286		9.68009		9.27603
	11.8201		10.4065		8.95293
	11.7093		10.277		12.3612
	11.9191		10		11.0621
	10.8696		8.69562		12.2547
	11.0497		10.7302		12.3154
	9.38967		8.5033		12.6102
	12.2553		9.09928		11.3124
	11.8623		10.6609		11.5336
	11.2865		10.1214		11.6825
	10.8227		10.9052		10.3732
	11.8904		11.2109		12.1656
	10.9533		10.6952		12.3
	12.6582		11.1111		12.2254
	11.3249		11.6549		11.7367
	11.1981		8.92081		10.1628
	11.274		10.9645		12.0047
	11.2865		9.76577		11.468
	11.8766		10.741		11.0497
	9.31112		9.88151		12.5626
	11.5472		9.59699		12.24
	11.3505		13.0719		13.5687
	11.3767		10.1214		12.5159
	11.468		10.225		8.43159
	10.9407		9.25926		11.468
	11.1986		9.25069		10.5043
	11.3505		9.92065		10.8342
	10.741		10.3734		10.4601
	10.6383		9.33706		11.7647
	10.6048		13.1752		10.4823
	11.6142		9.58769		13.02
	13.1228		10.2041		12.9032
	11.0746		9.83286		13.245
	9.57872		11.534		12.804
	10.8926		12.1506		14.9701
	11.8629		11.0498		11.5875
	11.3768		11.3122		12.0048
	9.89104		12.4534		12.0336
	13.2794		9.23357		14.2654
	8.54017		10.7411		12.7065
	8.77192		11.1483		13.3868
	9.56939		11.236		12.2101
	12.0482	Animal 3	11.6687	Animal 3	12.3151
	10.4927		12.3302		11.4811
	9.37249		9.97001		13.4408
	9.97972		10.7297		11.4811
Animal 3	11.9473		13.55		12.7389
	12.5159		10.1218		11.8065
	13.8121		10.3093		11.0863
	12.755		10.4931		11.3897
	11.0011		11.4808		13.9468
	10.7297		13.1579		11.9475
	11.9048		12.9535		11.8065
	11.574		11.1981		12.0772
	12.1066		10.9173		11.7647
	11.236		10.7064		13.4228
	10.5595		11.7788		10.1318
	10.7297		11.3636		9.83273
	11.574		11.4809		11.8766
	12.1509		10.6498		11.5874
	9.56937		10.6158		11.9189
	12.0627		12.1951		11.1236
	11.3765		12.27		10.7642
	12.1358		9.7561		12.2549
	10.8578		9.61539		10.1114
	10.8696		11.0741		13.6621
	14.6198		10.1318		13.1403
	11.9189		12.3		12.7554
	12.8205		9.45173		10.5925
	11.6959		11.6554		11.7788
	11.1605		10.7871		13.1755
	13.0719		11.1484		12.2394
	12.1362		7.75194		8.96861
	10.8576		10.6498		10.4065
	12.5159		13.6986		10.3093
	10.1214		10.929		10.2457
	13.0207		10.4931		10.8456
	11.1484		13.106		11.2865
	13.7745		11.9475		10.1427
	9.19112		12.092		9.0658
	11.1732		11.5206		9.30232
	11.9187		12.0482		10.4824
	11.2994		13.3514		12.3006
	12.5318		13.3508		10.449
	12.5		10.741		10.1523
	13.7546		10.8346		11.2231
	13.0041		11.2104		10.7994
	13.3871		10.3526		10.2667
	12.5152		12.5147		9.85221
	11.601		10.9777		10.1422
	12.6902		19.5301		10.3413
	11.0126		12.9371		10.9767
	13.756		10.9402		11.1859
	11.025		11.5879		13.6424
	13.4045		10.5263		8.94448
	10.9411		8.96045		10.8108
	13.8693		10.8346		8.20355
	10.929		14.8578		9.12398
	10.7418		12.0199		10.2457
	11.3506		12.4224		10.5155
	12.1951		10.5593		8.96047
	13.5321		11.3385		8.6431
	12.18		11.5201		10.515
	13.4228		11.0497	Animal 4	11.7786
	7.77595		12.7719		10.9649
	10.741		9.88113		13.1926
	11.3767	Animal 4	10.7759		9.53289
	12.3767		11.6279		9.56938
	12.2841		8.86526		9.48767
	11.4818		10.5485		10.9649
	11.7507		10.288		9.86193
	10.1114		9.21657		10.0402
	11.9048		11.1234		11.1483
Animal 4	9.61539		10.5485		10.9051
	9.56009		13.9276		11.1857
	10.2985		11.236		10.3627
	8.68798		10.4712		11.4679
	11.4685		10.1626		9.39849
	12.3302		12.7064		10.2987
	11.6142		11.0988		11.0619
	11.1732		9.06621		9.66184
	10.4277		11.4943		11.9617
	12.2699		13.0719		10.0604
	11.6142		11.3121		9.34579
	10.5489		12.3152		9.28512
	9.43396		10.8343		10.2985
	9.07415		10.661		10.5043
	11.8343		11.976		10.2882
	9.59664		11.3249		8.25753
	10.2253		11.9475		8.74884
	9.91094		11.2483		8.77975
	10.0298		11.1111		10.4824
	12.18		11.3894		11.6411
	11.2865		15.2672		11.7232
	10.02		12.3917		7.94932
	10.8936		9.53303		7.17871
	10.9768		10.8811		10.0098
	11.3249		11.5743		9.45208
	12.3154		11.0013		8.57621
	12.1362		11.025		9.08253
	13.3863		11.338		13.0552
	11.5743		11.5341		11.6682
	11.8766		10.5043		10.8465
	11.8766		11.0255		11.5607
	11.7647		10.8931		9.28478
	12.8365		10.764		9.57868
	11.0741		10.582		9.3281
	8.97678		10.3522		10.0914
	10.8342		12.3148		10.101
	11.6011		11.1859		10.989
	10.0704		10.3518		10.8807
	13.7745		11.0621		10.0914
	12.2394		11.4685		10.183
	12.8045		11.086		9.43397
	11.4153		9.44303		9.79413
	8.30562		10.5593		10.7302
	10.3843		10.4823		9.78442
	7.56993		7.41858		10.1114
	9.30233		10.101		10.5707
	10.2355		10.3947		10.3627
	9.30233		8.60562
	8.2034		10.2564
	11.6011		9.12461
	9.46061		11.976
	8.96861		10.3627
	9.71834		9.11549
	11.5471		9.7658
	10.6838
	11.8065
	11.3765
	9.61539
	11.9903
	10.6725
	10.9648

## Sheet: Normalized Amplitude
CTL		1min			5min			10min				Norm. Amplitude
	Mean Amp.		% CTRL Ampl	Mean Amp.		% CTRL Ampl	Mean Amp.		% CTRL Ampl	Mean Amp.			1min	5min	10min
Animal 1	0.3059	Animal 1	185.621	0.567813	Animal 1	187.176	0.572571	Animal 1	194.315	0.594408		Animal 1	185.621	187.176	194.315
Animal 2	0.371954	Animal 2	167.34	0.622428	Animal 2	159.513	0.593315	Animal 2	194.307	0.722731		Animal 2	167.34	159.513	194.307
Animal 3	0.2348	Animal 3	165.635	0.388911	Animal 3	174.936	0.410751	Animal 3	165.69	0.389041		Animal 3	165.635	174.936	165.69
Animal 4	0.286397	Animal 4	140.297	0.401806	Animal 4	140.15	0.401384	Animal 4	140.15	0.394628		Animal 4	140.297	140.15	140.15
Mean		Mean	164.723		Mean	165.444		Mean	173.615			Mean	164.723	165.444	173.615
St Dev		St Dev	18.6282			20.3089			26.0726			St Dev	18.6282	20.3089	26.0726
Individual values for each animal
Animal 1	0.299353		Animal 1	0.490828		Animal 1	0.643946		Animal 1	0.681785
	0.358325			0.715022			0.732913			0.604774
	0.42586			0.492436			0.706503			0.502027
	0.35547			0.400857			0.405018			0.741667
	0.297496			0.451577			0.365223			0.469951
	0.303588			0.481995			0.507472			0.641777
	0.284919			0.614363			0.545182			0.796117
	0.32163			0.585879			0.469179			0.637136
				0.615111			0.424595			0.442561
				0.729747			0.581024			0.478796
	0.280333			0.502714			0.530112			0.453953
	0.269084			0.534867			0.583511			0.510219
				0.755063			0.571872			0.542232
	0.301938			0.545498			0.477919			0.438302
	0.243677			0.70725			0.621554			0.492758
	0.285707			0.466811			0.366658			0.602996
	0.255214			0.697369			0.498325			0.653053
Animal 2	0.332343			0.366155			0.528769			0.555812
	0.443924			0.714382			0.466275			0.61162
	0.417849			0.538798			0.441658			0.689051
	0.331417			0.569885			0.466722			0.541985
	0.323904			0.427752			0.462893			0.637682
	0.32327			0.532473			0.505029			0.684434
	0.360904			0.549382			0.607286			0.552647
	0.332401			0.473919			0.459811			0.707875
	0.415073			0.416897			0.572166			0.632602
	0.353553			0.579456			0.480288			0.592618
	0.284444			0.361458			0.466027			0.531109
	0.268587			0.387154			0.542778			0.656632
	0.361993			0.598261			0.659562			0.487323
	0.441285			0.561858			0.488376			0.667516
	0.50999			0.471488			0.629287			0.582797
	0.4066			0.609639			0.624687			0.639276
	0.399615			0.776059			0.608869			0.818514
	0.341376			0.555152			0.496528			0.622259
	0.418597			0.427748			0.62092			0.469185
Animal 3	0.310185			0.620247			0.749408			0.720062
	0.234329			0.654014			0.662782			0.717775
	0.307147			0.664969			0.796392			0.440898
	0.207594			0.603152			0.474964			0.561463
	0.27639			0.597659			0.558429			0.543775
	0.238053			0.650685			0.757872			0.68746
	0.285446			0.651671			0.530457			0.493591
	0.262688			0.555546			0.686564			0.631032
	0.222533			0.584154			0.479841			0.558569
	0.27012			0.545503			0.647308			0.70439
	0.179548			0.770202			0.540129			0.54304
	0.185238			0.521984			0.363415			0.702634
	0.311809			0.53714			0.579666			0.567958
	0.215056			0.54529			0.712889			0.539727
	0.283912			0.566773			0.793821			0.539128
	0.154303			0.649748			0.845552			0.586651
	0.285491			0.59054			0.615621		Animal 2	0.615553
	0.223308			0.683948			0.753373			0.532351
	0.176823			0.553257			0.649287			0.51712
	0.17225			0.520078			0.707234			0.571228
	0.203528			0.648682		Animal 2	0.57445			0.524001
	0.159858			0.512638			0.319142			0.576319
Animal 4	0.32073		Animal 2	0.726947			0.396685			0.542198
	0.259505			0.563979			0.455241			0.702499
	0.321834			0.757126			0.569999			0.688611
	0.307237			0.432995			0.500471			0.367919
	0.214394			0.777111			0.61113			0.542156
	0.24109			0.605271			0.625361			0.501179
	0.286367			0.87986			0.638931			0.485887
	0.246465			0.742924			0.492809			0.564208
	0.246482			0.56609			0.671133			0.552727
	0.206365			0.660857			0.492021			0.42151
	0.200306			0.584647			0.513262			0.420323
	0.399514			0.788283			0.602682			0.755862
	0.349124			0.651731			0.637804			0.772424
	0.247099			0.677478			0.690544			0.404885
	0.297818			0.765781			0.609641			0.58198
	0.286081			1.02751			0.550587			0.36702
	0.302061			0.655535			0.586496			0.678071
	0.300778			0.69099			0.604398			0.703148
	0.350181			0.766411			0.564811			0.780052
	0.28401			0.710038			0.564608			0.94682
	0.38165			0.515331			0.666863			0.91686
	0.25164			0.673866			0.412294			1.0183
				0.686361			0.537432			0.796301
				0.420678			1.09723			0.90001
				0.756654			0.552578			1.01132
				0.602197			0.91323			0.688182
				0.511508			0.641043			0.8937
				0.649633			0.551163			0.81962
				0.96141			0.587669			0.626557
				0.512883			0.647001			0.815422
				0.668046			0.550261			0.760303
				0.657546			0.810768			0.89842
				0.757283			0.485991			1.01591
				0.456016			0.654789			0.98657
				0.614615			0.43233			0.839307
				0.480305			0.424992			0.86937
				0.740882			0.407684			1.15431
				0.507247			0.92266			0.691422
				0.718559			0.654968			0.82252
				0.593395			0.454029			0.790407
				0.824743			0.550137			0.814468
				0.758117			0.586969			0.687244
				0.756252			0.489963			0.713109
				0.505307			0.565768			0.732083
				0.360627			0.568094			0.979
				0.538345			0.509575			0.791964
				0.559474			1.05726			0.672754
				0.427086			0.476024			0.754198
				0.406055			0.705638			0.87848
				0.426871			0.415639			0.725613
				0.529589			0.686362			0.753072
				0.641147			0.580109			0.72089
				0.55235			0.525301			0.712472
				0.472742			0.6571			0.759894
				0.457124			0.765768			0.738857
				0.529848			0.595407			0.94438
				0.544067		Animal 3	0.532655		Animal 3	0.359331
				0.447416			0.408554			0.491317
				0.588143			0.508421			0.513379
				0.504377			0.342399			0.369761
			Animal 3	0.402014			0.393415			0.67008
				0.201441			0.377679			0.392879
				0.34957			0.351157			0.453831
				0.287738			0.351452			0.407237
				0.315486			0.467114			0.425874
				0.382093			0.482643			0.362025
				0.25113			0.440797			0.35504
				0.518522			0.393885			0.418836
				0.366868			0.294125			0.322215
				0.323401			0.286868			0.430238
				0.456826			0.357724			0.488062
				0.390295			0.387067			0.543942
				0.313111			0.412251			0.49864
				0.40998			0.438254			0.482647
				0.306056			0.346091			0.381519
				0.363523			0.311339			0.423143
				0.217088			0.4893			0.414746
				0.472642			0.437736			0.447483
				0.235529			0.386703			0.47273
				0.379772			0.50398			0.539368
				0.32441			0.269007			0.269194
				0.437401			0.275503			0.410855
				0.558319			0.337727			0.403562
				0.422169			0.45487			0.353366
				0.398594			0.32939			0.463551
				0.441316			0.375841			0.275696
				0.433371			0.49544			0.326696
				0.318607			0.309132			0.318132
				0.320976			0.232835			0.407251
				0.438223			0.33392			0.401541
				0.451546			0.351982			0.357297
				0.319777			0.582425			0.356311
				0.431198			0.346101			0.51072
				0.391467			0.349387			0.450539
				0.278885			0.468353			0.355307
				0.507632			0.430315			0.292474
				0.309952			0.659302			0.341418
				0.598313			0.333651			0.270943
				0.494885			0.24014			0.338161
				0.531126			0.422035			0.287874
				0.365539			0.621033			0.327355
				0.42712			0.406015			0.362018
				0.387167			0.431311			0.329416
				0.388534			0.472119			0.222097
				0.344053			0.196114			0.408318
				0.471189			0.493812			0.50014
				0.425606			0.434692			0.381524
				0.370631			0.498691			0.355732
				0.368754			0.506917			0.440954
				0.365758			0.37012			0.40613
				0.443743			0.274623			0.228042
				0.474143			0.607358			0.25403
				0.317246			0.491047			0.282284
				0.485459			0.584011			0.393902
				0.450739			0.323232			0.370713
				0.314143			0.341189			0.306265
				0.476744			0.617097			0.30735
				0.37022			0.515382		Animal 4	0.389677
				0.334177			0.400512			0.443436
				0.430201			0.40386			0.385834
				0.323148		Animal 4	0.417313			0.394248
				0.536922			0.486179			0.459164
				0.351924			0.315066			0.378049
				0.327198			0.418953			0.379231
				0.276494			0.431328			0.243146
				0.462601			0.261391			0.273113
				0.416316			0.44381			0.571794
			Animal 4	0.390056			0.493585			0.461948
				0.314572			0.630505			0.418658
				0.288424			0.355645			0.456938
				0.360604			0.363383			0.337576
				0.497092			0.298529			0.325193
				0.40728			0.500206			0.325178
				0.341559			0.433645			0.295077
				0.384289			0.221338			0.266625
				0.39144			0.364649			0.305258
				0.340182			0.283806			0.321201
				0.422984			0.390401			0.412192
				0.453871			0.349809			0.355404
				0.34709			0.311109			0.409264
				0.379145			0.387184			0.4964
				0.343691			0.419386			0.316744
				0.414347			0.485451			0.364543
				0.477501			0.489447			0.336021
				0.508513			0.33025			0.342645
				0.349129			0.591429			0.375467
				0.411315			0.375869			0.345853
				0.432846			0.331032			0.519506
				0.400593			0.298077			0.322866
				0.474554			0.569806			0.309341
				0.487807			0.320757			0.387079
				0.44248			0.374466			0.400169
				0.453634			0.336968			0.421661
				0.415139			0.489108			0.313268
				0.409123			0.405345			0.337362
				0.603321			0.547735			0.420825
				0.504066			0.331627			0.482368
				0.378909			0.478271			0.325344
				0.463619			0.360305			0.413796
				0.40839			0.53132			0.408773
				0.347452			0.371711			0.340698
				0.273832			0.386307			0.376788
				0.4626			0.321346			0.448284
				0.429161			0.536464			0.453632
				0.270545			0.49132			0.470231
				0.478682			0.37477			0.426369
				0.387204			0.33815			0.444544
				0.347814			0.456331			0.31259
				0.371862			0.42388			0.47817
				0.293652			0.446423			0.553796
				0.348317			0.310708			0.556565
				0.262394			0.444056			0.451129
				0.265027			0.418212			0.425901
				0.341821			0.432322			0.506849
				0.43905			0.331566
				0.2869			0.269736
				0.494255			0.444221
				0.334846			0.391628
				0.491327			0.325903
				0.371794			0.330313
				0.394756			0.414586
				0.502803
				0.437886
				0.467308
				0.489648
				0.482653
				0.456109
				0.282897
