# Supplementary material for: Absent phasing of respiratory and locomotor rhythms in running mice
Source: eLife. 2020 Dec 1;9:e61919. doi: 10.7554/eLife.61919 (PMC7707822; doi:10.7554/eLife.61919)
Supplement: Figure 2—source data 1. [file elife-61919-fig2-data1.xlsx]

## Sheet: Flat Frequency
CTL		15cm/s		25cm/s		40cm/s		50cm/s		REC			Same data recapitulated for making the graph
														CTL	15cm/s	25cm/s	40cm/s	50cm/s	REC
Average frequencies for each animal (bursts/sec)
Animal 1	3.67558	Animal 1	10.6838	Animal 1	8.66507	Animal 1	9.69504	Animal 1	9.20924	Animal 1	4.26135		Animal 1	3.67558	10.6838	8.66507	9.69504	9.20924	4.26135
Animal 2	5.01018	Animal 2	11.2939	Animal 2	9.32837	Animal 2	10.6965	Animal 2	9.30773	Animal 2	5.43057		Animal 2	5.01018	11.2939	9.32837	10.6965	9.30773	5.43057
Animal 3	5.54385	Animal 3	unstable	Animal 3	10.843	Animal 3	9.86245	Animal 3	10.694	Animal 3	3.74343		Animal 3	5.54385		10.843	9.86245	10.694	3.74343
Animal 4	4.5339	Animal 4	11.0456	Animal 4	10.4004	Animal 4	10.1686	Animal 4	10.7421	Animal 4	5.17693		Animal 4	4.5339	11.0456	10.4004	10.1686	10.7421	5.17693
Animal 5	3.97333	Animal 5	11.5619	Animal 5	10.7371	Animal 5	10.8717	Animal 5	10.0292	Animal 5	3.90476		Animal 5	3.97333	11.5619	10.7371	10.8717	10.0292	3.90476
Animal 6	4.59578	Animal 6	unstable	Animal 6	11.0219	Animal 6	11.5857	Animal 6	11.2532	Animal 6	4.27241		Animal 6	4.59578		11.0219	11.5857	11.2532	4.27241
Animal 7	4.55074	Animal 7	unstable	Animal 7	10.8746	Animal 7	11.3031	Animal 7	10.7635	Animal 7	5.18471		Animal 7	4.55074		10.8746	11.3031	10.7635	5.18471
Mean	4.55477	Mean	11.1463	Mean	10.2672	Mean	10.5976	Mean	10.2856	Mean	4.56774		Mean	4.55477	11.1463	10.2672	10.5976	10.2856	4.56774
St Dev	0.618987	St Dev	0.373501	St Dev	0.908923		0.71857		0.78744		0.682688		St Dev	0.618987	0.373501	0.908923	0.71857	0.78744	0.682688
Individual values of instantaneous frequencies for each animal
Animal 1	5.33903	Animal 1	10.4385	Animal 1	9.25926	Animal 1	6.27359	Animal 1	9.9404	Animal 1	6.08273
	6.84463		9.09915		8.6431		8.66548		8.66548		3.64564
	4.94315		10.3734		8.97679		10.2879		7.71015		6.7522
	5.37924		12.21		7.06207		9.7753		9.09915		4.4964
	4.40917		11.601		8		10.4931		10.2987		2.62398
	2.23214		10.4383		10.1318		9.38967		8.71073		4.32713
	2.43487		11.3765		9.02521		7.23071		8.5984		6.09014
	2.67809		10.0102		6.60065		10.5151		8.21026		5.39957
	1.98807		9.53284		9.56938		8.80286		9.08268		2.67738
	5.51876		6.92043		8.71847		7.62201		7.9808		2.55102
	2.21877		11.9048		8.26445		10.2987		10.7297		4.25532
	3.1746		12.3305		8.99288		7.86157		7.96169		2.57931
	2.93513		9.0171		9.26764		12.8701		8.96861		4.09165
	2.85796		13.55		9.9603		6.81658		8.72588		4.06835
	3.18878		12.8205		8.217		9.58785		7.71607		3.79363
	2.41779		11.8343		11.3249		10.2144		9.96012		4.88998
	3.92465		10.0202		10.4273		9.49663		9.70872		4.43459
Animal 2	5.27983		11.7923		8.75663		9.31977		11.2488		4.74158
	5.02513		10.8461		7.83091		10.0402		8.96045		3.465
	5.76037		10.8931		9.56939		11.1358		10.5484	Animal 2	5.42005
	3.8625		10.4603		8.88887		7.33672		11.1859		5.35332
	3.96354		7.97433		7.61611		10.6611		9.46082		5.11509
	6.3012		12.5159		9.45174		9.60619		8.88888		5.16262
	6.45995		10.0605		8.64308		11.4024		8.63553		5.17866
	5.41418		13.4045		8.86519		7.98728		10.5934		5.47046
	6.1124		11.8904		9.6342		12.2099		8.26447		4.00801
	4.82401		10.6383		7.80654		12.0337		7.86144		6.28141
	5.58976		10.4823		8.3962		11.7098		9.03351		2.13538
	3.58032		12.3917		9.38967		10.2355		8.90464		5.90319
	5.63058		10.5929		7.94291		10.5263		8.43881		5.54941
	5.53404		10.9289		8.91272		8.11668		8.44607		6.97339
	3.51989		10.6498		8.71074		8.87319		10.0906		4.97764
	4.2499		9.82311		8.32629		8.93665		8.34747		6.2151
	4.81		12.0194		7.45724		12.6582		9.55117		5.42591
	3.76932		10.3627		8.3611		9.30231		10.1935		7.98727
	5.50661		9.98985		7.02255		8.38218		11.976		5.38506
Animal 3	5.60224		11.8343		10.2458		9.93056		8.70334		5.20833
	6.41849		11.5077		8.71845		12.0772		9.52378	Animal 3	2.15796
	5.51877		11.7232		8.85722		10.2041		8.34012		2.88767
	5.84453		12.063		8.61345		11.2994		9.31995		2.34962
	6.26567		9.84236		8.88887		9.82309		8.46729		4.7824
	5.8548		10.2249		8.77946		11.6147		8.5616		4.02576
	4.1876		10.2457		8.36819		9.28478		9.92056		3.96197
	5.25486		9.67133		8.62071		8.82637		9.01724		5.82072
	6.42261		10.8461		7.08218		8.66534		8.09717		3.8432
	6.72495		8.81058		8.32655		8.68061		9.6154		4.67945
	3.61664		10.9406		7.34198		9.53303		8.8575		3.57398
	6.41437		11.1111		8.66563		9.39829		9.81332		4.26439
	4.95786		8.79513		9.25925		9.85222		8.32656		5.97377
	5.09684		8.51799		7.46269		10.3093		10.111		4.37062
	5.65611		11.7647	Animal 2	10.142		9.62481		10.2989		2.23014
	6.18812		10.8342		11.5206		8.77192	Animal 2	8.49623		2.15797
	4.48229		9.99999		10.4385		10.4819		9.12412		2.88766
	5.28262		11.8201		8.01917		9.38967		11.0252		2.34964
Animal 4	3.1506		8.93668		8.35428		7.6688		7.15314		4.78236
	5.8651		8.36109		9.30234		10.8108		10.4057		4.02579
	3.51989		10.7644		8.9927	Animal 2	11.8623		9.53303	Animal 4	5.34474
	3.85208		10.8108		9.09931		10.2041		9.44284		5.01756
	3.32005		10.4494		6.52737		9.04146		10.0704		5.84454
	4.34783		9.95994		7.93651		9.33727		8.75663		4.72367
	7.18391	Animal 2	10.8225		9.15756		11.9186		8.71074		6.15764
	5.26039		10		9.6805		10.8227		12.7713		4.3573
	6.11995		11.6279		8.49622		9.21658		8.79513		5.6338
	3.39098		14.0648		9.68048		10.6724		8.55444		4.37637
	5.19481		12.8867		7.94277		8.92856		9.88149		5.51572
	4.40529		12.2546		9.39865		11.4675		9.64292		5.23834
	4.41311		12.0194		7.62766		9.15758		9.51496		4.82859
	4.51666		11.1732		6.60066		12.165		11.5471		5.77367
	3.15061		10.3627		9.56939		10.0811		9.96031		6.0423
	5.86511		12.7389		9.99999		7.59284		9.7561		4.94804
	3.51987		13.7741		11.0866		8.07113		9.02521		4.78927
Animal 5	2.18723		11.9473		8.99288		9.34578		8.40336		4.37063
	5.04796		9.97021		10		10.1419		7.73998		5.56483
	2.42483		13.106		11.5206		7.66283		9.12394		4.65766
	6.15384		11.8907		9.69		10.9057		9.56044	Animal 5	4.13565
	4.16667		10.4166		10.0502		9.53231		9.02521		3.1143
	4.40723		11.2995		6.35315		9.29422		8.89692		4.06835
	2.33372		10.352		10.929		9.354		8.67296		4.75059
	5.0025		12.9532		9.64327		8.42492		8.45303		3.81679
	5.50055		12.1655		8.07751		8.51062		9.63384		3.02663
	3.42114		12.469		9.05809		11.5202		10.4931		3.5137
	3.43761		12.3761		8.68061		9.98049		10.0302		5.41125
	4.10172		10.3841		10.2564		9.9402		9.01725		3.24149
	4.12882		10.6952		10.5151		9.69918		7.83689		5.29101
	4.65116		11.8907		9.88151		13.106		8.70334		3.62845
	3.99202		9.23354		10.3093		12.4224		7.50183		2.68025
	2.97265		11.136		8.84163		13.3153		9.10741		4.80077
	4.03226		9.65255		8.54699		12.9535		8.11051		4.08497
	3.89105		10.5484		7.59306		14.948		10.02		3.45901
	3.64033		11.3765		12.24		13.245		9.69		3.72439
Animal 6	5.07099		10.7642		6.85868		11.4413		7.63359		5.77034
	4.71254		9.72773		9.16611		12.469		8.02558		2.67666
	4.54133		9.49662		9.00077		12.3457		8.31251		2.99581
	5.51877		10.7876		11.1237		11.7099		10.1627	Animal 6	3.25203
	3.75799		11.4677		9.65237		12.2394		8.57621		5.73066
	3.54233		13.0042		9.49661		14.0259		10.4061		3.32116
	5.31067		12.7712		10.3522		11.9048		9.94021		3.7037
	4.77555		10.582		10.0907		12.5786		9.50577		2.87026
	3.17058		11.4416		11.0866		14.3265		12.1505		5.4615
	4.0833		10.8108		8.15001		13.2622		8.89693		3.35345
	3.80518		11.9475		10.5263		12.6582		8.94448		4.9975
	3.9557		9.46061		8.90465		11.5607		10.3627		5.6338
	5.48847		13.6243		9.24222		8.93668		10.0907		4.86381
	6.36537		9.92057	Animal 3	12.0482		8.51064		9.8522		3.62056
	4.83793		11.6687		10.2353		8.77915		7.57017		4.26257
Animal 7	5.52181		12.1652		13.986		8.03214	Animal 3	10.3201		4.47027
	5.75043		11.0619		13.587		10.2885		7.96813	Animal 7	5.29942
	4.12712		12.4845		10.5263		10.2985		9.14057		5.38213
	3.70508		10.3736		10.4275		8.75631		7.48516		5.89275
	5.2356		8.53248		11.0988		10.0606		7.84916		4.78698
	3.3761		10.6268		10.627		9.45208		10.9173		5.45554
	4.48833		11.0497		10.3951		9.33692		12.3		5.06843
	4.11862		11.3768		8.79497		10.6383		10.1728		4.97512
	4.80769		10.672		10.977		12.9032		9.00078		4.82625
	3.27654		11.8766		10.6044		9.73677		8.98498		5.06842
	5.10986		10.2041		8.84954	Animal 3	10.7876		9.00902		4.97512
	5.09165		11.1358		10.7068		10.5484		10		4.82626
			11.1986		12.1506		11.4156		9.99998		5.23012
			13.4766		10.8696		11.3508		9.3718		4.00802
			12.7719		8.62069		10.3199		9.10773		5.92066
			9.35433		11.9331		11.0011		7.8125		4.64684
			11.6279		12.3457		10.6838		10.582		4.92126
			12.2852		10.4385		10.8344		9.46048		5.50964
			10.6836		10.1418		11.2738		9.14938		5.85138
			9.84274		8.56187		11.3897		9.02522		5.50661
			9.53268		11.9331		10.6156		9.60598		5.54324
		Animal 4	13.3156		9.82311		11.468		10.2355
			10.6836		13.6613		9.9404		8.07112
			11.7926		12.1801		10.6952		9.53269
			13.106		9.41627		10.5484		12.2102
			11.6145		10.2564		10.6725		9.3983
			12.5156		8.40336		8.21012		10.8696
			13.4228		8.17657		9.26781		11.4552
			8.76429		13.5135		9.93056		11.1358
			11.7232		13.8124		9.66183		8.96861
			11.7647		9.38969		9.97021		11.5341
			12.6746		9.91055		9.1827		10.6154
			13.0889		8.76442		9.7751		10.6048
			9.67115		9.45173		7.96813		11.6005
			14.9032		12.1362		9.59699		12.1511
			13.5317		12.2394		9.38968		12.3456
			9.23354		8.45332		8.90466		9.85222
			11.2868		10.8108		7.63358		10.5039
			14.4719		10.8346		10.7527		12.4848
			11.8343		12.0188		8.91272		10.9768
			11.8766		11.6152		10.6838		10.4824
			13.8121		11.0497		10.288		9.08251
			8.73361		10.3837		9.73717		11.4026
			12.8533		13.0041		8.62809		10.4931
			8.78729		10.2671		9.96013		13.1932
			11.601		10.6836		9.54207		11.7782
			11.236		8.64284		8.82609		12.5472
			12.24		11.7788		9.83292		11.9048
			11.2483		7.78208		10.6154		13.0893
			12.3006		7.26736		9.90099		13.2973
			10.3409		12.5787		8.65801		11.1859
			12.1069		14.3273		9.74681		10.6724
			7.73391		12.4538		8.83399		10.3414
			9.68998		12.0766		9.97		14.9918
			10.4819		10.5489		7.83689		13.6432
			12.3917		10.6836		9.50579		13.1748
			10.2989		11.4808		11.4942		13.4228
			11.0616	Animal 4	9.40727		9.9801		12.1656
			12.6426		8.80285		8.65801		12.27
			9.39829		10.0503		10.6952	Animal 4	8.82606
			10.2249		11.0866		9.13243		9.46081
			10.6613		11.2485		8.83398		9.08268
			10.5484		9.82312		8.76412		9.3371
			9.63384		10.2669		9.97003		9.14073
			10.3093		10.5934		10.3522		9.90099
			11.9192		9.44283		9.14907		8.68046
			11.2231		11.1358	Animal 4	9.3545		9.28512
			12.4381		8.72603		10.4933		11.8763
			10.989		9.82312		7.95538		12.407
			9.52382		12.3764		11.6959		11.8343
			9.1743		12.2248		9.76577		12.24
			11.0131		8.16991		10.3949		10.0805
			10.9052		9.86209		8.40335		15.0833
			11.0622		10.04		9.69		12.5944
			9.0661		10.2564		9.16594		14.0447
			6.87747		12.255		9.16579		12.255
			9.72792		9.63384		7.36924		12.0338
			9.69916		8.75663		11.0497		14.7274
			12.642		11.4286		7.91136		9.62478
			10.8581		8.23045		8.97663		12.4842
			6.64003		10.3305		10.953		11.1986
			8.41054		9.73719		9.51477		10.2985
		Animal 5	11.0497		11.5738		8.96863		9.87159
			11.7232		7.02255		10.6268		11.7372
			9.34579		8.77974		8.92857		9.37214
			13.3333		10.3732		11.6279		10.0502
			13.6243		9.38108		9.87197		7.20458
			12.3606		9.42493		9.57833		9.63381
			10.929		8.6207		10.4931		10.1523
			10.684		10.1728		10.0404		9.23357
			6.734		10.2671		9.89104		8.58367
			15.8221		7.8554		9.78481		8.76443
			16.026		10.5598		9.75611		8.74109
			13.8889		13.0035		9.25056		10.3845
			12.8205		9.8815		9.11582		8.47457
			12.24		10.0605		10.6725		10.5039
			12.6102		10.7758		9.22521		9.73717
			10.2671		11.7507		10.8931		12.6258
			10.672		10.4605		11.5874		10.1939
			13.6986		11.5341		9.68049		10.6724
			11.8207		11.1111		10.9173		12.2248
			11.933		11.0373		10.9768		10.0601
			9.98986		10.9528		11.6549		10.2147
			13.9085		12.6745		10.5371		10.6836
			13.8889		11.7232		10.6048		11.7929
			13.387		11.0497		9.90099		11.1232
			10.2667		11.6687		10.5039		11.2741
			13.7931		10.111		10.4605		11.8201
			6.08279		9.23387		10.0907		9.37214
			12.8038		11.2736		10.4061		14.0451
			14.2049		9.17431		10.6154		11.2865
			13.0379		12.9371		10.0708		9.09092
			12.0335		11.6959		11.3636		13.316
			12.5312		12.6903		9.24189		11.9615
			10.3845		10.6836		14.1444		11.4547
			11.9331	Animal 5	8.56904		10.1834		10.8461
			11.4943		7.05701		9.76577		10.1318
			6.90604		11.7929		11.8201		10.6498
			10.1834		9.8617		9.80392	Animal 5	9.74663
			11.9048		11.0497		13.986		9.24221
			11.1981		9.3458		10.582		8.1037
			11.4158		9.71834		9.96031		9.11566
			12.6739		12.4067	Animal 5	12.6261		9.31978
			10.4061		9.78482		12.5315		10.2879
			12.7389		8.59118		12.6261		6.99799
			11.5874		9.67094		13.9278		11.6279
			13.6424		11.0622		12.4686		8.41745
			10.2249		11.7782		11.2234		8.69566
			11.0131		9.16612		11.9476		10.7992
			10.5155		10.2142		13.2976		7.86157
			11.6142		12.9706		14.2857		11.0621
			12.8205		11.7647		11.4026		9.53284
			11.5607		11.3249		12.2248		8.23721
			9.68047		8.8889		10.5932		11.4416
			6.68459		11.1357		10.6838		11.2234
			11.4286		9.1074		11.0011		9.87157
			11.5341		11.2237		10.3307		10.7527
			9.17431		11.5341		10.5709		10.173
			8.50328		11.7647		10.582		10.5263
			12.0335		9.75611		9.90098		8.84956
			13.4053		8.90464		10.1112		9.737
			11.1854		8.67298		10.142		11.6823
			11.7512		8.20355		10.2879		9.80393
			8.72588		10.1314		8.39633		7.95549
			12.5632		9.27637		11.0131		12.4532
					9.96031		12.2251		8.93668
					9.07447		9.38091		13.6424
					9.71795		12.3151		11.5206
					8.30574		9.32842		8.74885
					9.40727		11.6144		9.89144
					9.74644		10.2249		10.6494
					10.5597		10.6271		8.45303
					10.2989		9.32824		12.9706
					13.6235		10.3201		9.88147
					13.55		12.1212		8.70304
					13.4957		12.3302		11.161
					12.1951		11.7788		12.0188
					10.1214		11.236		11.7788
					8.72618		12.2397		11.1981
					10.6952		12.1655		9.43397
					10.8576		12.0627		9.60636
					12.1212		11.1856		9.69916
					14.4715		11.4811		10.0503
					12.7554		13.7173		10.2041
					12.5947		8.13008		10.4383
					10.9048		11.0373		10.2147
					10.0301		9.18287		10.2355
					10.5263		11.3119		8.62069
					10.8461		9.15758		10.4712
					16.129		9.62479		9.38071
					13.4046		10.5263		8.06453
					13.0213		9.3196		12.5159
					11.1732		8.65041		9.72756
					10.449		7.9365		9.90098
				Animal 6	11.1237		10.9411	Animal 6	11.8766
					11.9048		10.2774		10.9772
					12.0335		10.6272		14.684
					11.3124		8.28479		11.7923
					10.6498		10.9411		10.1729
					14.8803		8.52508		11.6825
					11.351		8.50356		12.6902
					10.7989		9.59665		10.3093
					11.8206		12.7389		10.8227
					10.989	Animal 6	10.6158		10.9406
					12.5153		10.4492		11.8343
					11.4814		10.4385		10.0601
					11.4547		10.2879		12.8205
					12.0482		10.6724		11.2994
					11.0254		10.0603		12.723
					13.6236		11.7372		13.5867
					11.9906		11.8062		12.7066
					10.7876		10.4385		13.4588
					13.0207		11.8483		12.1951
					12.9365		12.3151		10.3414
					11.6549		9.26781		10.4819
					11.1484		12.092		11.8623
					12.9365		13.3511		11.0008
					11.1981		12.9032		8.56904
					11.0013		10.1318		10.1214
					8.71846		11.6684		11.9336
					10.3947		11.4026		10.111
					11.8485		13.5317		11.9475
					11.8201		12.4535		11.2994
					11.2995		9.32843		10.3842
					10.0605		12.5		11.6279
					11.8065		9.50577		11.7098
					10.582		12.3302		10.1834
					12.5153		10.6498		13.7546
					9.51496		12.18		10.582
					11.5071		13.298		10.7527
					11.2741		11.0378		9.76575
					12.0772		13.1748		10.1523
					11.8065		9.79456		11.2865
					11.7232		9.78442		10.6725
					11.7093		12.7872		10.7527
					10.7185		10.8108		12.5153
					10.2877		14.5562		9.42528
					8.74915		12.4073		12.1212
					11.0008		11.5874		11.8059
					10.7758		11.8343		12.1951
					9.70874		10.4167		10.3627
					10.4387		13.3333		9.99025
					10.6952		12.5		11.6687
					8.29876		11.2741		11.7367
					10.929		12.6902		10.4061
					7.73998		10.1834		9.90099
					9.72755		11.2994		9.25926
					8.75662		11.4153		13.9662
					9.50542		10.8461		10.3093
					9.06644		10.4167		10.8341
					7.50732		11.0741		9.65273
				Animal 7	12.6102		12.7066		10.4494
					10.8461		9.96031		11.0617
					9.69		14.7059		10.9411
					12.0624		11.1854		11.9186
					12.2853		9.29389	Animal 7	9.84237
					13.4228		13.55		11.3768
					12.1655		10.989		10.582
					10.5485		11.8766		9.9402
					10.741		12.1212		9.68998
					12.887		11.7366		8.68061
					12.6582		12.1511		9.85224
					14.1039		12.7547		9.34578
					10.7644		12.3917		10.7644
					11.5206		11.6279		11.976
					11.0497		12.3612		11.5077
					9.82311	Animal 7	11.8904		11.7093
					11.1732		11.6959		11.4552
					13.7745		12.6108		11.0861
					10.9528		10.04		11.0621
					10.5043		8.85751		9.98011
					11.5607		10.0804		9.48748
					12.4532		9.70872		10.6498
					10.8456		8.95261		13.1061
					13.7177		11.2488		10.6158
					10.7176		9.41628		11.0619
					11.4685		8.74884		10.4821
					10.2671		9.59703		10.5043
					11.2736		9.04144		9.7751
					11.0135		8.85754		10.5263
					12.1952		9.60598		12.1358
					10.4601		10.1935		12.4535
					9.33694		9.5787		10.6952
					9.77546		9.41627		10.8108
					14.4079		9.29355		10.1316
					9.28549		6.55319		12.2699
					8.08387		11.7506		10.4277
					12.3457		9.7848		11.4153
					11.9615		8.71075		10.4603
					13.9281		10.2457		10.3844
					12.7389		11.4418		9.55097
					9.09931		11.6142		9.56029
					11.0013		9.9704		10.8108
					9.7561		9.57834		12.2249
					9.71832		13.8311		11.2614
					9.13242		12.7389		9.17431
					9.92016		12.6905		9.43395
					9.25926		12.0047		10.3627
					8.13678		12.4224		11.3508
					8.4819		12.3154		11.3505
					7.71595		12.2099		10.3736
					11.1859		12.9198		10.7066
					9.47871		11.4943		11.1358
					9.9402		11.7235		11.2867
					9.35467		13.0039		9.79436
					10.9768		10.7295		11.1234
					10.8936		11.9047		10.101
					8.8416		12.8537		10.776
					8.67268		10.9647		10.7066
					8.61372		13.9278		12.0772
							12.755		13.3511
							12.18
							13.4411
							11.0373
							10.929
							13.3514
							13.3153
							13.1235
							11.5077
							11.1981
							11.7093
							12.4073
							11.7507
							13.6055
							13.55
							12.6264
							12.0047
							12.3457
							13.0379

## Sheet: Flat Ti
CTL		15cm/s		25cm/s		40cm/s		50cm/s		REC			Same data recapitulated for making the graph
														CTL	15cm/s	25cm/s	40cm/s	50cm/s	REC
Average Ti times for each animal (ms)
Animal 1	44.5	Animal 1	30.1517	Animal 1	35.448	Animal 1	31.075	Animal 1	30.1755	Animal 1	45.8947		Animal 1	44.5	30.1517	35.448	31.075	30.1755	45.8947
Animal 2	48.5579	Animal 2	28.0742	Animal 2	36.534	Animal 2	28.3288	Animal 2	37.4865	Animal 2	53.8056		Animal 2	48.5579	28.0742	36.534	28.3288	37.4865	53.8056
Animal 3	39.0111	Animal 3		Animal 3	20.3119	Animal 3	29.7071	Animal 3	28.4932	Animal 3	46.2211		Animal 3	39.0111		20.3119	29.7071	28.4932	46.2211
Animal 4	39.3	Animal 4	23.177	Animal 4	22.2293	Animal 4	24.6357	Animal 4	24.1237	Animal 4	63.8611		Animal 4	39.3	23.177	22.2293	24.6357	24.1237	63.8611
Animal 5	47.4158	Animal 5	25.6683	Animal 5	24.9695	Animal 5	27.2426	Animal 5	30.2911	Animal 5	45.6579		Animal 5	47.4158	25.6683	24.9695	27.2426	30.2911	45.6579
Animal 6	45.7133	Animal 6		Animal 6	28.3211	Animal 6	26.8746	Animal 6	28.0164	Animal 6	50.4462		Animal 6	45.7133		28.3211	26.8746	28.0164	50.4462
Animal 7	40.575	Animal 7		Animal 7	22.078	Animal 7	22.7286	Animal 7	22.8393	Animal 7	36.815		Animal 7	40.575		22.078	22.7286	22.8393	36.815
Mean	43.5819	Mean	26.7678	Mean	27.1274	Mean	27.2275	Mean	28.7751	Mean	48.9574		Mean	43.5819	26.7678	27.1274	27.2275	28.7751	48.9574
St Dev	3.9394	St Dev	3.0144	St Dev	6.57947		2.86494		4.79014		8.39676		St Dev	3.9394	3.0144	6.57947	2.86494	4.79014	8.39676
Individual Ti values for each animal
Animal 1	38.4	Animal 1	27.1	Animal 1	29.6	Animal 1	46.7	Animal 1	29.8	Animal 1	41.1
	39.5		31.8		28.4		44.5		27		35.4
	36.1		24.7		37.5		28.5		29.8		35.4
	39.5		24.7		35.2		38.8		33.6		45.6
	41.7		28.2		30.7		26.2		32.6		49
	42.9		29.4		31.8		35.3		35.4		41.5
	46		37.7		43.2		46.7		33.6		48.4
	40.4		32.9		36.4		25.1		28.9		60.3
	47.1		27.1		31.8		36.5		31.7		62.1
	60.6		31.8		31.8		36.5		27		54.2
	44.3		29.4		35.2		36.5		28.9		42.8
	44.9		36.5		33		42.2		36.2		35.1
	42.7		30.6		30.7		31.9		27		37.6
	37.5		25.9		28.3		41.3		32.6		48.5
	57.9		24.7		30.9		33.1		28.9		49.5
	50.2		28.2		34.1		33.1		28.9		45.3
	46.8		30.4		27.3		25.1		32.6		47
Animal 2	48.5		24.7		35.2		28.5		24.1		47
	45.2		28.2		40.9		16		29.9		46.2
	43		38.8		33		36.5		31	Animal 2	34.4
	49.3		22		37.5		28.3		27.6		38.9
	48.6		29.6		40.9		31.9		32.2		38.9
	53.5		28.6		35.2		36.5		36.8		65
	50		28.6		27.3		23.9		26.4		65
	45.1		21		33		30.8		34.5		49.3
	56.4		28.6		27.3		29.6		49.4		65
	40.3		29.6		43.7		25.1		31		56.6
	50.3		30.5		39.5		20.6				65
	44.3		28.4		38.5		36.3				60.2
	39.3		23.9		35.3		42.2		33.3		44.6
	58.7		30.5		40.5		35.3		25.3		59
	51		26.7		37.4		27.4		31		35.4
	53.6		23.9		34.5		28.4		29.9		44.6
	48.5		29.6		40.5		28.4		21.3		68.2
	54.9		25.8		40.5		37.3		27.2		68.2
	42.1		32.5		36.4		24		28.4		44.6
Animal 3	39.4		27.7		33.3		23.5		16.6		65.6
	37.2		29.6		33.3		28.4		28.4	Animal 3	63
	37.2		33.4		32.2		27.4		28.4		30.9
	46.1		32.5		35.5		29.4		30.8		56.8
	40.1		37.2		36.4		16.7		35.5		42
	40.1		31.1		35.9		30.4		28.4		65.4
	42.7		33.7		42.6		23.5		29.6		51.5
	42.7		32.4		40.5		29.6		26.1		52.7
	37.1		29.9		41.6		29.4		28.4		55.1
	35.9		31.1		36.4		25.5		25		49.1
	33.7		31.1		39.5		20.6		29.6		43.1
	44.9		23.4		35.3		27.4		39.1		33.6
	32.6		36.3		37.4		19.6		26.1		33.4
	27.7		44.1		39.5		37.3		32		37.4
	39.8		28.6	Animal 2	35.4		42.2		30.8		41.5
	37		32.4		34.1		27.4	Animal 2			32.8
	48.2		31.1		35.4		30.4		24.1		54.3
	39.8		31.1		43.2		30.4		30.1		35.7
Animal 4	32.3		33.7		40.6		32.3				58.5
	44.2		29.9		41.9		33.8		33.7		41.4
	44.2		36.3		41.9	Animal 2	17.9		32.5	Animal 4	56.7
	34.3		33.7		44.5		34.6		33.7		65.1
	35.3		28.6		56.1		33.4		30.1		48.2
	32.1		37.6		35.4		22.6		33.7		57.9
	36.6	Animal 2	32.5		38		26.2		26.5		56.7
	31.2		29		43.2		34.6		25.3		57.9
	35.7		25.6		38		21.4		32.5		53.1
	35.7		19.8		40.6		26.2		32.5		55.5
	41.9		26.7		38		32.2		30.1		54.3
	49.6		27.9		44.5		28.6		33.8		52.7
	41.9		30.2		45.2		29.8		28.9		50.3
	41.9		24.4		41.9		31		30.1		51.5
	41.9		24.4		41.9		35.7		25.3		50.3
	44.1		29.9		32.7		40.7		30.2		89.8
	45.2		29		35.4		35.7		35.6		74.2
Animal 5	55.8		36		38		36.9		35.6		87.4
	35		29		32.7		29.8		31.3		113.7
	62.4		30.2		24.9		38.1		34.5		74.2
	46		31.4		32.7		36.9		35.6	Animal 5	36.2
	53.6		31.4		28.8		44.1		36.7		37.9
	64.6		33.7		47.3		40.5		35.6		33.7
	36.6		31.4		35.2		34.6		29.1		46.3
	44.9		21.5		37.6		36.9		33.3		46.3
	41.2		25.6		43.7		36.9		26.3		44.6
	37.5		30.2		31.6		29.8		31.2		49.4
	44.9		27.9		34		27.4		25.2		54.3
	37.3		30.2		23.1		23.8		34.3		49.4
	49.2		24.8		37.6		29.8		33.3		50.7
	41.5		31.6		31.6		22.9		28		57.9
	49.2		26		37.6		20.1		33.3		45.4
	47.9		27.1		35.2		21.9		27.2		38.6
	47.9		30.5		35.2		23.6		36.2		49.3
	55.1		16.9		44.9		21.9		36.2		56
	50.3		27.1		29.1		21		313		47.1
Animal 6	43		39.6		40		21		32.5		37
	34.4		36.1		32.8		19.3		32.6		47.1
	36.4		33.9		29.4		24.5		35.4		40.3
	45.6		32.7		27.9		18.4		32.3	Animal 6	38.6
	58.2		28.2		32.8		15.8		32.5		45.1
	62.1		26		36.4		18.4		33.7		43.9
	65.1		30.5		32.8		23.6		32.5		43.1
	48.3		28.2		32.8		18		28.9		46
	40.4		28.2		34		16.6		37.4		54
	44.3		22.6		35.2		21.9		37.4		37.9
	43.4		25.8		31.6		21.9		33.7		48.4
	42.5		26		31.6		23.6		33.7		69.8
	35.6		23.7		30.3		34.7		33.4		43.7
	48.5		29.3	Animal 3	14.6		33.7		36.2		59.6
	37.9		27.1		19.7		35.7		32.5		62.4
Animal 7	41.1		24.8		17.9		33.7	Animal 3	38.3		63.3
	29.7		24.8		17.1		26		34	Animal 7	29.7
	35.4		27.1		16.5		35.7		38.3		29.7
	51.9		24.8		21		28.9		35.1		30.4
	36.9		26		14		38.5		33		41.2
	49.4		24.8		20.3		31.8		33		40.6
	44.3		22.6		31.7		29.9		33		35.8
	33.2		30.5		12.5		22.2		29.8		39.2
	40.9		27.1		23.5		27		31.9		37.2
	39.7		30.5		24.1		23.1		31.9		35.3
	40.9		28.2		23.8	Animal 3	27.1		30.8		38
	43.5		23		22.9		26.3		35.1		37.4
			27.1		15.2		23.9		34		40.1
			23.9		21		26.3		35.1		33.6
			31.8		24.1		23.1		32.1		32.5
			29.5		11.4		12.7		27.6		32.5
			30.7		19.1		27.1		37.2		39.8
			34.1		21		25.5		42.5		54
			29.5		23.4		19.1		30.6		28
			27.3		21.9		26.3		31.9		36.6
			25		21.2		24.7		34		44.7
		Animal 4	30.9		19		24.3		33
			21.1		19		27.1		37.2
			20.3		23.4		16.1		29.8
			24.4		27		23.1		33
			22.8		28.5		27.9		35.1
			17.9		27.7		36.6		23.4
			22.8		21.8		21.5		29.8
			24.4		16.1		21.5		29.8
			22		15.3		22.3		35.8
			25.2		21.2		36.5		26.9
			22		27.7		31.8		31.8
			22		28.5		34.1		28.9
			26.8		14.6		27.1		19.9
			23.6		9.5		35.3		22.9
			32.5		27		41.2		30.8
			24.4		19		36.5		29.8
			25.2		25.1		34.1		26.9
			26		21.7		31.8		25.9
			25.1		19.9		37.7		17.9
			30.1		18.2		35.3		24.9
			21.2		17.3		30.6		31.8
			21.2		17.3		25.9		23.1
			25.6		18.2		28.2		20.3
			25.6		14.7		27.1		22.2
			7.8		26.9		34.1		15.7
			17		29.5		31.8		24
			31.5		15.6		31.8		19.4
			17		28.6		32.9		24
			30.7		19.1		29.9		18.5
			23		16.5		22.9		20.3
			19.6		16.5		32.9		22.2
			24.7		20.8		34.9		28.6
			10.2		19.1		33.9		20.3
			20.5		17.3		35.9		24.9
			18.8		13		35.9		17.5
			20.3		19.9		26.9		21.2
			23.9	Animal 4	29.5		35.9		22.2
			27.3		28.1		32.9		22.2
			17		19.9		39.9	Animal 4	22.6
			25.6		17.7		33.9		25.8
			24.7		30.3		28.9		25
			34.1		25.9		32.9		25
			26.4		28.1		35.9		21
			26.4		16.3		32.9		26.6
			23.3		14		30.9		18.6
			24.1		17.7	Animal 4	28.2		29.1
			24.9		23.6		29.1		16.2
			21		13.3		24.7		20.2
			24.1		17		21.2		21.8
			23.3		17		30.8		25
			24.1		23.6		30.8		28.3
			15.9		16.3		29.1		19.4
			18.7		20.7		33.5		18.6
			16.3		16.1		29.1		24.2
			22.5		20.7		25.6		21.8
			23.3		25.8		24.2		25
			21		23.2		37		21.8
			24.9		22.3		27.3		25.4
			25.6		22.3		25.6		28.9
			25.6		15.1		30.8		31.6
			25.6		16		27.3		23.7
		Animal 5	26.8		29.4		25.6		25.4
			30.5		27.6		22		22.8
			24		24.1		22.5		22.8
			21.2		19.6		21.7		24.6
			23.1		25		21.7		16.7
			22.1		17.4		30.1		21.5
			24.9		33		22.5		23.7
			21.2		26.7		24.2		28.9
			23.1		25		22.5		26.3
			19.4		21.4		22.4		33.3
			23.8		16.9		25.1		24.6
			25.8		13.4		27.6		38.6
			20.3		19.4		29.2		22
			20.3		22.8		24.2		21.9
			24.9		22.8		26.7		20.2
			31.4		22.8		23.4		17.5
			27.7		22.8		19.2		17.5
			29.5		27.2		23.4		11.1
			26.8		25.4		17.5		25.4
			25.8		23.7		23.4		27.8
			24.9		21.1		19.2		23.8
			24		23.7		25.7		26.2
			24.8		24.6		21.9		29.4
			28.6		25.4		20.4		25.4
			28.7		21.1		17.4		17.9
			31.4		25		25.7		19.8
			21.2		22.8		33.3		22.2
			19.7		24.6		13.6		23
			16.6		24.6		25.7		28.6
			24.9		14		19.7		27.8
			24		24.6		14.4		27.8
			27.7		22.8		18.9		25.4
			21.2		28.1		19.8		23.8
			20	Animal 5	26.8		18.2		30.9
			21.9		31.3		18.2		22.2
			22.8		19.7		34		30.9
			28.5		24.2		28.7	Animal 5	29.7
			24.7		25.9		27.2		31.8
			21.9		23.3		21.9		31.8
			26.6		21.5		26.5		38.9
			30.4		18.8	Animal 5	12.3		31.8
			28.5		21.5		17.4		35.9
			29.5		30.9		19.6		36.9
			28		21.5		23.2		28.7
			30.4		22.4		26.8		36.9
			37.1		29.5		12.3		30.7
			29.5		23.3		23.9		27.7
			26.6		26.8		15.2		32.8
			28.5		25		10.9		41
			24.7		12.5		16		34.4
			27.7		27.7		21.8		32.8
			24.7		18.8		24.7		31.8
			24.7		19.9		27.2		26.6
			20.9		25.9		33		29.7
			28.5		18.8		35.4		31.8
			22.8		19.7		31.3		27.7
			33.3		28.6		28		36.9
			14.3		27.7		29.7		30.7
			29.5		33.1		28.8		29.7
			23.8		24.2		31.3		29.7
			32.3		25		29.7		32.8
			33.3		25		16.6		29.7
			31.4		30		23.9		30.7
					27.3		28.8		31.5
					35.4		28.8		20
					22.7		23.9		30.5
					27.3		25.5		30.5
					28.2		28.8		26.7
					26.4		30.5		14.3
					28.2		26.4		21
					30		24.7		31.5
					23.6		32.1		33.4
					27.3		23.9		26.7
					23.6		21.4		28.8
					26.4		19.8		19.1
					24.5		21.4		25.8
					29		33.8		24.8
					26		23.9		30.5
					27		23.1		30.5
					18		23.9		21.9
					21		23.9		31.5
					31		25.5		34.3
					27		38.3		31.5
					26		37.4		33.4
					31		35.4		26.7
					22		28.7		33.4
					18		35.4		35.3
					20		25.9		30
					19		37.4		29.6
					25		36.4		39.1
					27		33.5		29.6
					26		34.5		24.8
				Animal 6	25.6		29.7	Animal 6	30.3
					26.3		27.3		23.8
					27		33.5		24.6
					26.3		34.5		27.5
					26.1		34.5		34.7
					24.3		28.7		29.6
					20.8		39.3		28.9
					24.9		34.5		24.6
					27.5		27.8		29.6
					29.8	Animal 6	34.2		30.3
					22.9		31.1		28.9
					27		26.3		31.5
					27.7		23.2		22.7
					26.3		24.4		22.7
					26.8		23.8		22.1
					25.6		22.9		23.3
					23.6		27.5		21.4
					32.6		26.9		26.5
					22.2		23.2		22.1
					30.3		32.4		23.3
					25.6		32.4		25.8
					29.1		24.8		27.3
					31.8		25.4		27.9
					25.7		27.9		34.8
					24.3		26		30.4
					32.4		24.8		32.9
					34.5		28.6		29.2
					27.4		24.1		24.2
					24.3		24.1		23.2
					27		30.7		26.1
					29.7		30.7		31.6
					29.4		26.5		23
					28.8		27		19.9
					25.6		18.1		23.4
					30.7		23		25.4
					28.6		21.6		32.3
					29.4		29.3		27.3
					24.3		30.7		24.8
					26.2		30		35.4
					25.6		30.7		36.6
					28		24		35.4
					28		27.3		27.6
					33.3		28		33.3
					31.8		24		36.5
					31.3		24		25.6
					34		23.3		26.3
					34		26.7		32.1
					27.3		26		22.4
					28.7		22.7		27.6
					30.4		30.7		30.6
					31.9		35.5		25
					24.6		25.5		28.3
					38.4		26.1		34.5
					29.7		28.2		26.5
					38		35.5		29.6
					25.4		31.9		34.5
					35.5		27.5		28.3
				Animal 7	13.1		29.5		27.7
					20.1		24.1		31.2
					19		28.2		30.2
					15.7		28.8		25.9
					19.4		29.5	Animal 7	16.7
					15.7		28.2		21
					24		27		22.8
					20.1		30.2		22.2
					18.5		23.5		23.4
					17.6		23.5		23.4
					17.1		23.5		33.3
					17.1		28.8		32.5
					14.6		23.5		24.1
					15.3		23.5		27.4
					16.2		22.1		19.3
					18.5	Animal 7	23.9		24.9
					16.4		25.6		19.9
					18.5		24.7		9.9
					19.4		34.6		21.1
					16.6		26.4		21.8
					19		23.9		31.1
					20.8		30.5		28.6
					23.6		23.5		13.9
					27.5		25.6		23.9
					21.2		25.6		23.2
					21.2		21.4		21.3
					29.8		33		18.1
					23.6		26.4		23.2
					18.8		35.5		23.9
					20.1		33		26.5
					28.3		30.5		23.2
					23.6		21.7		12.6
					18.1		33		23.9
					21.7		24.7		21
					33		23.1		24
					17.3		27.2		22.8
					18.1		25.6		25.3
					22.8		35.5		21
					17.3		26.8		21.6
					22.8		25.6		31.3
					21.2		27.4		17.9
					25.1		30.5		31.4
					20.5		32.2		21.3
					31.4		17.9		17.3
					22.4		21		16.6
					30.8		17.9		31.8
					17.3		22.2		28.4
					25.6		21		22.2
					31.4		19.1		22.2
					23.3		16.7		22.2
					21.8		21		23.4
					22.4		22.2		21.6
					41		23.7		21
					25.6		13.6		24.4
					26.9		20.4		20.3
					20.2		21.6		20.8
					37.2		16		26
					26.9		19.7		20.3
					30.1		18.5		25.5
							17.3		20.3
							20.5
							23.6
							23.6
							16.1
							17.4
							19.2
							13
							21.3
							13
							18.6
							16.7
							11.8
							20.5
							18.6
							19.2
							14.9
							21.8
							14.9

## Sheet: Flat Te
CTL		15cm/s		25cm/s		40cm/s		50cm/s		RECOV			Same data recapitulated for making the graph
														CTL	15cm/s	25cm/s	40cm/s	50cm/s	REC
Average Te times for each animal (ms)
Animal 1	246.347	Animal 1	65.32	Animal 1	81.368	Animal 1	74.3929	Animal 1	77.5941	Animal 1	216.816		Animal 1	246.347	65.32	81.368	74.3929	77.5941	216.816
Animal 2	159.205	Animal 2	60.9848	Animal 2	72.5887	Animal 2	68.1729	Animal 2	74.4241	Animal 2	142.978		Animal 2	159.205	60.9848	72.5887	68.1729	74.4241	142.978
Animal 3	182.133	Animal 3		Animal 3	74.4068	Animal 3	72.5268	Animal 3	67.3475	Animal 3	224.758		Animal 3	182.133		74.4068	72.5268	67.3475	224.758
Animal 4	183.9	Animal 4	70.3787	Animal 4	74.9983	Animal 4	74.4661	Animal 4	69.9424	Animal 4	131.283		Animal 4	183.9	70.3787	74.9983	74.4661	69.9424	131.283
Animal 5	206.989	Animal 5	64.8032	Animal 5	70.4407	Animal 5	66.4115	Animal 5	71.2286	Animal 5	204.021		Animal 5	206.989	64.8032	70.4407	66.4115	71.2286	204.021
Animal 6	177.593	Animal 6		Animal 6	63.8474	Animal 6	60.3127	Animal 6	62.3902	Animal 6	192.385		Animal 6	177.593		63.8474	60.3127	62.3902	192.385
Animal 7	195.025	Animal 7		Animal 7	72.0322	Animal 7	68.0286	Animal 7	70.8107	Animal 7	159.955		Animal 7	195.025		72.0322	68.0286	70.8107	159.955
Mean	193.028	Mean	65.3717	Mean	72.8117	Mean	69.1873	Mean	70.5339	Mean	181.742		Mean	193.028	65.3717	72.8117	69.1873	70.5339	181.742
St Dev	27.767	St Dev	3.85747	St Dev	5.27848		5.08184		4.87106		36.999		St Dev	27.767	3.85747	5.27848	5.08184	4.87106	36.999
Individual Te values for each animal
Animal 1	344	Animal 1	77.7	Animal 1	89.8	Animal 1	79.8	Animal 1	77	Animal 1	128.9
	215		67.1		78.5		76.4		75		236.1
	147.8		58.8		91		60.4		71.8		192.8
	176		58.8		94.4		68.4		76.4		334.2
	422		67.1		76.9		80.9		78.3		100.4
	107.2		60		70.5		74.1		81.1		201.7
	250		62.4		101.2		72.9		87.6		122.2
	350.2		69.4		79.6		86.6		84.8		153
	170		121.2		86.4		90		85.7		316.5
	119		49.4		91		70.7		77.4		306
	150		54.1		70.5		62.7		86.7		219.4
	267.1		67.1		72.8		63.8		77.4		395.5
	299.7		48.2		70.5		116.3		85		225.9
	373.8		54.1		79.6		60.4		83.9		198.7
	237.5		62.4		72.8		65		84.8		219.1
	350		67.1		61.4		77.5		73.6		153.6
	208.6		55.3		85.3		74.1		84.8		213.3
Animal 2	147.8		67.1		81.9		72.9		81.6		160.4
	136.8		60		76.2		72.9		65.5		241.8
	124.6		45.9		70.5		87.8		62	Animal 2	153.9
	188		86.9		87.5		75.2		81.6		152.1
	187.3		64		80.7		70.7		74.7		135.1
	145.1		65.9		84.1		59.3		80.4		128.7
	89.4		52.5		76.2		99.2		68.9		133.6
	157		64		79.6		52.4		82.7		132.4
	159.8		63		79.6		53.6		85		205.8
	123.8		59.2		75.9		70.7		77		128.7
	240.5		60.1		72.8		70.6		74.7		374.2
	139.9		60.1		85.2		68.6		67.8		125.1
	119.8		72.5		75.9		64.7		89.6		101
	229.6		60.1		76.9		90.2		73.5		128.6
	187.5		76.4		83.2		74.5		82.7		143
	158.2		60.1		75.9		59.8		82		116.8
	178.6		64.9		98.7		78.4		74.6		98.4
	162		58.2		85.2		85.3		62.8		72.2
	149.2		65.9		76.9		71.6		84.1		110.2
Animal 3	145.7		59.2		68.6		59.8		87.6		133.8
	113.7		56.3		95.6		74.5		87.6	Animal 3	316
	146.4		53.5		82.1		59.8		84.1		383.9
	714.2		66.8		74.8		73.5		78.2		162.9
	131.5		92.6		71.7		68.6		75		177.7
	130		68.8		82.1		76.5		64		255.5
	146		71.4		80		85.3		87.6		130.5
	126.9		61		90.4		87.2		66		207.1
	123.5		79.2		94.6		89.2		78.2		179.6
	221.3		62.3		91.5		72.5		79.4		233.5
	140.4		63.6		81.1		88.2		71.1		142.5
	306.7		85.7		71.7		71.6		86.5		197.4
	134.8		77.9		98.7		80.4		72.2		130.6
	137		45.4		90.4		69.6		64		189.3
	123.2		59.7	Animal 2	58.9		64.7		53.3		120.4
	181.5		68.8		61.6		76.5	Animal 2	77.1		409.8
	117.6		61		82.5		75.5		77.1		314.1
	138		66.2		66.8		94.1		85.5		379.8
Animal 4	254.9		83.1		66.8		67.6		78.3		162.8
	159.7		79.2		72		72.5		74.7		177
	238.8		48		79.9	Animal 2	78.6		65	Animal 4	150.8
	238.5		66.2		106.1		76.3		74.7		115.8
	267.3		66.2		68.1		71.5		80.7		162.8
	124.8		70.1		77.3		63.1		77.1		103.7
	152.5	Animal 2	60.4		66.8		58.4		54.2		165.2
	135.5		61.6		61.6		72.7		85.5		132.7
	252.3		48.8		79.9		81		78.3		141.1
	133.8		59.3		83.8		67.9		72.3		131.5
	198.5		53.5		69.4		70.3		77.1		155.6
	148.9		56.2		68.1		69.1		73.5		162.8
	168.7		53.5		99.5		66.7		59		150.9
	139		61.6		81.2		65.5		68.6		128.1
	166.5		65.1		61.6		77.4		66.2		114.9
	231.6		46.5		58.9		91.7		82		92.2
	115		50		65.5		65.5		84.2		128.1
Animal 5	130.3		56.9		68.1		77.4		81		118.5
	347		61.6		57.6		78.6		78.8		97
	129.2		52.3		62.9		67.9		74.5		111.4
	192.6		50		81.2		67.9		77.7	Animal 5	196.1
	178.4		63.9		79.9		69.1		72.3		288.7
	260.5		66.2		66.7		69.1		86.4		205.4
	369		52.3		78.9		70.3		65.9		183.5
	148.3		56.9		85		78.6		69.6		196.1
	162.1		55.8		71.6		66.7		66.5		209.8
	250.9		51.1		61.9		69.1		70.6		162.8
	260.9		52.3		71.6		71.5		80.6		229.1
	180		47.6		81.3		70.3		80		152
	195.4		55.3		63.1		62		83.7		206.2
	197.5		72.2		69.2		61.3		77.6		123
	184.2		66.6		74		50.8		81.7		190.3
	200.1		65.5		64.3		52.5		68.5		203.8
	231.3		81.3		94.7		49		69.9		220.3
	185.7		66.6		58.3		54.3		83.1		162.3
	129.4		58.7		88.6		56.9		86.8		125.2
Animal 6	167.3		58.7		83.7		62.2		92.8		343.7
	158.7		72.2		86.2		65.7		74.7		292.4
	172.6		57.6		60.7		59.5		78.3		185.7
	136.9		56.4		72.8		63		65.1	Animal 6	246.9
	226.8		60.9		61.9		59.5		74.7		143.1
	214		54.2		69.2		62.2		61.5		229.7
	134.1		63.2		65.5		59.5		67.5		248.8
	174.6		58.7		55.8		51.7		66.3		270
	254.4		57.6		93.4		49.9		72.3		132.1
	208.3		68.8		58.3		60.4		71.1		250.3
	203.1		70		88.6		67.4		62.7		142.4
	210		51.9		54.6		53.4		63.9		139.6
	150		65.5		81.3		92.5		75.9		208.5
	100.8		70	Animal 3	81.3		83.8		77.1		184.3
	152.3		54.2		55.2		73.2		68.7		153.6
Animal 7	142.9		62.1		54.6		79	Animal 3	79.8		151.7
	144.2		58.7		76.8		75.2		77.7	Animal 7	220.4
	207.4		57.6		76.2		79		92.5		153.5
	227.4		97.1		71.1		67.5		77.7		138.6
	274.4		77.9		79.4		70.4		69.1		165.6
	172.6		64.3		74.3		74.2		59.6		129.1
	195.5		64.3		85.1		61.7		64.9		159.5
	220.6		57.6		77.5		58.8		72.3		158.2
	179.5		62.1		72.4		64.6		83		173.1
	245.1		67.7		89.9		108.9		76.6		160
	160		56.4		67.3	Animal 3	68.5		68.1		161.1
	170.7		71.1		57.2		64.5		56.4		171.9
			49.8		80		58.9		81.9		132.3
			52.3		91.4		65.3		79.8		201.5
			61.3		59.7		76.5		74.5		153.5
			67		72.4		69.3		77.7		181.7
			48.8		74.9		75.7		70.2		180.1
			65.9		89.5		64.5		60.6		135.4
			70.4		98.5		68.5		72.3		137.9
			77.2		64.2		66.1		80.8		139.1
			65.9		78.8		65.3		69.1		146.6
		Animal 4	82.9		52.6		69.3		80.8
			72.4		65		70.9		65.9
			59.5		75.2		78.8		64.9
			56.1		70.1		72.5		69.1
			63.5		96.4		94.8		64.9
			60.2		97.1		66.9		79.8
			49.6		47.4		83.6		58.7
			91.9		57.7		77.2		67.7
			61		87.6		58.1		63.7
			63.5		83.9		78.9		68.7
			59.4		85.4		69.4		63.7
			52.9		75.9		78.9		58.7
			75.7		72.3		80		58.7
			35.8		70.1		75.3		61.7
			44.7		92		74.1		61.7
			74		66.4		81.2		70.6
			65.9		72.8		74.1		54.7
			54.5		53.7		77.7		61.7
			55.3		64.2		58.8		79.6
			54.5		75.4		62.4		75.6
			54.5		81.5		74.1		75.6
			82.2		59		78.9		64.7
			75.9		78		76.5		64.7
			74.2		77.2		85.9		63.7
			74.2		77.2		76.5		61
			71.6		68.5		71.8		57.3
			55.4		112		73		61.9
			60.5		105.8		68.8		51.7
			66.5		65		74.2		65.6
			65.6		55.5		75.8		72
			110		61.6		76.8		67.4
			75.9		60.7		73.8		50.8
			86.9		75.4		78.8		50.8
			59.7		76.3		68.8		52.6
			75		76.3		73.8		59.1
			70.7		71.1		71.8		56.3
			55.4	Animal 4	83.5		73.8		62.8
			81.8		72.4		70.8		60
			77.6		69.4		68.8	Animal 4	63
			68.2		73.1		73.8		80.8
			71.6		67.2		79.8		87.2
			69.9		75.3		69.8		85.6
			71.5		65.7		63.8		79.9
			64.5		88.6		67.8		87.2
			59.8		77.6		67.8		89.6
			55.2		95.3	Animal 4	66.1		79.1
			65.3		77.6		81.1		71.1
			84.7		63.5		77.6		60.6
			88.6		64.3		80.2		61.4
			69.9		107.1		64.3		58.1
			64.5		83.5		80.2		58.9
			75.4		83.5		82		58.9
			89.4		73.1		75.8		61.4
			128.2		63.5		83.7		46.8
			80		70.9		91.7		58.1
			79.3		90.9		78.4		57.3
			55.2		63.3		73.2		50.9
			69.9		100.7		96.1		62.3
			128.2		74		74.9		58.8
			77.7		90.9		72.3		71
			69.2		67.7		82.9		67.5
		Animal 5	55.4		113.2		74		67.5
			80.3		86.4		61.7		85.1
			49.8		74		71		80.7
			53.5		82.9		85.2		78
			59.1		82.9		76.8		85.1
			66.4		80.2		65.1		84.2
			60		82.9		78.5		88.6
			132		75.7		79.3		85.1
			39.7		97.1		79.3		85.1
			46.1		67.7		78.5		77.2
			46.1		59.7		81		75.4
			55.4		97.1		68.5		78.9
			60		83.4		81.8		77.2
			58.1		71.1		76		78.1
			75.7		63.2		70.1		42.1
			58.1		69.3		64.3		80.9
			48		64.1		86		74.6
			58.1		61.4		65.1		76.2
			52.6		69.3		75.2		66.6
			72.9		67.6		63.5		71.4
			49.8		56.2		66		70.6
			48.9		57		74.1		54.7
			50.8		68.4		70.3		65.1
			53.5		63.2		84.7		63.5
			59.1		75.5		71.8		63.5
			132		76.3		76.4		76.2
			50.8		73.7		62		60.3
			53.5		86		84		61.1
			61.8		51.8		71.1		69.8
			58.1		66.7		72.6		61.1
			55.4		53.5		79.4		54
			70.1		72.8		80.9		65.1
			101.5		57		60.5		69
			69.4	Animal 5	100.2		74.1		68.2
			128.3		74.2		77.9		72.2
			66.5		79.6		59.7		58.7
			58		66.2		56.7	Animal 5	72.7
			67.5		85		57.5		74.8
			62.7		77.8		75.6		72.7
			49.4		60.8		73.4		69.7
			54.2		83.2	Animal 5	63.1		91.2
			53.2		89.4		57.3		76.8
			52.3		75.1		60.9		75.8
			62.7		69.8		55.8		69.7
			58.9		59		62.4		84
			62.7		81.4		70.3		79.9
			64.6		64.4		52.9		76.8
			57		58.1		57.3		72.7
			50.4		61.7		75.4		69.7
			60.8		80.5		62.4		67.9
			75.1		82.3		65.3		67.6
			124.5		69.8		61.8		63.5
			58		88.6		70.9		69.7
			73.2		62.6		61		66.6
			79.8		69.8		62.6		63.5
			78.9		63.5		65.1		69.7
			64.6		73.3		73.3		73.8
			59.9		88.6		66.8		74.8
			58.9		74.2		71.7		56.3
			62.7		96.6		68.4		69.7
			81.7		79.6		75		78.9
			52.3		79.6		70		68.6
			61.8		82.7		80.8		65.6
					72.7		54.4		60.1
					75.4		75.8		63.9
					76.3		61.8		83
					92.7		70.9		77.3
					81.8		67.6		67.7
					74.5		75.7		99.2
					66.3		68.4		56.3
					57.2		60.2		74.4
					63.6		51.9		67.7
					41.8		59.3		62
					50		68.1		66.8
					55.4		61.8		66.8
					76.3		53.6		63
					70.9		58.5		76.3
					60.9		64.3		75.4
					56.9		62.6		71.5
					52.9		45.3		77.3
					47.9		54.4		69.6
					58.9		68.4		61
					68.9		60.4		63.9
					66.9		69		66.8
					68.9		74.7		77.3
					69.9		77.6		72.5
					45.9		68		70.6
					48.9		72.8		78.2
					59.9		69		62
					61.9		80.5		71.5
					71.9		74.7		71.5
					82.9		64.2		72.5
				Animal 6	59.6		59.4	Animal 6	55.6
					57.5		81.4		54.9
					55.4		72.8		51.3
					63.7		70.9		57.1
					58.9		85.3		62.9
					54		63.2		54.2
					70.7		75.7		55.6
					60.3		57.5		69.4
					59.6		80.5		63.6
					59.6	Animal 6	60.5		60.7
					59.6		61.1		60.7
					56.8		73.3		58
					60.3		67.8		66.8
					56.8		69		58.6
					57.5		70.8		59.3
					53.4		63.5		56.1
					59.6		69.6		51.7
					63.1		51.9		51.7
					50.6		63.5		60.5
					47.1		66.1		71.2
					54		59.7		69.4
					58.1		52.1		67.6
					59.5		55.3		65.2
					54.2		58.4		65.2
					65.6		57.8		68.3
					70.3		62.2		65.8
					73.7		59.1		57.1
					54.7		56.5		73.2
					59.5		61.6		68.3
					64.2		64.2		63.3
					54.7		62.1		60.8
					60.2		65.1		60.8
					69.1		64.9		65.8
					58.9		67.6		59
					63.4		51.6		66.4
					64		57.9		63.3
					58.9		60		65.2
					60.2		68.3		75.1
					57		73.2		62.1
					61.4		56.5		55.9
					57.3		60		60.2
					66		51.4		62.8
					79.3		56.7		61.6
					68		56.7		62.2
					63.3		57.4		59
					66.7		59.4		55.1
					64.7		56.7		64.8
					70.7		64		76.3
					70		56.7		61.6
					80.4		53.4		72.4
					71		62.4		68.6
					95.6		61.7		67.8
					77.5		61		48.7
					83.3		63.7		70.2
					73.2		63.7		60.4
					85.5		57		61.6
					81.1		55.6		75.8
				Animal 7	76.3		57.7		62.2
					88.7		56.3		59.8
					63.3		61.7		54.2
					60.6		67		62.8
					61		55	Animal 7	87.6
					65.6		60.3		67.9
					73		59		70.3
					67		53.6		76.5
					64.3		61		82.7
					61		55.6		82.7
					50.4		55		77.8
					76.3		55		72.8
					74.4		62.5		67.9
					72.1		55		59.7
					86		56.3		65.9
					69.8	Animal 7	58.6		62.8
					58.2		57.7		68.4
					74		75.9		75.2
					78.6		76.7		71.5
					62.9		75.1		75.2
					63.3		74.2		78.4
					61		75.9		63.4
					53.4		64.3		64.7
					62		90.7		71
					66.7		86.6		66.5
					74.6		83.3		74.2
					63.6		75.1		74.2
					62.8		79.2		70.4
					63.6		73.4		74.2
					71.5		68.5		56.1
					82.4		80		56.1
					78.5		78.4		81.3
					55.7		77.5		68.4
					85.6		125.4		84.5
					88.7		66		52.4
					57.3		70.1		75.2
					62.8		80		64.1
					55		70.1		75.2
					63.6		61.9		75.2
					90.3		62.7		76.5
					66.7		70.1		83.9
					65.2		76.7		64.7
					83.3		76.7		61
					75		54.9		70.3
					73.7		58		81.4
					80.7		56.7		83.9
					90.4		63.5		70.9
					92.3		60.4		61.7
					91		60.4		65.4
					100.6		64.8		66
					75.6		57.2		73.4
					74.3		64.8		74
					66		64.1		66.6
					78.2		63.5		79.5
					69.2		66		70.6
					67.9		67.8		77.4
					79.5		62.9		66.5
					84		69.7		68.6
					90.4		54.9		61.8
							59.2		50.9
							55.2
							67.6
							70.1
							58.9
							57
							60.1
							73.8
							67.6
							67
							67.6
							56.4
							57.7
							63.2
							58.5
							65.7
							60.8
							56.4
							62.6

## Sheet: Flat Normalized Amplitude
CTL		15cm/s			25cm/s			40cm/s			50cm/s			RECOV				Same data recapitulated for making the graph
Average values for each animal
	Amplitude		% CTRL Ampl	Amplitude		% CTRL Ampl	Amplitude		% CTRL Ampl	Amplitude		% CTRL Ampl	Amplitude		% CTRL Ampl	Amplitude			CTL	15cm/s	25cm/s	40cm/s	50cm/s	REC
Animal 1	0.289116	Animal 1	166.111	0.480253	Animal 1	138.048	0.399118	Animal 1	149.579	0.432458	Animal 1	157.377	0.455002	Animal 1	114.374	0.330675		Animal 1	100	166.111	138.048	149.579	157.377	114.374
Animal 2	0.371954	Animal 2	142.49	0.529996	Animal 2	125.566	0.467049	Animal 2	135.979	0.505779	Animal 2	122.167	0.454406	Animal 2	129.677	0.482339		Animal 2	100	142.49	125.566	135.979	122.167	129.677
Animal 3	0.418257	Animal 3			Animal 3	118.561	0.495888	Animal 3	127.325	0.532544	Animal 3	125.438	0.524653	Animal 3	114.727	0.479853		Animal 3	100		118.561	127.325	125.438	114.727
Animal 4	0.114474	Animal 4	145.808	0.166912	Animal 4	137.591	0.157506	Animal 4	131.979	0.151082	Animal 4	131.979	0.137571	Animal 4	131.842	0.150925		Animal 4	100	145.808	137.591	131.979	131.979	131.842
Animal 5	0.371956	Animal 5	147.045	0.54694	Animal 5	138.509	0.515193	Animal 5	139.943	0.520525	Animal 5	133.916	0.498109	Animal 5	86.808	0.322887		Animal 5	100	147.045	138.509	139.943	133.916	86.808
Animal 6	0.440427	Animal 6			Animal 6	119.982	0.528434	Animal 6	145.371	0.640255	Animal 6	134.498	0.592365	Animal 6	79.5534	0.350375		Animal 6	100		119.982	145.371	134.498	79.5534
Animal 7	0.435456	Animal 7			Animal 7	130.329	0.567526	Animal 7	140.89	0.613512	Animal 7	146.616	0.638451	Animal 7	95.2122	0.414608		Animal 7	100		130.329	140.89	146.616	95.2122
Mean		Mean	150.363		Mean	129.798		Mean	138.724		Mean	135.999		Mean	107.456			Mean	100	150.363	129.798	138.724	135.999	107.456
St Dev		St Dev	10.673		St Dev	8.61675			7.65031			12.2156			20.5913			St Dev	0	10.673	8.61675	7.65031	12.2156	20.5913
Individual values for each animal
Animal 1	0.299353	Animal 1		0.4758	Animal 1		0.404384	Animal 1		0.329949	Animal 1		0.374164	Animal 1		0.385765
	0.358325			0.573017			0.481115			0.391232			0.437077			0.414256
	0.42586			0.620373			0.393098			0.330951			0.489599			0.321388
	0.35547			0.389435			0.375465			0.457978			0.399949			0.399088
	0.297496			0.414851			0.359496			0.40018			0.483876			0.304094
	0.303588			0.362953			0.518578			0.56893			0.371232			0.377065
	0.284919			0.39777			0.330288			0.355753			0.432293			0.402357
	0.32163			0.430844			0.43661			0.400714			0.369766			0.286459
	0.237518			0.400615			0.482075			0.442592			0.475877			0.314381
	0.184417			0.517045			0.422049			0.332745			0.446992			0.269113
	0.280333			0.496522			0.488774			0.367783			0.389635			0.228146
	0.269084			0.418797			0.407702			0.41805			0.391217			0.281927
	0.210451			0.502223			0.41919			0.508271			0.399641			0.292198
	0.301938			0.499097			0.499292			0.519964			0.534404			0.283178
	0.243677			0.527288			0.443576			0.433319			0.449886			0.363822
	0.285707			0.501439			0.399968			0.411664			0.367554			0.363525
	0.255214			0.595226			0.412609			0.425802			0.409865			0.301879
Animal 2	0.332343			0.50522			0.441325			0.477565			0.435135			0.363072
	0.443924			0.513837			0.327589			0.429027			0.394548			0.331106
	0.417849			0.493443			0.360989			0.649501			0.532732	Animal 2		0.522657
	0.331417			0.450945			0.324965			0.420873			0.570143			0.414899
	0.323904			0.339046			0.31145			0.434321			0.538584			0.633621
	0.32327			0.354219			0.39233			0.376289			0.492801			0.450317
	0.360904			0.547964			0.410518			0.4653			0.574232			0.517455
	0.332401			0.412557			0.379518			0.388332			0.556408			0.29908
	0.415073			0.432483			0.498748			0.373271			0.400747			0.472477
	0.353553			0.595671			0.296206			0.402235			0.589536			0.435317
	0.284444			0.324447			0.368744			0.418792			0.356842			0.35749
	0.268587			0.612705			0.499804			0.390738			0.419844			0.420463
	0.361993			0.481126			0.341414			0.394029			0.400927			0.458868
	0.441285			0.514656			0.371731			0.445258			0.397892			0.455162
	0.50999			0.471784			0.351943			0.360162			0.430608			0.620666
	0.4066			0.577548			0.494097			0.501235			0.42432			0.637501
	0.399615			0.637045			0.396021			0.469813			0.42949			0.377767
	0.341376			0.505384			0.416257			0.406085			0.601689			0.639707
	0.418597			0.451905			0.332688			0.477188			0.446542			0.545938
Animal 3	0.405544			0.446602			0.475247			0.378669			0.536667			0.422715
	0.426412			0.536432			0.489478			0.48304			0.562118	Animal 3		0.472321
	0.431111			0.656362			0.407264			0.493627			0.516863			0.631555
	0.49403			0.567702			0.312303			0.504799			0.50678			0.412092
	0.340291			0.57516			0.346108			0.478358			0.554389			0.534298
	0.391543			0.495913			0.339804			0.474235			0.374486			0.480219
	0.422284			0.526504			0.379796			0.514735			0.487297			0.580302
	0.617203			0.475964			0.296953			0.4428			0.49599			0.473212
	0.521556			0.386204			0.322416			0.374468			0.40103			0.330933
	0.383601			0.462769			0.371123			0.352124			0.357562			0.314135
	0.351049			0.443089			0.290243			0.426257			0.299523			0.658006
	0.306625			0.392713			0.497681			0.551646			0.488403			0.376266
	0.394338			0.548994			0.416481			0.437104			0.515654			0.359339
	0.464355			0.413329			0.420417			0.369201			0.40746			0.357888
	0.537101			0.654664	Animal 2		0.482851			0.277692			0.484815			0.606161
	0.436472			0.339667			0.495353			0.384664	Animal 2		0.35872			0.472321
	0.297951			0.49089			0.37944			0.42229			0.486773			0.631555
	0.307152			0.420213			0.497101			0.571675			0.458179			0.412092
Animal 4	0.0799231			0.360389			0.480716			0.463571			0.315498			0.534298
	0.104652			0.442094			0.601773			0.440784			0.5507			0.480219
	0.120666			0.358586			0.425341	Animal 2		0.499633			0.350721	Animal 4		0.131725
	0.094833			0.499039			0.473744			0.377576			0.442579			0.11929
	0.116999			0.521692			0.479802			0.369922			0.610053			0.178302
	0.144611			0.454937			0.400114			0.398414			0.540602			0.163532
	0.149132	Animal 2		0.505			0.530013			0.487753			0.40276			0.134514
	0.104077			0.639868			0.324776			0.528536			0.568201			0.113739
	0.123561			0.63646			0.417373			0.517549			0.515654			0.106168
	0.09021			0.501577			0.440608			0.456484			0.531365			0.115631
	0.124913			0.448936			0.415828			0.463173			0.432591			0.138187
	0.082668			0.693502			0.47415			0.621449			0.483878			0.177507
	0.132957			0.496672			0.431806			0.407565			0.462378
	0.146284			0.599467			0.385193			0.449941			0.479923
	0.0883659			0.563956			0.405846			0.405078			0.423686
	0.113095			0.430037			0.509156			0.36898			0.398672			0.187775
	0.129109			0.656883			0.337502			0.525276			0.548955
Animal 5	0.377321			0.800194			0.53353			0.395878			0.398119			0.202629
	0.39062			0.632245			0.464433			0.423308			0.545463
	0.35455			0.7333			0.466303			0.424057			0.6057			0.193027
	0.384868			0.48495			0.49454			0.653442			0.447131	Animal 5		0.296976
	0.360014			0.617115			0.432477			0.42256			0.4761			0.250555
	0.449044			0.398912			0.364478			0.447502			0.334899			0.316798
	0.30484			0.677091			0.350655			0.491786			0.502639			0.282673
	0.422003			0.582351			0.471873			0.417827			0.401566			0.271154
	0.314626			0.619373			0.471569			0.528512			0.456191			0.337579
	0.327141			0.628506			0.524382			0.517115			0.531078			0.260227
	0.413491			0.583128			0.557274			0.613964			0.464411			0.259362
	0.329962			0.546164			0.498361			0.6412			0.379337			0.347738
	0.330402			0.552118			0.435648			0.421811			0.46145			0.322096
	0.401918			0.692323			0.463681			0.469499			0.35682			0.300973
	0.342177			0.45069			0.514848			0.659237			0.371647			0.28722
	0.371706			0.576008			0.484355			0.626471			0.438623			0.463483
	0.498663			0.667527			0.439693			0.518829			0.346633			0.293036
	0.388575			0.535679			0.45555			0.5352			0.381303			0.358975
	0.305235			0.54661			0.759746			0.674087			0.57556			0.361485
Animal 6	0.572827			0.370376			0.436929			0.515352			0.261028			0.383784
	0.488125			0.428411			0.446788			0.488164			0.302085			0.381855
	0.360716			0.448936			0.663429			0.524817			0.436237			0.358887
	0.498766			0.381811			0.461506			0.614688			0.534326	Animal 6		0.41058
	0.586614			0.504986			0.387652			0.525373			0.489381			0.385508
	0.456133			0.565293			0.376675			0.69379			0.397014			0.411179
	0.383266			0.633684			0.53847			0.654891			0.496363			0.340034
	0.480599			0.643723			0.526415			0.487126			0.510019			0.224934
	0.343733			0.492803			0.463031			0.703617			0.424216			0.47487
	0.430536			0.374921			0.480838			0.596168			0.537796			0.309856
	0.353314			0.591369			0.40542			0.438761			0.403268			0.387703
	0.404675			0.541173			0.567011			0.43654			0.517245			0.329412
	0.451815			0.517398			0.427537			0.519891			0.522725			0.392163
	0.479455			0.453596	Animal 3		0.42225			0.404523			0.387712			0.335803
	0.315832			0.333959			0.450451			0.491013			0.481934			0.295709
Animal 7	0.414732			0.542755			0.412192			0.373061	Animal 3		0.348749			0.257123
	0.418734			0.540037			0.465943			0.472952			0.498977	Animal 7		0.662936
	0.345815			0.552075			0.627348			0.486353			0.391257			0.403309
	0.509915			0.476695			0.516348			0.660951			0.485612			0.350575
	0.559982			0.352297			0.523323			0.430552			0.557935			0.232767
	0.551377			0.46585			0.51193			0.528246			0.605247			0.390473
	0.649918			0.434121			0.338154			0.523055			0.611553			0.362372
	0.411853			0.513385			0.481397			0.441973			0.398476			0.275454
	0.36873			0.384054			0.439848			0.556158			0.797848			0.279457
	0.343394			0.389017			0.543214			0.513348			0.528443			0.362372
	0.304034			0.473516			0.494238	Animal 3		0.483021			0.472033			0.275454
	0.346993			0.425851			0.463311			0.447622			0.354573			0.279457
				0.576426			0.567035			0.525713			0.538667			0.454531
				0.753206			0.399238			0.576908			0.618799			0.418506
				0.544726			0.471414			0.598914			0.410955			0.408999
				0.47389			0.458216			0.421266			0.491704			0.308047
				0.634374			0.59612			0.425702			0.517815			0.491498
				0.461276			0.472241			0.465148			0.456522			0.609776
				0.405212			0.431293			0.525194			0.428479			0.556955
				0.306257			0.432384			0.527422			0.514273			0.506233
				0.495651			0.433079			0.442796			0.421421			0.662981
		Animal 4		0.197581			0.337233			0.455866			0.498359
				0.162484			0.535111			0.497843			0.482902
				0.218306			0.52744			0.633124			0.373814
				0.192942			0.652428			0.480663			0.607581
				0.168945			0.412793			0.735666			0.472543
				0.191804			0.592623			0.412546			0.480809
				0.236574			0.59157			0.563125			0.640885
				0.14243			0.664573			0.646778			0.828146
				0.194573			0.447312			0.492888			0.510838
				0.160387			0.486323			0.679797			0.549213
				0.239415			0.426875			0.488041			0.46892
				0.198912			0.521311			0.548087			0.387957
				0.129784			0.494389			0.486051			0.523424
				0.195915			0.522139			0.62977			0.529918
				0.132625			0.468857			0.354362			0.489074
				0.182514			0.578898			0.426524			0.550528
				0.14321			0.506872			0.55196			0.422816
				0.126872			0.514261			0.577644			0.51371
				0.185523			0.44592			0.442926			0.516366
				0.187081			0.447161			0.477633			0.743881
				0.130468			0.633007			0.470623			0.381811
				0.175562			0.622365			0.43003			0.589789
				0.175526			0.456806			0.385391			0.468894
				0.123276			0.518773			0.451776			0.536279
				0.1735			0.395591			0.53294			0.560485
				0.124223			0.273743			0.479321			0.565718
				0.148064			0.60097			0.498211			0.485747
				0.155172			0.385645			0.537203			0.59682
				0.11407			0.447838			0.51933			0.518701
				0.137468			0.39136			0.502366			0.55713
				0.215166			0.699204			0.711648			0.597169
				0.162424			0.545828			0.601619			0.452497
				0.273865			0.47995			0.569249			0.693832
				0.128909			0.58373			0.537917			0.458052
				0.172721			0.548967			0.557369			0.677999
				0.141831			0.548535			0.661232			0.705774
				0.167255	Animal 4		0.120093			0.510134			0.436315
				0.202808			0.164247			0.720823			0.630499
				0.135226			0.157766			0.638945	Animal 4		0.162514
				0.159931			0.135419			0.58974			0.0949732
				0.164402			0.163896			0.53677			0.103934
				0.120782			0.101728			0.728548			0.121506
				0.154815			0.112463			0.515824			0.174849
				0.183743			0.173312			0.601749			0.130605
				0.152086			0.127204			0.512709			0.149679
				0.189041			0.164929	Animal 4		0.209363			0.0922771
				0.168268			0.148726			0.140983			0.187868
				0.202514			0.15772			0.196453			0.157195
				0.16973			0.127847			0.177365			0.11213
				0.191906			0.164643			0.159982			0.146684
				0.115754			0.153038			0.183086			0.157747
				0.147363			0.161318			0.0839788			0.148023
				0.137522			0.157532			0.155432			0.172114
				0.210269			0.161104			0.117821			0.187535
				0.128268			0.152596			0.207977			0.203696
				0.132763			0.180891			0.132764			0.144606
				0.215915			0.140985			0.114013			0.151034
				0.11211			0.142543			0.150197			0.14288
				0.152601			0.110846			0.120359			0.046895
				0.154711			0.163604			0.179062			0.107501
				0.17172			0.163773			0.145219			0.0745057
		Animal 5		0.611694			0.13151			0.149671			0.0983042
				0.698038			0.122827			0.183772			0.0736534
				0.546347			0.163604			0.142303			0.117933
				0.577207			0.175903			0.172636			0.153201
				0.492551			0.128977			0.115659			0.14967
				0.560289			0.166896			0.157148			0.106229
				0.601296			0.0950198			0.122293			0.142803
				0.374361			0.136562			0.168868			0.134037
				0.471738			0.147005			0.135104			0.120993
				0.519883			0.141706			0.167639			0.146042
				0.604506			0.164318			0.178289			0.155611
				0.600092			0.160097			0.114509			0.0932256
				0.609972			0.194639			0.133131			0.137064
				0.378958			0.187229			0.099516			0.098956
				0.574716			0.179352			0.153271			0.126302
				0.483323			0.215238			0.171843			0.148327
				0.482922			0.190333			0.131842			0.150194
				0.766411			0.15257			0.165933			0.133506
				0.592753			0.219907			0.170574			0.1406
				0.574147			0.187697			0.187253			0.169414
				0.553268			0.158947			0.184903			0.193205
				0.771727			0.178073			0.158318			0.16344
				0.476034			0.160616			0.142065			0.149366
				0.543622			0.184183			0.21712			0.21551
				0.503902			0.172585			0.122739			0.0769017
				0.656947			0.15407			0.147579			0.138505
				0.635365			0.171293			0.213669			0.139138
				0.541348			0.155038			0.149046			0.164828
				0.499656			0.131854			0.185864			0.129422
				0.528443			0.156649			0.161937			0.154885
				0.390259			0.144096			0.181075			0.188902
				0.796117			0.182196			0.0984549			0.109642
				0.46801			0.216115			0.0561241			0.14736
				0.505574	Animal 5		0.503018			0.164666			0.10163
				0.443503			0.375373			0.113559			0.144471
				0.504353			0.490567			0.119876			0.132677
				0.584746			0.415245			0.156188	Animal 5		0.505069
				0.444422			0.47494			0.0943223			0.485032
				0.558834			0.474073			0.149187			0.432284
				0.619568			0.485055			0.148583			0.443942
				0.495593			0.429668	Animal 5		0.579343			0.444285
				0.508298			0.58819			0.429115			0.584783
				0.418394			0.547926			0.601632			0.406207
				0.4813			0.444176			0.476969			0.410015
				0.617562			0.629349			0.405171			0.430131
				0.597902			0.587336			0.494172			0.489354
				0.57515			0.503998			0.465919			0.527074
				0.591684			0.373484			0.724604			0.593679
				0.579263			0.58528			0.510114			0.46064
				0.542753			0.513091			0.472484			0.471002
				0.613717			0.393			0.419333			0.469441
				0.557915			0.509692			0.597526			0.611017
				0.462259			0.63605			0.447381			0.534533
				0.539091			0.590414			0.454596			0.495378
				0.492952			0.693059			0.573614			0.579696
				0.477338			0.544555			0.536769			0.509657
				0.397664			0.520632			0.42184			0.432081
				0.544909			0.374254			0.513105			0.558644
				0.685233			0.56291			0.523989			0.641339
				0.580884			0.49282			0.596159			0.52286
				0.49215			0.55646			0.505336			0.393535
				0.497198			0.545688			0.562852			0.500341
				0.561125			0.6154			0.46462			0.35605
							0.486888			0.684169			0.445908
							0.488259			0.652701			0.481224
							0.518953			0.426322			0.423545
							0.55113			0.60524			0.367115
							0.412628			0.453136			0.445409
							0.512168			0.557771			0.543397
							0.536692			0.56191			0.478633
							0.517106			0.540009			0.538403
							0.555817			0.420578			0.494114
							0.38192			0.607804			0.395018
							0.650795			0.430734			0.501246
							0.709666			0.571725			0.422609
							0.626523			0.499293			0.668945
							0.368602			0.504746			0.607755
							0.493575			0.475692			0.58945
							0.511258			0.57977			0.509423
							0.404906			0.444602			0.446688
							0.443812			0.42905			0.494036
							0.479347			0.463728			0.54733
							0.485685			0.608181			0.469363
							0.485517			0.508873			0.454554
							0.620521			0.533074			0.559611
							0.542358			0.791213			0.525419
							0.501661			0.430281			0.395954
							0.392161			0.487449			0.567758
							0.615512			0.465314			0.504835
							0.414419			0.486369			0.452665
							0.627138			0.630428			0.656757
							0.605649			0.538515			0.618866
					Animal 6		0.415563			0.609875	Animal 6		0.476772
							0.4917			0.545046			0.445918
							0.526289			0.447264			0.503544
							0.574191			0.495823			0.671452
							0.571027			0.50013			0.718556
							0.632654			0.569132			0.819906
							0.429126			0.479314			0.858769
							0.446707			0.415775			0.461712
							0.495333			0.524366			0.648165
							0.599003	Animal 6		0.556343			0.624806
							0.548817			0.592236			0.83182
							0.401035			0.451749			0.503655
							0.531598			0.658886			0.567023
							0.54478			0.563771			0.614929
							0.627536			0.622372			0.475242
							0.52441			0.645496			0.646155
							0.644741			0.707811			0.580269
							0.499986			0.64292			0.465947
							0.454129			0.799487			0.677805
							0.710594			0.763816			0.657209
							0.491878			0.684251			0.659026
							0.406219			0.69269			0.64204
							0.635056			0.59296			0.626542
							0.542591			0.672998			0.616601
							0.423754			0.628007			0.593793
							0.504356			0.703505			0.647481
							0.43098			0.557712			0.474708
							0.441882			0.809022			0.61563
							0.577724			0.624518			0.727849
							0.330648			0.569312			0.423448
							0.591133			0.485034			0.443161
							0.573686			0.465989			0.456146
							0.537429			0.768155			0.60033
							0.373519			0.560654			0.519835
							0.441786			0.6242			0.510396
							0.547835			0.637894			0.696712
							0.474137			0.552065			0.544639
							0.468634			0.717768			0.451267
							0.725861			0.675628			0.522179
							0.500358			0.697054			0.527095
							0.545527			0.564513			0.694417
							0.453806			0.487795			0.48826
							0.622395			0.702038			0.519359
							0.537892			0.588607			0.774121
							0.457286			0.563096			0.599151
							0.523542			0.752563			0.628485
							0.610329			0.694587			0.602396
							0.479858			0.751132			0.442723
							0.678209			0.601529			0.795059
							0.578972			0.729596			0.684335
							0.540241			0.752162			0.640699
							0.649228			0.556705			0.681315
							0.625801			0.740256			0.415291
							0.604973			0.441341			0.40944
							0.501395			0.533213			0.616156
							0.546521			0.597232			0.594051
							0.47605			0.648099			0.559367
					Animal 7		0.590103			0.664656			0.672079
							0.469742			0.56157			0.533709
							0.721532			0.530101			0.783471
							0.598961			0.715231			0.451845
							0.622257			0.568245	Animal 7		0.651098
							0.587596			0.598887			0.344905
							0.364556			0.692771			0.504035
							0.431774			0.649986			0.805727
							0.756612			0.62727			0.730901
							0.340936			0.592815			0.709611
							0.525611			0.738823			0.526224
							0.699392			0.627394			0.8658
							0.602902			0.95867			0.601358
							0.543102			0.586778			1.00272
							0.366772			0.794103			0.790208
							0.698472	Animal 7		0.613361			0.689877
							0.504132			0.47244			0.630601
							0.413924			0.640993			0.682562
							0.509321			0.78622			0.571072
							0.527864			0.536581			0.654212
							0.350784			0.715648			0.651488
							0.658007			0.85826			0.64035
							0.663539			0.515568			0.464495
							0.822638			0.357478			0.54027
							0.563329			0.611077			0.697254
							0.378488			0.573342			0.557507
							0.474946			0.550194			0.545219
							0.564667			0.561128			0.743825
							0.616763			0.417533			0.8356
							0.589389			0.553357			0.593869
							0.463214			0.706838			0.696072
							0.657289			0.622715			0.515211
							0.562249			0.686022			0.584368
							0.64023			0.668853			0.740054
							0.431137			0.563298			0.752956
							0.524235			0.35314			0.615322
							0.461355			0.7123			0.745734
							0.436619			0.405506			0.531807
							0.667135			0.758156			0.593184
							0.469516			0.530592			0.750363
							0.526356			0.701115			0.371611
							0.697844			0.389552			0.504583
							0.611363			0.78045			0.95839
							0.742727			0.615697			0.755988
							0.685307			0.528071			0.477094
							0.69679			0.542073			0.541087
							0.644867			0.544404			0.502644
							0.427511			0.758135			0.767957
							0.649406			0.764934			0.670449
							0.403959			0.51974			0.507354
							0.597023			0.539845			0.623243
							0.800378			0.497222			0.620285
							0.655016			0.84626			0.86077
							0.643634			0.674776			0.566533
							0.694794			0.503298			0.686477
							0.531081			0.70944			0.324303
							0.467947			0.698089			0.505672
							0.688619			0.5994			0.757759
							0.448332			0.80633			0.410635
										0.693235			0.784544
										0.653732
										0.503301
										0.558875
										0.69098
										0.676629
										0.390201
										0.719037
										0.95851
										0.472449
										0.700901
										0.376506
										0.660237
										0.563942
										0.728922
										0.714668
										0.717537
										0.502191
										0.579998

## Sheet: Flat-inclined Frequency 
15cm/s				25cm/s				40cm/s				50cm/s					Same data recapitulated for making the graph	15cm/s		25cm/s		40cm/s		50cm/s
Average frequencies for each animal (bursts/sec)
Flat		Inclined		Flat		Inclined		Flat		Inclined		Flat		Inclined				Flat 15cm/s	Inclined 15cm/s	Flat 25cm/s	Inclined 25cm/s	Flat 40cm/s	Inclined 40cm/s	Flat 50cm/s	Inclined 50cm/s
Animal 1	10.6838	Animal 1	8.88074	Animal 1	8.66507	Animal 1	9.52517	Animal 1	9.69504	Animal 1	9.24982	Animal 1	9.20924	Animal 1	10.4788		Animal 1	10.6838	8.88074	8.66507	9.52517	9.69504	9.24982	9.20924	10.4788
Animal 2	11.2939	Animal 2	10.8619	Animal 2	9.32837	Animal 2	8.85745	Animal 2	10.6965	Animal 2	9.95663	Animal 2	9.30773	Animal 2	10.3342		Animal 2	11.2939	10.8619	9.32837	8.85745	10.6965	9.95663	9.30773	10.3342
Animal 3		Animal 3		Animal 3	10.843	Animal 3	10.753	Animal 3	9.86245	Animal 3	10.7194	Animal 3	10.694	Animal 3	11.6202		Animal 3			10.843	10.753	9.86245	10.7194	10.694	11.6202
Animal 4	11.0456	Animal 4	10.2843	Animal 4	10.4004	Animal 4	10.4455	Animal 4	10.1686	Animal 4	9.73389	Animal 4	10.7421	Animal 4	10.251		Animal 4	11.0456	10.2843	10.4004	10.4455	10.1686	9.73389	10.7421	10.251
Animal 5	11.5619	Animal 5	10.8536	Animal 5	10.7371	Animal 5	10.6159	Animal 5	10.8717	Animal 5	10.4321	Animal 5	10.0292	Animal 5	10.7776		Animal 5	11.5619	10.8536	10.7371	10.6159	10.8717	10.4321	10.0292	10.7776
Animal 6		Animal 6		Animal 6	11.0219	Animal 6	10.9768	Animal 6	11.5857	Animal 6	10.5959	Animal 6	11.2532	Animal 6	10.4564		Animal 6			11.0219	10.9768	11.5857	10.5959	11.2532	10.4564
Animal 7		Animal 7		Animal 7	10.8746	Animal 7	11.5741	Animal 7	11.3031	Animal 7	9.9465	Animal 7	10.7635	Animal 7	10.4646		Animal 7			10.8746	11.5741	11.3031	9.9465	10.7635	10.4646
Mean	11.1463	Mean	10.2201	Mean	10.2672	Mean	10.3926	Mean	10.5976	Mean	10.0906	Mean	10.2856	Mean	10.6261		Mean	11.1463	10.2201	10.2672	10.3926	10.5976	10.0906	10.2856	10.6261
St Dev	0.373501	St Dev	0.932949	St Dev	0.908923	St Dev	0.915512		0.71857	St Dev	0.52283		0.78744	St Dev	0.467921		St Dev	0.373501	0.932949	0.908923	0.915512	0.71857	0.52283	0.78744	0.467921
Individual instantaneous frequency values for each animal
Animal 1	10.4385	Animal 1	7.06217	Animal 1	9.25926	Animal 1	6.68896	Animal 1	6.27359	Animal 1	8.71074	Animal 1	9.9404	Animal 1	14.0648
	9.09915		8.30562		8.6431		8.6281		8.66548		10		8.66548		13.55
	10.3734		9.8815		8.97679		8.1434		10.2879		8.53974		7.71015		12.0193
	12.21		5.8927		7.06207		6.60935		9.7753		8.87318		9.09915		9.80392
	11.601		7.15825		8		7.23592		10.4931		10.989		10.2987		11.5339
	10.4383		7.12247		10.1318		7.64523		9.38967		10.2564		8.71073		13.7742
	11.3765		7.96813		9.02521		8.03868		7.23071		8.99272		8.5984		12.6742
	10.0102		8.79514		6.60065		8.3962		10.5151		10.3307		8.21026		13.1752
	9.53284		6.42256		9.56938		8.8889		8.80286		9.77508		9.08268		13.4773
	6.92043		8.19674		8.71847		8.81057		7.62201		9.72756		7.9808		11.1484
	11.9048		6.39385		8.26445		8.98464		10.2987		9.46973		10.7297		12.7389
	12.3305		9.05809		8.99288		6.30123		7.86157		8.81057		7.96169		11.2485
	9.0171		11.5074		9.26764		7.34219		12.8701		9.03349		8.96861		11.5074
	13.55		8.33333		9.9603		6.64004		6.81658		10.5932		8.72588		12.6583
	12.8205		10.01		8.217		9.45208		9.58785		12.2549		7.71607		13.8696
	11.8343		10.142		11.3249		7.10222		10.2144		10.929		9.96012		13.5318
	10.0202		9.68048		10.4273		9.83293		9.49663		10		9.70872		12.8369
	11.7923		9.72772		8.75663		6.77034		9.31977		8.67297		11.2488		13.7365
	10.8461		11.7096		7.83091		8.75664		10.0402		9.97021		8.96045		13.6054
	10.8931		11.7232		9.56939		7.92396		11.1358		10.1114		10.5484		13.6986
	10.4603		9.74663		8.88887		7.6161		7.33672		9.47867		11.1859		10.5595
	7.97433		6.11241		7.61611		8.3682		10.6611		8.56159		9.46082		10.352
	12.5159		6.60935		9.45174		9.30233		9.60619		8.69566		8.88888		10.9289
	10.0605		5.95599		8.64308		6.81666		11.4024		7.81871		8.63553		9.78484
	13.4045		9.92054		8.86519		5.80052		7.98728		7.30989		10.5934		10.03
	11.8904		7.326		9.6342		8.45303		12.2099		7.53007		8.26447		12.5
	10.6383		7.15304		7.80654		9.16577		12.0337		8.79513		7.86144		10.989
	10.4823		9.38106		8.3962		8.62069		11.7098		8.29179		9.03351		10.2985
	12.3917		10.0704		9.38967		11.3636		10.2355		9.98012		8.90464		9.85222
	10.5929		8.21012		7.94291		10.1422		10.5263		10.2564		8.43881		10.5934
	10.9289		9.99025		8.91272		10.4273		8.11668		10.6158		8.44607		14.1436
	10.6498		9.65238		8.71074		13.0207		8.87319		9.7751		10.0906		10.2462
	9.82311		12.18		8.32629		9.34579		8.93665		9.93057		8.34747		10.3732
	12.0194		6.65349		7.45724		10.1733		12.6582		9.50579		9.55117		8.29876
	10.3627		8.98466		8.3611		11.2104		9.30231		8.57619		10.1935		9.64327
	9.98985		11.5342		7.02255		10.4494		8.38218		9.00902		11.976		8.09716
	11.8343		11.0008		10.2458		10.3201		9.93056		8.6431		8.70334		10.2041
	11.5077		8.41055		8.71845		11.7923		12.0772		8.49623		9.52378		9.15755
	11.7232		8.57621		8.85722		11.8623		10.2041		8.17656		8.34012		9.61541
	12.063		12.1069		8.61345		13.8124		11.2994		10.4935		9.31995		9.65236
	9.84236		11.5336		8.88887		9.80393		9.82309		7.9808		8.46729		9.68083
	10.2249		9.51495		8.77946		12.2846		11.6147		7.48494		8.5616		11.0861
	10.2457		9.79418		8.36819		11.0746		9.28478		9.2166		9.92056		10.3309
	9.67133		11.0254		8.62071		11.4942		8.82637		6.31709		9.01724		11.0373
	10.8461		10.1318		7.08218		11.7647		8.66534		9.02521		8.09717		10.2882
	8.81058		8.62795		8.32655		11.876		8.68061		9.77549		9.6154		9.7751
	10.9406		5.93816		7.34198		11.3511		9.53303		9.34577		8.8575		7.66284
	11.1111		9.90099		8.66563		10.5371		9.39829		8.8652		9.81332		10.5043
	8.79513		4.90441		9.25925		9.79456		9.85222	Animal 2	12.24		8.32656		9.93059
	8.51799		8.41025		7.46269		12.1063		10.3093		8.48891		10.111		8.05131
	11.7647		9.14091	Animal 2	10.142		12.2552		9.62481		9.2083		10.2989		8.53248
	10.8342		8.21012		11.5206		12.8863		8.77192		7.56434	Animal 2	8.49623		8.47458
	9.99999	Animal 2	12.7879		10.4385		11.3505		10.4819		6.65333		9.12412		7.03219
	11.8201		13.1403		8.01917	Animal 2	8.72588		9.38967		8.547		11.0252		8.52537
	8.93668		11.2867		8.35428		8.48919		7.6688		9.52382		7.15314		7.76984
	8.36109		10.352		9.30234		10.5151		10.8108		8.19672		10.4057		7.08219
	10.7644		12.0627		8.9927		9.73717	Animal 2	11.8623		10.1418		9.53303		7.49634
	10.8108		10.8934		9.09931		7.53006		10.2041		10.2355		9.44284		7.74583
	10.4494		11.8483		6.52737		8.96861		9.04146		9.14091		10.0704		7.47948
	9.95994		12.2849		7.93651		8.39622		9.33727		9.85222		8.75663		7.6336
Animal 2	10.8225		11.8343		9.15756		7.58742		11.9186		9.76538		8.71074		10.6952
	10		11.2741		9.6805		7.25685		10.8227		8.82607		12.7713		10.7068
	11.6279		10.2985		8.49622		9.62443		9.21658		10.4277		8.79513		9.74643
	14.0648		11.3636		9.68048		6.97358		10.6724		9.56935		8.55444		8.5251
	12.8867		10.5934		7.94277		8.52509		8.92856		8.95262		9.88149		7.6452
	12.2546		10.5151		9.39865		7.7821		11.4675		9.48746		9.64292		8.19017
	12.0194		9.23369		7.62766		7.43495		9.15758		9.73717		9.51496	Animal 2	10.5932
	11.1732		11.7096		6.60066		8.93668		12.165		10.1834		11.5471		8.56173
	10.3627		12.3761		9.56939		9.01694		10.0811		7.25171		9.96031		10.02
	12.7389		11.1983		9.99999		10.0605		7.59284		10.1729		9.7561		9.28512
	13.7741		10.6722		11.0866		7.25172		8.07113		11.3763		9.02521		7.86158
	11.9473		14.2654		8.99288		7.44597		9.34578		11.274		8.40336		8.60589
	9.97021		10.101		10		7.25685		10.1419		9.69		7.73998		8.68814
	13.106		8.59839		11.5206		10.1628		7.66283		11.0986		9.12394		10.5706
	11.8907		9.55117		9.69		9.85222		10.9057		10.2989		9.56044		12.3761
	10.4166		11.8201		10.0502		8.29177		9.53231		8.66533		9.02521		11.2236
	11.2995		9.84237		6.35315		9.19937		9.29422		11.0255		8.89692		12.4374
	10.352		11.1111		10.929		10.7527		9.354		10.5043		8.67296		11.5607
	12.9532		10.2355		9.64327		7.33146		8.42492		9.89106		8.45303		10.965
	12.1655		8.5765		8.07751		9.25059		8.51062		10.7297		9.63384		11.9331
	12.469		9.22488		9.05809		10.1627		11.5202		9.74681		10.4931		12.3154
	12.3761		10.9772		8.68061		7.94932		9.98049		10.0601		10.0302		9.56045
	10.3841		8.88889		10.2564		8.17002		9.9402		11.976		9.01725		9.77509
	10.6952		10.9768		10.5151		8.90435		9.69918		10.7758		7.83689		10.6836
	11.8907		8.24397		9.88151		12.1952		13.106		9.29388		8.70334		12.5
	9.23354		9.71832		10.3093		10.2985		12.4224		9.28512		7.50183		11.3767
	11.136		9.41628		8.84163		7.77643		13.3153		10.7064		9.10741		10.3951
	9.65255		9.41624		8.54699		10.3837		12.9535		11.6826		8.11051		12.5941
	10.5484		10.2143		7.59306		8.15029		14.948		10.8696		10.02		11.9475
	11.3765		10.989		12.24		8.18309		13.245		11.0741		9.69		11.2231
	10.7642		10.2355		6.85868		8.34039		11.4413		11.848		7.63359		10.6725
	9.72773		11.7923		9.16611		12.4842		12.469		10.965		8.02558		11.287
	9.49662		10.5263		9.00077		8.73362		12.3457		8.38216		8.31251		11.4286
	10.7876		12.7547		11.1237		7.48493		11.7099		9.8235		10.1627		9.45171
	11.4677		9.91096		9.65237		9.95025		12.2394		11.7507		8.57621		11.5874
	13.0042		9.95025		9.49661		8.87351		14.0259		10.1935		10.4061		11.5743
	12.7712		10.8932		10.3522		7.99999		11.9048		8.17005		9.94021		12.3761
	10.582		8.72618		10.0907		8.83368		12.5786		9.76577		9.50577		10.5484
	11.4416		8.90467		11.0866		10.1418		14.3265		10.2669		12.1505		8.59118
	10.8108		12.6582		8.15001		10.1733		13.2622		10.4494		8.89693		11.5607
	11.9475		11.1854		10.5263		8.59118		12.6582		11.1484		8.94448		9.55119
	9.46061		10.6613		8.90465		7.45139		11.5607		10.1418		10.3627		9.04145
	13.6243		13.4228		9.24222		9.28478		8.93668		9.5238		10.0907		9.19112
	9.92057		10.1935	Animal 3	12.0482	Animal 3	12.3761		8.51064		11.8626		9.8522		9.35469
	11.6687		12.8863		10.2353		10.6724		8.77915		10.977		7.57017		9.46079
	12.1652		9.45206		13.986		10.8458		8.03214		8.46729	Animal 3	10.3201		9.29355
	11.0619		14.4502		13.587		11.7235		10.2885		9.51477		7.96813		9.40692
	12.4845		11.6555		10.5263		10.3841		10.2985	Animal 3	8.23734		9.14057		10.7999
	10.3736		8.81055		10.4275		9.90102		8.75631		10.905		7.48516		10.3728
	8.53248		12.642		11.0988		11.0866		10.0606		10.1937		7.84916		10.4277
	10.6268		11.2488		10.627		11.1234		9.45208		6.92042		10.9173		9.28545
	11.0497		10.1623		10.3951		11.5607		9.33692		11.9189		12.3		10.8695
	11.3768		11.5607		8.79497		11.6685		10.6383		6.92518		10.1728		9.03318
	10.672	Animal 4	11.976		10.977		8.08412		12.9032		8.27823		9.00078		9.25925
	11.8766		11.7098		10.6044		12.255		9.73677		10.4492		8.98498		10.8696
	10.2041		8.88087		8.84954		10.7874	Animal 3	10.7876		9.09091		9.00902		9.36358
	11.1358		9.90099		10.7068		9.00092		10.5484		8.47458		10		8.33331
	11.1986		8.62825		12.1506		8.00001		11.4156		10.9052		9.99998		10.4057
	13.4766		10.799		10.8696		8.58367		11.3508		7.94906		9.3718		9.96962
	12.7719		10.1834		8.62069		9.85223		10.3199		8.58371		9.10773		8.92111
	9.35433		10.4821		11.9331		7.96813		11.0011		9.83292		7.8125		10.1935
	11.6279		7.66285		12.3457		7.59306		10.6838		8.57634		10.582		8.84161
	12.2852		11.6959		10.4385		13.4228		10.8344		10.3841		9.46048		10.672
	10.6836		11.0376		10.1418		11.468		11.2738		8.5837		9.14938	Animal 3	10.4494
	9.84274		11.274		8.56187		12.1656		11.3897		8.97662		9.02522		9.28512
	9.53268		10.6952		11.9331		10.6158		10.6156		9.25075		9.60598		13.1403
Animal 4	13.3156		10.6609		9.82311		10.741		11.468		10.5043		10.2355		10.627
	10.6836		13.8121		13.6613		9.28512		9.9404		9.36325		8.07112		12.5
	11.7926		9.08266		12.1801		10.0907		10.6952		8.80283		9.53269		13.7173
	13.106		14.2654		9.41627		12.6582		10.5484		10.929		12.2102		12.7224
	11.6145		12.3761		10.2564		11.7098		10.6725		11.2488		9.3983		12.7879
	12.5156		13.986		8.40336		12.6739		8.21012		8.60562		10.8696		13.3333
	13.4228		13.6986		8.17657		12.6745		9.26781		10.3846		11.4552		13.3688
	8.76429		5.93128		13.5135		11.2488		9.93056		6.53162		11.1358		11.9618
	11.7232		10.5371		13.8124		9.95994		9.66183		12.4067		8.96861		9.19128
	11.7647		11.0255		9.38969		14.6629		9.97021		9.44301		11.5341		8.6504
	12.6746		9.0581		9.91055		10.5484		9.1827		10.9052		10.6154		11.0622
	13.0889		8.26445		8.76442		10.2147		9.7751		9.19112		10.6048		11.6959
	9.67115		9.1997		9.45173		10.2457		7.96813		7.85541		11.6005		9.24206
	14.9032		11.2104		12.1362		13.4588		9.59699		14.8811		12.1511		14.0451
	13.5317		4.71698		12.2394		11.0254		9.38968		12.3148		12.3456		14.706
	9.23354		6.789		8.45332		8.41745		8.90466		13.7177		9.85222		10.989
	11.2868		16.4736		10.8108		9.18254		7.63358		11.601		10.5039		12.8533
	14.4719		7.99375		10.8346		13.4052		10.7527		11.3636		12.4848		11.1984
	11.8343		7.66284		12.0188		12.7713		8.91272		10.8222		10.9768		9.6246
	11.8766		5.73066		11.6152		11.2994		10.6838		9.443		10.4824		8.66547
	13.8121		8.20328		11.0497		7.02738		10.288		11.9192		9.08251		9.91079
	8.73361		9.84237		10.3837		7.88031		9.73717		10.7064		11.4026		10.9411
	12.8533		13.5135		13.0041		12.3154		8.62809		11.8623		10.4931		13.1235
	8.78729		9.67133		10.2671		13.9464		9.96013		14.9037		13.1932		11.2612
	11.601		8.45275		10.6836		10.0302		9.54207		13.5867		11.7782		11.5607
	11.236		13.0893		8.64284		8.05159		8.82609		11.4814		12.5472		12.9195
	12.24		8.23047		11.7788		8.18336		9.83292		12.0334		11.9048		13.8125
	11.2483		9.50612		7.78208		10.111		10.6154		12.3917		13.0893		14.2452
	12.3006		10.9645		7.26736		12.3154		9.90099		13.1925		13.2973		8.14328
	10.3409		8.48188		12.5787		12.0047		8.65801		13.5686		11.1859		9.32842
	12.1069		10.2146		14.3273		11.8207		9.74681		11.6549		10.6724		9.80394
	7.73391		11.8475		12.4538		11.8343		8.83399		11.6959		10.3414		13.4045
	9.68998		12.7554		12.0766		7.63929		9.97		11.6959		14.9918		10.5597
	10.4819		6.20364		10.5489		11.6279		7.83689		10.1114		13.6432		11.1859
	12.3917		10.548		10.6836		12.8045		9.50579		10.3841		13.1748		12.5
	10.2989		8.6062		11.4808		10.8461		11.4942		13.3688		13.4228		11.4942
	11.0616		9.16577	Animal 4	9.40727		9.32809		9.9801		11.3637		12.1656		12.8045
	12.6426		9.10708		8.80285	Animal 4	10.8696		8.65801		13.4588		12.27		10.929
	9.39829		14.882		10.0503		8.03856		10.6952		13.986	Animal 4	8.82606		11.1358
	10.2249		11.8617		11.0866		8.2919		9.13243		14.3265		9.46081		9.65236
	10.6613		12.8051		11.2485		10.1316		8.83398	Animal 4	9.03333		9.08268		11.6687
	10.5484	Animal 5	12.5156		9.82312		11.2488		8.76412		9.0171		9.3371		11.9761
	9.63384		13.8697		10.2669		9.97001		9.97003		9.93056		9.14073		14.9036
	10.3093		12.4689		10.5934		10.1214		10.3522		7.44045		9.90099		14.0845
	11.9192		12.0191		9.44283		5.95597		9.14907		8.59853		8.68046		11.1732
	11.2231		11.7235		11.1358		10.7181	Animal 4	9.3545		10.3412		9.28512		11.1605
	12.4381		12.3305		8.72603		11.0741		10.4933		6.13497		11.8763		9.36323
	10.989		11.6142		9.82312		10.101		7.95538		10.3413		12.407		11.9331
	9.52382		13.587		12.3764		10.7992		11.6959		8.18323		11.8343		11.7788
	9.1743		12.1656		12.2248		11.3251		9.76577		8.91273		12.24		13.298
	11.0131		12.1506		8.16991		9.60601		10.3949		8.83398		10.0805	Animal 4	10.4712
	10.9052		11.8906		9.86209		7.8494		8.40335		9.91077		15.0833		12.9032
	11.0622		12.9535		10.04		7.84926		9.69		11.1984		12.5944		9.23354
	9.0661		10.1214		10.2564		12.9703		9.16594		7.01255		14.0447		9.91096
	6.87747		10.1214		12.255		9.78461		9.16579		10.4712		12.255		10.2564
	9.72792		5.98447		9.63384		11.9333		7.36924		10.0102		12.0338		10.7527
	9.69916		19.0475		8.75663		10.0704		11.0497		11.682		14.7274		11.1111
	12.642		13.7553		11.4286		13.9078		7.91136		10.0503		9.62478		12.5315
	10.8581		13.3333		8.23045		12.1212		8.97663		8.40336		12.4842		9.31095
	6.64003		10.9409		10.3305		13.6243		10.953		9.90099		11.1986		10.1112
	8.41054		12.3917		9.73719		10.8108		9.51477		9.82311		10.2985		8.46743
Animal 5	11.0497		12.5469		11.5738		9.79417		8.96863		10.741		9.87159		10.2249
	11.7232		12.3003		7.02255		8.53247		10.6268		11.4158		11.7372		9.03351
	9.34579		9.89104		8.77974		10.1523		8.92857		9.95992		9.37214		7.97446
	13.3333		7.8309		10.3732		8.1368		11.6279		8.88888		10.0502		11.4416
	13.6243		7.22551		9.38108		10.4601		9.87197		6.94444		7.20458		9.15755
	12.3606		11.0497		9.42493		12.092		9.57833		12.1506		9.63381		7.98715
	10.929		8.88087		8.6207		11.7232		10.4931		9.38965		10.1523		9.12414
	10.684		6.06794		10.1728		12.0772		10.0404		10.2462		9.23357		7.8865
	6.734		8.51064		10.2671		13.1579		9.89104		10.111		8.58367		12.063
	15.8221		8.76441		7.8554		12.7066		9.78481		8.55442		8.76443		10.3093
	16.026		10.6952		10.5598		11.6279		9.75611		11.2741		8.74109		9.86209
	13.8889		6.76122		13.0035		10.02		9.25056		7.52433		10.3845		12.0188
	12.8205		9.63421		9.8815		10.5489		9.11582		10.101		8.47457		8.21699
	12.24		10.1418		10.0605		10.7064		10.6725		9.02551		10.5039		10.6044
	12.6102		10.1628		10.7758		10.3201		9.22521		9.0578		9.73717		11.1111
	10.2671		10.9645		11.7507		10.9406		10.8931		11.2109		12.6258		10.5376
	10.672		11.6549		10.4605		8.83398		11.5874		11.1479		10.1939		9.31957
	13.6986		10.3518		11.5341		6.80742		9.68049		9.04977		10.6724		8.71076
	11.8207		9.85222		11.1111		11.4413		10.9173		9.1997		12.2248		9.25926
	11.933		14.2452		11.0373		11.1237		10.9768		7.98728		10.0601		9.04178
	9.98986		6.93973		10.9528		13.2102		11.6549		11.274		10.2147		9.61539
	13.9085		6.13866		12.6745		12.0193		10.5371		10.111		10.6836		10.04
	13.8889		9.34579		11.7232		9.11552		10.6048		10.7762		11.7929		10.989
	13.387		10.4605		11.0497		6.91088		9.90099		9.46046		11.1232		8.61346
	10.2667		10.764		11.6687		10.0302		10.5039		9.73717		11.2741		10.1214
	13.7931		5.85826		10.111		10.9768		10.4605		10.2671		11.8201		13.0719
	6.08279		13.55		9.23387		12.2699		10.0907		9.56009		9.37214		12.7389
	12.8038		13.1755		11.2736		11.5477		10.4061		9.30233		14.0451		9.67096
	14.2049		9.44266		9.17431		11.1232		10.6154		11.8628		11.2865		9.35467
	13.0379		11.2236		12.9371		14.1444		10.0708		10.3627		9.09092		8.36109
	12.0335		12.4067		11.6959		6.00967		11.3636		12.3148		13.316		13.1755
	12.5312		9.63384		12.6903		11.5738		9.24189		11.2109		11.9615		11.0131
	10.3845		12.6909		10.6836		7.81871		14.1444		9.00903		11.4547		9.19971
	11.9331		8.9686	Animal 5	8.56904		8.71074		10.1834		10.9052		10.8461		9.9801
	11.4943		10.929		7.05701	Animal 5	12.0338		9.76577	Animal 5	10.101		10.1318		9.58765
	6.90604		13.7546		11.7929		9.597		11.8201		11.0863		10.6498		8.07087
	10.1834				9.8617		8.90466		9.80392		11.7372	Animal 5	9.74663		14.4095
	11.9048				11.0497		9.09915		13.986		13.0549		9.24221		12.18
	11.1981				9.3458		9.15757		10.582		8.55429		8.1037		11.0746
	11.4158				9.71834		10.8696		9.96031		11.3636		9.11566		9.71794
	12.6739				12.4067		10.3199	Animal 5	12.6261		9.86189		9.31978		10.3627
	10.4061				9.78482		9.88149		12.5315		8.91272		10.2879		8.17657
	12.7389				8.59118		10.6044		12.6261		12.3151		6.99799		10.3201
	11.5874				9.67094		9.58766		13.9278		11.8065		11.6279		11.236
	13.6424				11.0622		10.3413		12.4686		8.6806		8.41745		14.3474
	10.2249				11.7782		9.97003		11.2234		12.5156		8.69566		10.8341
	11.0131				9.16612		12.8866		11.9476		10.2353		10.7992		7.94908
	10.5155				10.2142		11.5075		13.2976		8.0645		7.86157		11.9621
	11.6142				12.9706		10.0301		14.2857		12.1804		11.0621		9.95025
	12.8205				11.7647		9.13242		11.4026		9.59697		9.53284		9.97
	11.5607				11.3249		11.8065		12.2248		13.55		8.23721		10.5263
	9.68047				8.8889		12.3302		10.5932		11.6145		11.4416	Animal 5	10.0603
	6.68459				11.1357		10.0202		10.6838		11.3765		11.2234		9.3371
	11.4286				9.1074		9.61541		11.0011		10.0502		9.87157		10.3305
	11.5341				11.2237		12.092		10.3307		7.82482		10.7527		13.4772
	9.17431				11.5341		11.8904		10.5709		12.3609		10.173		10.5041
	8.50328				11.7647		10.7297		10.582		9.97989		10.5263		10.8696
	12.0335				9.75611		11.6147		9.90098		13.1928		8.84956		9.41625
	13.4053				8.90464		11.0741		10.1112		10.8932		9.737		11.0497
	11.1854				8.67298		10.6044		10.142		10.3199		11.6823		11.6685
	11.7512				8.20355		10.2774		10.2879		8.2237		9.80393		10.6383
	8.72588				10.1314		9.41628		8.39633		11.4286		7.95549		11.6687
	12.5632				9.27637		9.51461		11.0131		8.67312		12.4532		8.61328
					9.96031		10.2671		12.2251		8.54701		8.93668		13.4408
					9.07447		9.65234		9.38091		10.4824		13.6424		10.718
					9.71795		10.858		12.3151		9.31078		11.5206		11.6417
					8.30574		11.1605		9.32842		10		8.74885		9.04147
					9.40727		12.3308		11.6144		9.1661		9.89144		13.4228
					9.74644		11.3894		10.2249		12.4374		10.6494		10.4277
					10.5597		11.274		10.6271		9.63383		8.45303		10.4601
					10.2989		11.4153		9.32824		10.965		12.9706		10.9411
					13.6235		11.468		10.3201		8.27808		9.88147		12.4532
					13.55		10.3841		12.1212		9.73717		8.70304		8.71846
					13.4957		13.6054		12.3302		11.1237		11.161		12.9032
					12.1951		9.38071		11.7788		9.61539		12.0188		10.5043
					10.1214		8.24397		11.236		10.6836		11.7788		7.23572
					8.72618		9.03349		12.2397		9.52382		11.1981		8.74138
					10.6952		9.87159		12.1655		8.28506		9.43397		11.8486
					10.8576		9.54191		12.0627		11.7232		9.60636		8.74109
					12.1212		11.0013		11.1856		10.2671		9.69916		8.88888
					14.4715		8.94448		11.4811		10.0807		10.0503		10.989
					12.7554		10.4057		13.7173		8.31924		10.2041		8.49624
					12.5947		9.7468		8.13008		10.8108		10.4383		9.23352
					10.9048		10.4273		11.0373		11.351		10.2147		12.1069
					10.0301		10.2249		9.18287		10.3841		10.2355		9.25055
					10.5263		11.1986		11.3119		9.76579		8.62069		9.56938
					10.8461		10.5707		9.15758		11.0008		10.4712		8.23734
					16.129		10.3951		9.62479		9.76577		9.38071		10.3197
					13.4046		10.4712		10.5263		11.4026		8.06453		9.62479
					13.0213		11.3894		9.3196		11.3375		12.5159		8.61344
					11.1732		12.0193		8.65041		12.8701		9.72756		13.4228
					10.449		11.6687		7.9365		9.2166		9.90098		11.4153
				Animal 6	11.1237		11.9186		10.9411		9.85223	Animal 6	11.8766		12.063
					11.9048		11.4813		10.2774	Animal 6	10.0503		10.9772		11.0617
					12.0335		11.0861		10.6272		10.989		14.684		9.53304
					11.3124		10.4494		8.28479		10.2774		11.7923		12.3606
					10.6498	Animal 6	10.6724		10.9411		9.66184		10.1729		12.0629
					14.8803		10.4277		8.52508		9.55116		11.6825		12.3457
					11.351		9.97001		8.50356		10.9768		12.6902		11.7098
					10.7989		11.2109		9.59665		10.3951		10.3093		11.1479
					11.8206		9.78481		12.7389		8.83397		10.8227		11.0136
					10.989		11.2104	Animal 6	10.6158		9.62477		10.9406		10.3627
					12.5153		9.08284		10.4492		8.00627		11.8343		14.684
					11.4814		9.45175		10.4385		9.73716		10.0601		10.2147
					11.4547		11.8766		10.2879		12.1505		12.8205		11.3894
					12.0482		11.9615		10.6724		10.3413		11.2994		12.8701
					11.0254		10.8341		10.0603		9.41627		12.723		10.6494
					13.6236		10.6158		11.7372		9.33692		13.5867		10.2355
					11.9906		10.6724		11.8062		10.8696		12.7066		13.2102
					10.7876		9.14907		10.4385		11.0621		13.4588		10.5263
					13.0207		12.3612		11.8483		11.4809		12.1951		10.1728
					12.9365		11.3505		12.3151		11.3124		10.3414	Animal 6	11.4541
					11.6549		12.3457		9.26781		10.4712		10.4819		11.7377
					11.1484		12.2699		12.092		10.1935		11.8623		10.0803
					12.9365		10.6836		13.3511		8.63552		11.0008		8.77193
					11.1981		11.6687		12.9032		11.2488		8.56904		11.4153
					11.0013		10.7068		10.1318		9.5694		10.1214		11.0259
					8.71846		9.84237		11.6684		11.4546		11.9336		10.989
					10.3947		10.8461		11.4026		10.02		10.111		9.24187
					11.8485		12.9699		13.5317		11.9048		11.9475		10.3093
					11.8201		10.5489		12.4535		10.6498		11.2994		9.29355
					11.2995		11.4808		9.32843		10.582		10.3842		8.95293
					10.0605		9.66182		12.5		11.1732		11.6279		13.3514
					11.8065		10.0907		9.50577		10.5043		11.7098		9.28475
					10.582		10.0503		12.3302		10.3201		10.1834		13.245
					12.5153		13.7931		10.6498		10.2774		13.7546		10.1314
					9.51496		12.1212		12.18		11.4809		10.582		11.8343
					11.5071		10.5597		13.298		11.6826		10.7527		10.2359
					11.2741		10.7994		11.0378		8.71074		9.76575		10.7527
					12.0772		10.7063		13.1748		12.4224		10.1523		11.1732
					11.8065		11.1358		9.79456		9.67131		11.2865		12.4683
					11.7232		10.6383		9.78442		13.6986		10.6725		9.85222
					11.7093		9.42527		12.7872		10.8696		10.7527		10.3201
					10.7185		10.5371		10.8108		9.25925		12.5153		10.4819
					10.2877		10.3736		14.5562		13.986		9.42528		11.236
					8.74915		11.6279		12.4073		10.101		12.1212		10.5489
					11.0008		12.8533		11.5874		10.9168		11.8059		9.25057
					10.7758		10.858		11.8343		10.5263		12.1951		9.31112
					9.70874		10.799		10.4167		10.3414		10.3627		8.41027
					10.4387		10.0704		13.3333		10.1935		9.99025		10.3522
					10.6952		13.6424		12.5		9.95025		11.6687		8.6803
					8.29876		10.7527		11.2741		9.28513		11.7367		11.3254
					10.929		11.351		12.6902		12.18		10.4061		9.46956
					7.73998		10.8222		10.1834		12.1951		9.90099		10.4601
					9.72755		12.063		11.2994		10.4387		9.25926		9.91094
					8.75662		11.7647		11.4153		12.6583		13.9662		10.9168
					9.50542		12.1212		10.8461		11.1357		10.3093		10.4061
					9.06644		10.965		10.4167		9.82311		10.8341		12.0624
					7.50732		10.6838		11.0741		10.1628		9.65273		10.8461
				Animal 7	12.6102		13.9081		12.7066		11.3249		10.4494		11.1981
					10.8461		9.51478		9.96031		10.593		11.0617		8.08413
					9.69		9.04162		14.7059		9.9801		10.9411		11.0991
					12.0624		9.901		11.1854		11.0866		11.9186		8.84956
					12.2853		10.2987		9.29389	EMG34	9.96012	Animal 7	9.84237		10.0098
					13.4228		10.3841		13.55		10.3093		11.3768		8.9526
					12.1655		10.6609		10.989		8.43882		10.582		10.7409
					10.5485		11.6145		11.8766		8.54701		9.9402		11.338
					10.741	Animal 7	9.39829		12.1212		8.58368		9.68998		8.56905
					12.887		10.7876		11.7366		8.51786		8.68061		11.0497
					12.6582		11.1111		12.1511		9.72756		9.85224		13.5687
					14.1039		10.6498		12.7547		7.7943		9.34578		10.0302
					10.7644		8.68798		12.3917		9.26782		10.7644		10.2041
					11.5206		8.35426		11.6279		11.1111		11.976		9.16578
					11.0497		8.59839		12.3612		7.91137		11.5077		12.7389
					9.82311		8.98467	Animal 7	11.8904		8.66548		11.7093		11.0866
					11.1732		7.87401		11.6959		8.48188		11.4552		9.28512
					13.7745		9.73719		12.6108		10.1418		11.0861		10.449
					10.9528		9.99024		10.04		8.21028		11.0621		10.3627
					10.5043		8.57622		8.85751		8.31937		9.98011		10.101
					11.5607		8.50328		10.0804		10.0605		9.48748	Animal 7	13.2102
					12.4532		11.6687		9.70872		9.50561		10.6498		10.3305
					10.8456		7.23574		8.95261		9.09913		13.1061		8.93668
					13.7177		8.25113		11.2488		9.03348		10.6158		10.7871
					10.7176		10.9048		9.41628		8.84177		11.0619		10.3736
					11.4685		12.4845		8.74884		10.0402		10.4821		13.1403
					10.2671		13.8697		9.59703		7.96814		10.5043		13.4772
					11.2736		13.0889		9.04144		8.1565		9.7751		11.0991
					11.0135		13.8311		8.85754		9.16594		10.5263		9.50542
					12.1952		11.7647		9.60598		8.59104		12.1358		11.6687
					10.4601		14.5562		10.1935		9.77528		12.4535		11.4158
					9.33694		14.684		9.5787		10.2774		10.6952		10.6609
					9.77546		11.1362		9.41627		9.85222		10.8108		10.5263
					14.4079		11.2483		9.29355		9.80392		10.1316		10.1418
					9.28549		9.39866		6.55319		11.8343		12.2699		8.39648
					8.08387		11.8343		11.7506		8.66561		10.4277		11.1232
					12.3457		13.0035		9.7848		9.97003		11.4153		10.2989
					11.9615		12.9202		8.71075		7.86168		10.4603		10.04
					13.9281		12.9535		10.2457		12.3456		10.3844		9.54191
					12.7389		10.3841		11.4418		9.208		9.55097		8.53248
					9.09931		12.5947		11.6142		9.93055		9.56029		12.9201
					11.0013		14.6194		9.9704		10.5043		10.8108		10.3732
					9.7561		12.7553		9.57834		10.3305		12.2249		9.40728
					9.71832		13.9078		13.8311		9.94022		11.2614		11.9336
					9.13242		10.2147		12.7389		12.2841		9.17431		12.4067
					9.92016		11.7647		12.6905		11.4819		9.43395		10.684
					9.25926		14.6839		12.0047		11.6279		10.3627		10.4601
					8.13678		12.034		12.4224		11.7647		11.3508		10.3518
					8.4819		13.0379		12.3154		10.1314		11.3505		12.6108
					7.71595		12.0914		12.2099		10.7989		10.3736		11.7507
					11.1859		9.58801		12.9198		11.4686		10.7066		9.83292
					9.47871		12.642		11.4943		12.8527		11.1358		8.66533
					9.9402		12.8701		11.7235		12.9541		11.2867		8.55443
					9.35467		11.1854		13.0039		12.36		9.79436		9.65235
					10.9768		12.7388		10.7295		10.7184		11.1234		9.87197
					10.8936		12.9202		11.9047		11.6417		10.101		9.07416
					8.8416		12.4381		12.8537		12.3302		10.776		9.39864
					8.67268		11.7782		10.9647				10.7066		9.5238
					8.61372		10.5376		13.9278				12.0772		9.63384
							13.4588		12.755				13.3511		9.8815
							13.495		12.18						12.4532
							13.4052		13.4411						9.67133
							12.8701		11.0373						9.1743
							13.6796		10.929						9.97993
							11.8904		13.3514						9.55117
							12.2852		13.3153						10.4492
							12.0629		13.1235						12.0629
							10.4273		11.5077						11.1732
									11.1981						11.1234
									11.7093						9.01708
									12.4073						10.6952
									11.7507						11.3508
									13.6055						10.0603
									13.55						9.68998
									12.6264						9.52382
									12.0047						9.3458
									12.3457						9.95026
									13.0379						11.4809

## Sheet: Flat-inclined Ti 
15cm/s				25cm/s				40cm/s				50cm/s					Same data recapitulated for making the graph	15cm/s		25cm/s		40cm/s		50cm/s
Average inspiratory Ti times for each animal (ms)
Flat		Inclined		Flat		Inclined		Flat		Inclined		Flat		Inclined				Flat 15cm/s	Inclined 15cm/s	Flat 25cm/s	Inclined 25cm/s	Flat 40cm/s	Inclined 40cm/s	Flat 50cm/s	Inclined 50cm/s
Animal 1	30.1517	Animal 1	34.1019	Animal 1	35.448	Animal 1	31.9019	Animal 1	31.075	Animal 1	27.4292	Animal 1	30.1755	Animal 1	27.4106		Animal 1	30.1517	34.1019	35.448	31.9019	31.075	27.4292	30.1755	27.4106
Animal 2	28.0742	Animal 2	27.1541	Animal 2	36.534	Animal 2	32.602	Animal 2	28.3288	Animal 2	32.6051	Animal 2	37.4865	Animal 2	27.8667		Animal 2	28.0742	27.1541	36.534	32.602	28.3288	32.6051	37.4865	27.8667
Animal 3		Animal 3		Animal 3	20.3119	Animal 3	26.0333	Animal 3	29.7071	Animal 3	26.2746	Animal 3	28.4932	Animal 3	20.5585		Animal 3			20.3119	26.0333	29.7071	26.2746	28.4932	20.5585
Animal 4	23.177	Animal 4	24.937	Animal 4	22.2293	Animal 4	24.0086	Animal 4	24.6357	Animal 4	26.6418	Animal 4	24.1237	Animal 4	25.6726		Animal 4	23.177	24.937	22.2293	24.0086	24.6357	26.6418	24.1237	25.6726
Animal 5	25.6683	Animal 5	23.3036	Animal 5	24.9695	Animal 5	25.3129	Animal 5	27.2426	Animal 5	30.5492	Animal 5	30.2911	Animal 5	29.1933		Animal 5	25.6683	23.3036	24.9695	25.3129	27.2426	30.5492	30.2911	29.1933
Animal 6		Animal 6		Animal 6	28.3211	Animal 6	27.5918	Animal 6	26.8746	Animal 6	29.8817	Animal 6	28.0164	Animal 6	28.419		Animal 6			28.3211	27.5918	26.8746	29.8817	28.0164	28.419
Animal 7		Animal 7		Animal 7	22.078	Animal 7	20.0367	Animal 7	22.7286	Animal 7	24.0491	Animal 7	22.8393	Animal 7	23.331		Animal 7			22.078	20.0367	22.7286	24.0491	22.8393	23.331
Mean	26.7678	Mean	27.3742	Mean	27.1274	Mean	26.7839	Mean	27.2275	Mean	28.2044	Mean	28.7751	Mean	26.0645		Mean	26.7678	27.3742	27.1274	26.7839	27.2275	28.2044	28.7751	26.0645
St Dev	3.0144	St Dev	4.75466	St Dev	6.57947	St Dev	4.4093		2.86494	St Dev	2.93572		4.79014	St Dev	3.11808		St Dev	3.0144	4.75466	6.57947	4.4093	2.86494	2.93572	4.79014	3.11808
Individual Ti times for each animal
Animal 1	27.1	Animal 1	28.7	Animal 1	29.6	Animal 1	47.6	Animal 1	46.7	Animal 1	27.2	Animal 1	29.8	Animal 1	17.7
	31.8		37.6		28.4		43		44.5		21.9		27		14.9
	24.7		30.2		37.5		48.7		28.5		23.7		29.8		23.3
	24.7		48.6		35.2		56.6		38.8		34.5		33.6		19.6
	28.2		34.6		30.7		41.9		26.2		19.3		32.6		18.6
	29.4		45		31.8		43		35.3		11.4		35.4		15.8
	37.7		35.4		43.2		32.9		46.7		20.1		33.6		21.4
	32.9		36.2		36.4		35.1		25.1		15.8		28.9		23.3
	27.1		59.7		31.8		35.1		36.5		27.2		31.7		18.6
	31.8		31.7		31.8		36.5		36.5		29.8		27		25.1
	29.4		41.9		35.2		34		36.5		23		28.9		11.3
	36.5		42.7		33		54.4		42.2		27.2		36.2		21.4
	30.6		42.7		30.7		37.4		31.9		28		27		18.6
	25.9		38.3		28.3		43		41.3		25.4		32.6		23.8
	24.7		28		30.9		34		33.1		25.4		28.9		18.6
	28.2		33.2		34.1		39.6		33.1		21		28.9		16.8
	30.4		21.4		27.3		46.4		25.1		20.1		32.6		19.6
	24.7		21.4		35.2		36.2		28.5		25.4		24.1		22.4
	28.2		36		40.9		38.5		16		24.5		29.9		23.3
	38.8		31		33		36.2		36.5		29.7		31		17.7
	22		26.5		37.5		38.5		28.3		23.9		27.6		23.1
	29.6		39.3		40.9		41.3		31.9		33.5		32.2		17.7
	28.6		35.6		35.2		43		36.5		31.6		36.8		22.4
	28.6		32		27.3		47.6		23.9		43.1		26.4		30.7
	21		24.7		33		38.5		30.8		39.3		34.5		29.8
	28.6		37.5		27.3		38.5		29.6		29.7		49.4		21.4
	29.6		29.2		43.7		37.4		25.1		38.3		31		28.3
	30.5		28.3		39.5		34		20.6		23.9				32.2
	28.4		35.6		38.5		27		36.3		23				26.4
	23.9		24.7		35.3		24.4		42.2		22.2		33.3		26.4
	30.5		32		40.5		20.9		35.3		20.1		25.3		27.3
	26.7		30.2		37.4		22.6		27.4		27.8		31		27.3
	23.9		21		34.5		31.3		28.4		32.6		29.9		29.3
	29.6		46.6		40.5		15.7		28.4		30.7		21.3		23.4
	25.8		35.6		40.5		18.3		37.3		23.9		27.2		25.4
	32.5		30.2		36.4		27.8		24		31.6		28.4		24.4
	27.7		31.1		33.3		20		23.5		29.7		16.6		30.3
	29.6		25.6		33.3		22.6		28.4		32.5		28.4		36.1
	33.4		28.3		32.2		22.6		27.4		26.6		28.4		27.3
	32.5		27.4		35.5		20		29.4		32.5		30.8		30.4
	37.2		27.4		36.4		24.4		16.7		27.5		35.5		25.5
	31.1		36.5		35.9		16.5		30.4		31.5		28.4		27.4
	33.7		34.7		42.6		21.7		23.5		32.5		29.6		30.4
	32.4		32		40.5		20		29.6		33.4		26.1		28.4
	29.9		30.2		41.6		19.1		29.4		29.5		28.4		32.3
	31.1		24.7		36.4		19		25.5		29.5		25		26.5
	31.1		45.1		39.5		20.9		20.6		23.1		29.6		30.4
	23.4		35.6		35.3		18.3		27.4		32.5		39.1		25.5
	36.3		40.3		37.4		23.5		19.6	Animal 2	37.5		26.1		27.4
	44.1		36.8		39.5		20		37.3		37		32		33.3
	28.6		47.5	Animal 2	35.4		24		42.2		31.5		30.8		34.8
	32.4		36.8		34.1		23.5		27.4		37.5	Animal 2			32.1
	31.1	Animal 2	25.8		35.4		27.8		30.4		35.7		24.1		36.2
	31.1		29.9		43.2	Animal 2	33.1		30.4		42.5		30.1		32.1
	33.7		28.9		40.6		25.5		32.3		42.5				45.5
	29.9		29.9		41.9		30.6		33.8		37		33.7		36.2
	36.3		32		41.9		31.9	Animal 2	17.9		28.8		32.5		40.2
	33.7		26.8		44.5		28		34.6		38.4		33.7		44.2
	28.6		24.8		56.1		29.3		33.4		30.2		30.1		25.5
	37.6		28.9		35.4		33.1		22.6		35.7		33.7		48.2
Animal 2	32.5		26.8		38		26.8		26.2		37		26.5		38.8
	29		28.9		43.2		31.9		34.6		37		25.3		36.2
	25.6		20.6		38		34.4		21.4		38.4		32.5		36.2
	19.8		24.8		40.6		51		26.2		43.9		32.5		34.8
	26.7		28.9		38		30.6		32.2		37		30.1		38.8
	27.9		24.8		44.5		36.9		28.6		37		33.8		30.8
	30.2		22.2		45.2		48.4		29.8		35.7		28.9	Animal 2	33.7
	24.4		23.7		41.9		31.9		31		41.1		30.1		19.9
	24.4		29.9		41.9		35.7		35.7		38.4		25.3		24.8
	29.9		22.7		32.7		29.3		40.7		34.3		30.2		24.8
	29		37.9		35.4		34.4		35.7		26.1		35.6		28.8
	36		27.9		38		31.9		36.9		28.8		35.6		34.7
	29		25.8		32.7		28		29.8		28.8		31.3		29.8
	30.2		24.1		24.9		29.3		38.1		26.1		34.5		30.8
	31.4		25.1		32.7		36.9		36.9		28.8		35.6		20.7
	31.4		24.1		28.8		30.6		44.1		32.9		36.7		23.9
	33.7		28.1		47.3		43.1		40.5		30.2		35.6		19.6
	31.4		26.1		35.2		24.1		34.6		28.8		29.1		20.7
	21.5		25.1		37.6		30.4		36.9		34.3		33.3		22.8
	25.6		31.1		43.7		26.6		36.9		32.9		26.3		22.8
	30.2		24.1		31.6		35.5		29.8		31.5		31.2		28.3
	27.9		29.1		34		36.8		27.4		24.7		25.2		31.5
	30.2		26.1		23.1		39.3		23.8		39.8		34.3		21.8
	24.8		21.1		37.6		35.3		29.8		31.5		33.3		26.1
	31.6		30.1		31.6		39.3		22.9		32.9		28		20.7
	26		29.1		37.6		41.8		20.1		35.7		33.3		27.2
	27.1		26.1		35.2		31.7		21.9		31.5		27.2		25.8
	30.5		28.1		35.2		27.9		23.6		30.2		36.2		26.1
	16.9		28.1		44.9		33		21.9		28.8		36.2		25
	27.1		32.1		29.1		36.8		21		28.8		313		25
	39.6		30.1		40		22.8		21		26.1		32.5		25
	36.1		22.1		32.8		24.1		19.3		35.7		32.6		28.3
	33.9		23.7		29.4		22.8		24.5		32.9		35.4		27.2
	32.7		27.5		27.9		35.5		18.4		27.4		32.3		25
	28.2		27.5		32.8		29.1		15.8		35.7		32.5		25
	26		32.3		36.4		26.6		18.4		28.8		33.7		25
	30.5		25.9		32.8		43.1		23.6		31.5		32.5		26.9
	28.2		25.1		32.8		31.7		18		34.3		28.9		23.8
	28.2		46.9		34		26.6		16.6		25.1		37.4		30
	22.6		21		35.2		25.3		21.9		25.9		37.4		34.1
	25.8		24.3		31.6		39.3		21.9		28.4		33.7		24.8
	26		26.7		31.6		29.1		23.6		19.2		33.7		29
	23.7		34.8		30.3		33		34.7		27.6		33.4		26.9
	29.3		32.3	Animal 3	14.6	Animal 3	13.3		33.7		31.8		36.2		31
	27.1		28.9		19.7		18.9		35.7		24.2		32.5		34.1
	24.8		28.3		17.9		26.5		33.7		31.8	Animal 3	38.3		27.5
	24.8		27.5		17.1		23.7		26		30.1		34		22.5
	27.1		29.9		16.5		30.3		35.7	Animal 3	39.6		38.3		37.5
	24.8		27.5		21		26.5		28.9		33.9		35.1		26.2
	26		25.9		14		16.1		38.5		32.5		33		31.2
	24.8		20.2		20.3		24.6		31.8		33.9		33		30
	22.6		19		31.7		11.4		29.9		36.7		33		33.7
	30.5		19.4		12.5		25.6		22.2		36.7		29.8		31.2
	27.1	Animal 4	21.9		23.5		25.6		27		42.4		31.9		33.7
	30.5		37.2		24.1		23.7		23.1		35.3		31.9		33.7
	28.2		24.8		23.8		37.3	Animal 3	27.1		36.7		30.8		27.4
	23		25.7		22.9		28.4		26.3		36.7		35.1		26.2
	27.1		19.1		15.2		42.6		23.9		33.9		34		33.7
	23.9		32.4		21		34.1		26.3		39.6		35.1		30
	31.8		26.7		24.1		33.1		23.1		32.5		32.1		40
	29.5		29.6		11.4		30.3		12.7		33.2		27.6		32.5
	30.7		25.7		19.1		38.8		27.1		31.1		37.2		32.5
	34.1		21.9		21		23.4		25.5		42.4		42.5		27.5
	29.5		25.7		23.4		22.5		19.1		35.3		30.6	Animal 3	25.3
	27.3		21.7		21.9		25.4		26.3		39.6		31.9		18.6
	25		25.7		21.2		23.4		24.7		42.4		34		11
Animal 4	30.9		22.9		19		25.4		24.3		31.1		33		17.7
	21.1		24.8		19		21.5		27.1		38.2		37.2		18.6
	20.3		29.6		23.4		23.4		16.1		32.5		29.8		20.2
	24.4		24.8		27		27.3		23.1		18.7		33		18.2
	22.8		33.4		28.5		27.4		27.9		19.5		35.1		18.2
	17.9		26.7		27.7		26.4		36.6		27.3		23.4		17.5
	22.8		21.9		21.8		26.4		21.5		24.9		29.8		17.5
	24.4		31.9		16.1		25.4		21.5		25.7		29.8		18.9
	22		29		15.3		27.3		22.3		24.2		35.8		21
	25.2		29		21.2		21.5		36.5		21		26.9		32.2
	22		24.2		27.7		25.2		31.8		21.8		31.8		12.6
	22		22.3		28.5		24.4		34.1		27.6		28.9		19.6
	26.8		23.2		14.6		25.4		27.1		27.3		19.9		16.8
	23.6		24.2		9.5		28.3		35.3		18.3		22.9		9.8
	32.5		23.2		27		24.4		41.2		17.5		30.8		14
	24.4		29		19		24.4		36.5		12.4		29.8		25.1
	25.2		24.2		25.1		24.4		34.1		15.3		26.9		22
	26		29		21.7		23.3		31.8		17.5		25.9		18.1
	25.1		30		19.9		22.1		37.7		16.8		17.9		26.7
	30.1		23.2		18.2		33.2		35.3		24.1		24.9		25.9
	21.2		29		17.3		24.4		30.6		12.4		31.8		14.1
	21.2		19.1		17.3		22.1		25.9		22.3		23.1		25.1
	25.6		19.9		18.2		21		28.2		20.6		20.3		23.2
	25.6		21.5		14.7		24.4		27.1		14		22.2		32.2
	7.8		13.5		26.9		32.1		34.1		21.5		15.7		23.2
	17		29.4		29.5		27.7		31.8		13.2		24		19.1
	31.5		12.5		15.6		27.7		31.8		25.6		19.4		12.1
	17		20.7		28.6		28.6		32.9		19.8		24		17.1
	30.7		23.9		19.1		27.7		29.9		19		18.5		22.2
	23		27		16.5		21		22.9		19		20.3		26.2
	19.6		19.9		16.5		25.5		32.9		20.6		22.2		21.1
	24.7		19.9		20.8		26.6		34.9		25.6		28.6		28.2
	10.2		24.7		19.1		27.7		33.9		19		20.3		29.2
	20.5		31.8		17.3		24.4		35.9		21.5		24.9		37.2
	18.8		21.5		13		21		35.9		20.6		17.5		23.2
	20.3		29.4		19.9		35.4		26.9		17.7		21.2		28.2
	23.9		32.6	Animal 4	29.5		32.1		35.9		25.6		22.2		18.5
	27.3		20.7		28.1	Animal 4	27		32.9		19		22.2		17.7
	17		20.7		19.9		28.9		39.9		19.8	Animal 4	22.6		23.1
	25.6		25.4		17.7		28.9		33.9		17.3		25.8		22.3
	24.7		18.9		30.3		29.9		28.9	Animal 4	19.3		25		16.2
	34.1	Animal 5	22.7		25.9		21.2		32.9		24.1		25		16.9
	26.4		19.2		28.1		29.9		35.9		21.2		21		13.1
	26.4		19.2		16.3		30.9		32.9		21.2		26.6		12.3
	23.3		14.8		14		28		30.9		29.9		18.6		23.1
	24.1		21.5		17.7		30.9	Animal 4	28.2		25		29.1		24.6
	24.9		20.1		23.6		28.9		29.1		31.8		16.2		22.3
	21		15.7		13.3		29.9		24.7		27.9		20.2		13.9
	24.1		14		17		25.1		21.2		27		21.8		21.6
	23.3		14		17		25.1		30.8		31.8		25		16.9
	24.1		13.1		23.6		24.3		30.8		27		28.3	Animal 4	22
	15.9		14.8		16.3		27		29.1		20.3		19.4		25.2
	18.7		27.1		20.7		32.8		33.5		19.3		18.6		25.2
	16.3		22.7		16.1		29.9		29.1		21.2		24.2		22
	22.5		27.1		20.7		28		25.6		29.9		21.8		20.4
	23.3		8.7		25.8		28		24.2		26		25		10.2
	21		22.7		23.2		21.8		37		22.1		21.8		22
	24.9		17		22.3		13.1		27.3		21.2		25.4		30.7
	25.6		17.5		22.3		23.5		25.6		31.1		28.9		18.9
	25.6		17.5		15.1		22.6		30.8		28.7		31.6		33
	25.6		19.2		16		29.6		27.3		31.1		23.7		20.4
Animal 5	26.8		18.3		29.4		30.5		25.6		22.7		25.4		28.3
	30.5		22.7		27.6		23.5		22		34.7		22.8		33
	24		27		24.1		25.2		22.5		25.1		22.8		25.9
	21.2		25.9		19.6		24.4		21.7		29.9		24.6		19.7
	23.1		23.8		25		15.7		21.7		31.1		16.7		29.3
	22.1		27		17.4		21.9		30.1		31.1		21.5		24.4
	24.9		30.2		33		18.3		22.5		32.7		23.7		33
	21.2		30.2		26.7		22.6		24.2		34.7		28.9		29.9
	23.1		34.6		25		19.1		22.5		27.5		26.3		27.1
	19.4		37		21.4		22.6		22.4		26.3		33.3		26.4
	23.8		34.6		16.9		22.6		25.1		25.1		24.6		24
	25.8		24.8		13.4		26.1		27.6		23.9		38.6		19.4
	20.3		13		19.4		22.6		29.2		35.6		22		23.3
	20.3		20.5		22.8		25.2		24.2		27.5		21.9		13.2
	24.9		28.1		22.8		27		26.7		27.5		20.2		14.7
	31.4		28.1		22.8		23.8		23.4		29.9		17.5		28.7
	27.7		36.4		22.8		17.7		19.2		25.1		17.5		31
	29.5		16		27.2		23.8		23.4		23.9		11.1		32.6
	26.8		26.4		25.4		17		17.5		23.9		25.4		27.9
	25.8		28.3		23.7		17.7		23.4		28.7		27.8		22.6
	24.9		34.9		21.1		19.1		19.2		31.1		23.8		25.2
	24		34		23.7		15		25.7		22.7		26.2		24.4
	24.8		26.4		24.6		21.8		21.9		27.5		29.4		27
	28.6		30.2		25.4		26.7		20.4		27.5		25.4		27
	28.7		26		21.1		23.8		17.4		31.1		17.9		26.1
	31.4		19.8		25		22.5		25.7		31.1		19.8		27.9
	21.2		25.5		22.8		19.1		33.3		19.9		22.2		23.5
	19.7		18.9		24.6		23.8		13.6		24.1		23		31.3
	16.6		29.3		24.6		19.7		25.7		22.4		28.6		32.2
	24.9		25.5		14		23.8		19.7		23.3		27.8		29.6
	24		16		24.6		18.7		14.4		24.1		27.8		29.6
	27.7		24.5		22.8		27.9		18.9		27.4		25.4		28.7
	21.2		28.3		28.1		18.4		19.8		23.3		23.8		25.2
	20		21.7	Animal 5	26.8		19.7		18.2		25.8		30.9		27.9
	21.9		22.7		31.3	Animal 5	30.1		18.2	Animal 5	33.2		22.2		31.3
	22.8		19.8		19.7		21.9		34		32.3		30.9		26.8
	28.5				24.2		25.5		28.7		26.4	Animal 5	29.7		23
	24.7				25.9		21		27.2		26.4		31.8		28.3
	21.9				23.3		29.2		21.9		25.4		31.8		29.9
	26.6				21.5		26.4		26.5		29.3		38.9		24.5
	30.4				18.8		16.4	Animal 5	12.3		37.4		31.8		28.3
	28.5				21.5		30.1		17.4		36.2		35.9		29.1
	29.5				30.9		23.7		19.6		25.4		36.9		23
	28				21.5		19.2		23.2		27.4		28.7		22.2
	30.4				22.4		25.5		26.8		23.5		36.9		21.5
	37.1				29.5		22.6		12.3		28.3		30.7		17.6
	29.5				23.3		21		23.9		35.2		27.7		26
	26.6				26.8		21		15.2		35.2		32.8		28.3
	28.5				25		30.1		10.9		30.5		41		26
	24.7				12.5		21.8		16		27.4		34.4		28.3
	27.7				27.7		17		21.8		28.3		32.8		27.6
	24.7				18.8		14.4		24.7		25.4		31.8	Animal 5	31.4
	24.7				19.9		18.3		27.2		24.4		26.6		28.3
	20.9				25.9		18.8		33		33.2		29.7		24.3
	28.5				18.8		21.8		35.4		29.3		31.8		30.4
	22.8				19.7		17.1		31.3		30.3		27.7		37.3
	33.3				28.6		20.9		28		28.3		36.9		26.3
	14.3				27.7		21.8		29.7		21.3		30.7		25.3
	29.5				33.1		17.1		28.8		22.5		29.7		24.3
	23.8				24.2		19.9		31.3		31.3		29.7		27.3
	32.3				25		36		29.7		31.3		32.8		26.3
	33.3				25		27.5		16.6		31.3		29.7		31.4
	31.4				30		30.4		23.9		29.3		30.7		26.8
					27.3		30.4		28.8		31.3		31.5		28.3
					35.4		29.4		28.8		36.7		20		15.2
					22.7		23.7		23.9		30.1		30.5		26.3
					27.3		24.2		25.5		24.9		30.5		25.3
					28.2		22.8		28.8		34.1		26.7		30.4
					26.4		26.6		30.5		34.1		14.3		31.4
					28.2		30.4		26.4		38		21		37.3
					30		27.5		24.7		31.4		31.5		26.3
					23.6		28.5		32.1		27.5		33.4		31.7
					27.3		33.2		23.9		30.1		26.7		37.3
					23.6		30.4		21.4		32.7		28.8		33.1
					26.4		35.1		19.8		39.3		19.1		35.9
					24.5		28		21.4		32.7		25.8		35.9
					29		22.4		33.8		34.1		24.8		41.4
					26		31.7		23.9		38		30.5		33.1
					27		28.9		23.1		38		30.5		38.6
					18		24.2		23.9		34.1		21.9		38.6
					21		22.4		23.9		34.1		31.5		44.2
					31		28.9		25.5		34.7		34.3		34.5
					27		29.8		38.3		30.1		31.5		23.5
					26		26.1		37.4		32.7		33.4		42.8
					31		28.9		35.4		31.4		26.7		31.7
					22		29.8		28.7		27.5		33.4		30.4
					18		23.8		35.4		32.7		35.3		41.4
					20		19.6		25.9		27.5		30		34.5
					19		28.9		37.4		22.3		29.6		35.9
					25		25.2		36.4		19.6		39.1		32.2
					27		32.6		33.5		27.5		29.6		18.6
					26		27		34.5		35.4		24.8		25.4
				Animal 6	25.6		19.6		29.7		34.1	Animal 6	30.3		26.2
					26.3		27		27.3	Animal 6	28.8		23.8		26.2
					27		27		33.5		29.4		24.6		24.5
					26.3		28.9		34.5		30.7		27.5		13.5
					26.1	Animal 6	30.3		34.5		28.1		34.7		13.5
					24.3		30.3		28.7		29.4		29.6		22.7
					20.8		24.4		39.3		30.1		28.9		10.2
					24.9		26.2		34.5		31.6		24.6		22
					27.5		26.5		27.8		34.5		29.6		25.4
					29.8		35.7	Animal 6	34.2		35.8		30.3		24.5
					22.9		31.5		31.1		30.1		28.9		22.8
					27		27.9		26.3		23.7		31.5		25.4
					27.7		25		23.2		28.8		22.7		36.4
					26.3		27.2		24.4		32.2		22.7		33
					26.8		29.9		23.8		33.9		22.1		29.6
					25.6		29.6		22.9		33.9		23.3		23.7
					23.6		31.5		27.5		28.8		21.4		30.5
					32.6		27.6		26.9		23.7		26.5		36.4
					22.2		26		23.2		24.3		22.1		24.5
					30.3		26.9		32.4		28.1		23.3	Animal 6	34.4
					25.6		23.7		32.4		24.9		25.8		25.4
					29.1		27.6		24.8		32.6		27.3		32.7
					31.8		31.5		25.4		28.9		27.9		33.8
					25.7		26.3		27.9		30.1		34.8		28.7
					24.3		30.2		26		33.9		30.4		25.6
					32.4		26.3		24.8		31.3		32.9		32.1
					34.5		26.6		28.6		28.1		29.2		32.7
					27.4		28.9		24.1		26.2		24.2		31.6
					24.3		26.3		24.1		30.7		23.2		36.1
					27		26.9		30.7		28.1		26.1		27.9
					29.7		26.3		30.7		35		31.6		24.2
					29.4		25		26.5		30.1		23		29.3
					28.8		30.9		27		26.5		19.9		32.1
					25.6		28.9		18.1		25.3		23.4		27.7
					30.7		27.6		23		28.3		25.4		28.7
					28.6		27.1		21.6		27.7		32.3		25.4
					29.4		25.6		29.3		32.5		27.3		26.5
					24.3		28.9		30.7		26.8		24.8		26.5
					26.2		33.5		30		27.7		35.4		24.2
					25.6		26.9		30.7		29.5		36.6		29
					28		32.2		24		30.7		35.4		24.6
					28		31.5		27.3		28.3		27.6		24
					33.3		23.9		28		30.7		33.3		29
					31.8		26.3		24		30.1		36.5		23.7
					31.3		28.9		24		35.1		25.6		34.1
					34		25.6		23.3		33.7		26.3		35.2
					34		26.3		26.7		30.1		32.1		31.3
					27.3		21.7		26		33.1		22.4		30.2
					28.7		33.5		22.7		27.1		27.6		26.5
					30.4		29.2		30.7		34.3		30.6		36.9
					31.9		28.3		35.5		26.5		25		29.6
					24.6		26.9		25.5		24.1		28.3		31.8
					38.4		21.7		26.1		29.5		34.5		26.8
					29.7		25.6		28.2		31.5		26.5		27.7
					38		25.6		35.5		35		29.6		30.2
					25.4		28.3		31.9		30.1		34.5		20.7
					35.5		24.9		27.5		29.5		28.3		27.4
				Animal 7	13.1		27.3		29.5		33.1		27.7		25.1
					20.1		32.8		24.1		29.5		31.2		32.6
					19		27.9		28.2		31.3		30.2		37.6
					15.7		26.7		28.8		29.5		25.9		29.2
					19.4		24.9		29.5	EMG34	25.8	Animal 7	16.7		24.7
					15.7		26.7		28.2		18.2		21		29.2
					24		20.6		27		25.8		22.8		25.4
					20.1		24.3		30.2		20.5		22.2		25.2
					18.5	Animal 7	27.1		23.5		15.9		23.4		32.6
					17.6		20.7		23.5		28.9		23.4		21.3
					17.1		20.7		23.5		28.5		33.3		22.7
					17.1		19.9		28.8		41		32.5		23.5
					14.6		23.6		23.5		23.5		24.1		29.7
					15.3		22.3		23.5		41.5		27.4		31.2
					16.2		27.9		22.1		24.3		19.3		20.3
					18.5		27.9	Animal 7	23.9		23.4		24.9		26.2
					16.4		26.3		25.6		27.3		19.9		27.9
					18.5		21.3		24.7		26.6		9.9		26.7
					19.4		24.7		34.6		36.1		21.1		28.7
					16.6		35.5		26.4		32.6		21.8		24.2
					19		35.8		23.9		23.5		31.1	Animal 7	15.6
					20.8		19.9		30.5		19		28.6		18.4
					23.6		42.2		23.5		27.3		13.9		28.8
					27.5		22.3		25.6		25.8		23.9		20.2
					21.2		25.5		25.6		33.4		23.2		17
					21.2		20.4		21.4		31.5		21.3		16.1
					29.8		18.5		33		30.4		18.1		20.7
					23.6		15.4		26.4		29.6		23.2		20.2
					18.8		16		35.5		22.8		23.9		19.6
					20.1		16.7		33		30.4		26.5		19
					28.3		17.3		30.5		23.3		23.2		23.6
					23.6		10.2		21.7		26.3		12.6		19.2
					18.1		16.7		33		17.7		23.9		31.5
					21.7		41.9		24.7		22.6		21		37.4
					33		13		23.1		19.5		24		28.2
					17.3		16		27.2		26.9		22.8		25.3
					18.1		12.3		25.6		25.7		25.3		17.6
					22.8		13.3		35.5		22.6		21		27.6
					17.3		15.4		26.8		19		21.6		36.3
					22.8		22.8		25.6		19.9		31.3		28.2
					21.2		19.1		27.4		16.5		17.9		19
					25.1		16		30.5		22.6		31.4		26.8
					20.5		17.9		32.2		21.4		21.3		16.1
					31.4		12.6		17.9		15.9		17.3		13.8
					22.4		24.7		21		17.8		16.6		21.9
					30.8		16.7		17.9		27.7		31.8		31.5
					17.3		17.3		22.2		22.7		28.4		18.1
					25.6		19.1		21		17.1		22.2		18.7
					31.4		20.2		19.1		22		22.2		17.1
					23.3		16.1		16.7		20.6		22.2		19.2
					21.8		16.1		21		15.6		23.4		19.2
					22.4		15.9		22.2		15.6		21.6		29.9
					41		23.3		23.7		15.6		21		23.9
					25.6		16.1		13.6		22.4		24.4		25.5
					26.9		15		20.4		24.2		20.3		33.8
					20.2		15		21.6		24.9		20.8		27
					37.2		15.3		16		14.9		26		19.4
					26.9		17.6		19.7				20.3		13.5
					30.1		17.6		18.5				25.5		18.3
							19.2		17.3				20.3		26.5
							16.1		20.5						22.4
							18.1		23.6						27.7
							17.9		23.6						23
							18.7		16.1						31.8
							18.7		17.4						23.2
							16.6		19.2						23
							16.6		13						21.2
							19.2		21.3						16.5
									13						29.4
									18.6						23
									16.7						22.6
									11.8						21.2
									20.5						33.6
									18.6						23
									19.2						33
									14.9						23.6
									21.8						26.5
									14.9						18.8

## Sheet: Flat-inclined Te 
15cm/s				25cm/s				40cm/s				50cm/s					Same data recapitulated for making the graph	15cm/s		25cm/s		40cm/s		50cm/s
Individual Te times for each animal (ms)
Flat		Inclined		Flat		Inclined		Flat		Inclined		Flat		Inclined				Flat 15cm/s	Inclined 15cm/s	Flat 25cm/s	Inclined 25cm/s	Flat 40cm/s	Inclined 40cm/s	Flat 50cm/s	Inclined 50cm/s
Animal 1	65.32	Animal 1	81.5735	Animal 1	81.368	Animal 1	78.1849	Animal 1	74.3929	Animal 1	81.8771	Animal 1	77.5941	Animal 1	71.7348		Animal 1	65.32	81.5735	81.368	78.1849	74.3929	81.8771	77.5941	71.7348
Animal 2	60.9848	Animal 2	65.9213	Animal 2	72.5887	Animal 2	82.424	Animal 2	68.1729	Animal 2	69.6763	Animal 2	74.4241	Animal 2	70.7211		Animal 2	60.9848	65.9213	72.5887	82.424	68.1729	69.6763	74.4241	70.7211
Animal 3		Animal 3		Animal 3	74.4068	Animal 3	69.6467	Animal 3	72.5268	Animal 3	70.4966	Animal 3	67.3475	Animal 3	67.0698		Animal 3			74.4068	69.6467	72.5268	70.4966	67.3475	67.0698
Animal 4	70.3787	Animal 4	78.1556	Animal 4	74.9983	Animal 4	72.8448	Animal 4	74.4661	Animal 4	77.0636	Animal 4	69.9424	Animal 4	74.1758		Animal 4	70.3787	78.1556	74.9983	72.8448	74.4661	77.0636	69.9424	74.1758
Animal 5	64.8032	Animal 5	75.9625	Animal 5	70.4407	Animal 5	69.7677	Animal 5	66.4115	Animal 5	67.2237	Animal 5	71.2286	Animal 5	66.0267		Animal 5	64.8032	75.9625	70.4407	69.7677	66.4115	67.2237	71.2286	66.0267
Animal 6		Animal 6		Animal 6	63.8474	Animal 6	64.6508	Animal 6	60.3127	Animal 6	65.6483	Animal 6	62.3902	Animal 6	68.4983		Animal 6			63.8474	64.6508	60.3127	65.6483	62.3902	68.4983
Animal 7		Animal 7		Animal 7	72.0322	Animal 7	69.315	Animal 7	68.0286	Animal 7	77.9736	Animal 7	70.8107	Animal 7	72.969		Animal 7			72.0322	69.315	68.0286	77.9736	70.8107	72.969
Mean	65.3717	Mean	75.4032	Mean	72.8117	Mean	72.4049	Mean	69.1873	Mean	72.8513	Mean	70.5339	Mean	70.1708		Mean	65.3717	75.4032	72.8117	72.4049	69.1873	72.8513	70.5339	70.1708
St Dev	3.85747	St Dev	6.7297	St Dev	5.27848	St Dev	6.03076		5.08184	St Dev	6.11861		4.87106	St Dev	3.06067		St Dev	3.85747	6.7297	5.27848	6.03076	5.08184	6.11861	4.87106	3.06067
Individual Te times for each animal
Animal 1	77.7	Animal 1	76.6	Animal 1	89.8	Animal 1	94	Animal 1	79.8	Animal 1	75.3	Animal 1	77	Animal 1	54.9
	67.1		75.2		78.5		85		76.4		88.5		75		58.7
	58.8		105.4		91		78.2		60.4		95.5		71.8		60.5
	58.8		115		94.4		102		68.4		70.1		76.4		77.3
	67.1		84		76.9		92.9		80.9		75.3		78.3		68
	60		88.4		70.5		80.4		74.1		99		81.1		61.5
	62.4		81.8		101.2		88.4		72.9		76.2		87.6		52.2
	69.4		101.7		79.6		75.9		86.6		87.6		84.8		55.9
	121.2		78.9		86.4		73.6		90		73.6		85.7		54.9
	49.4		121.1		91		75.9		70.7		78.8		77.4		67.1
	54.1		68.5		70.5		102		62.7		88.5		86.7		67.1
	67.1		70.8		72.8		100.8		63.8		80.6		77.4		63.3
	48.2		70.8		70.5		92.9		116.3		63.9		85		71.7
	54.1		72.02		79.6		88.4		60.4		57.8		83.9		53.1
	62.4		70		72.8		88.4		65		68.3		84.8		52.2
	67.1		70.8		61.4		80.4		77.5		80.6		73.6		61.5
	55.3		78.9		85.3		102		74.1		92.9		84.8		56.8
	67.1		63.4		81.9		74.8		72.9		74.5		81.6		51.2
	60		48.6		76.2		71.4		72.9		83.2		65.5		46.6
	45.9		70.8		70.5		94		87.8		75.7		62		60.5
	86.9		79.6		87.5		100.8		75.2		84.3		81.6		68
	64		113.3		80.7		63.4		70.7		86.2		74.7		78.2
	65.9		123.4		84.1		99.7		59.3		96.7		80.4		71.7
	52.5		75.8		76.2		108.7		99.2		98.7		68.9		70.8
	64		105.1		79.6		94		52.4		87.2		82.7		70.8
	63		112.4		79.6		79.3		53.6		80.5		85		56.8
	59.2		75.8		75.9		80.4		70.7		89.1		77		66.4
	60.1		71.3		72.8		87.2		70.6		75.7		74.7		73.8
	60.1		90.5		85.2		70.5		68.6		77.6		67.8		62.5
	72.5		66.6		75.9		70.5		64.7		70.9		89.6		47.8
	60.1		71.3		76.9		52.2		90.2		80.5		73.5		69.3
	76.4		56.7		83.2		84.4		74.5		68		82.7		67.4
	60.1		104.9		75.9		73.1		59.8		78.5		82		90.8
	64.9		70.4		98.7		73.1		78.4		86.2		74.6		81
	58.2		69.4		85.2		73.1		85.3		89.1		62.8		97.6
	65.9		62.1		76.9		72.2		71.6		78.5		84.1		70.3
	59.2		86.8		68.6		66.1		59.8		98.7		87.6		75.2
	56.3		87.9		95.6		61.8		74.5		92.5		87.6		79.1
	53.5		56.7		82.1		50.5		59.8		72.8		84.1		66.4
	66.8		62.1		74.8		80.9		73.5		94.4		78.2		67.6
	92.6		74		71.7		58.3		68.6		98.4		75		69.6
	68.8		65.8		82.1		69.6		76.5		79.7		64		66.7
	71.4		55.7		80		67.9		85.3		76.7		87.6		63.7
	61		64.9		90.4		67		87.2		71.8		66		67.6
	79.2		87.7		94.6		65.2		89.2		77.7		78.2		69.6
	62.3		77.7		91.5		65.2		72.5		79.7		79.4		85.3
	63.6		77.1		81.1		76.6		88.2		82.6		71.1		80.4
	85.7		140		71.7		83.5		71.6		91.5		86.5		81.4
	77.9		86.6		98.7		59.2		80.4	Animal 2	68.5		72.2		80.4
	45.4		91.4		90.4		59.2		69.6		83.7		64		78.4
	59.7		78.3	Animal 2	58.9		58.3		64.7		90.5		53.3		83.1
	68.8		87.8		61.6		59.2		76.5		107	Animal 2	77.1		85.7
	61	Animal 2	54.8		82.5		71.3		75.5		89.1		77.1		97.8
	66.2		56.7		66.8	Animal 2	85.4		94.1		76.8		85.5		87.1
	83.1		56.7		66.8		59.9		67.6		68.6		78.3		89.7
	79.2		60.9		72		77.7		72.5		63.1		74.7		87.1
	48		56.7		79.9		89.2	Animal 2	78.6		74.1		65		105.8
	66.2		68.1		106.1		91.7		76.3		69.9		74.7		92.4
	66.2		53.6		68.1		91.7		71.5		76.8		80.7		85.7
	70.1		54.7		77.3		100.6		63.1		68.6		77.1		91.1
Animal 2	60.4		64		66.8		94.3		58.4		74.1		54.2		71
	61.6		68.1		61.6		91.7		72.7		61.7		85.5		50.9
	48.8		65		79.9		93		81		62.1		78.3		69.7
	59.3		65		83.8		82.8		67.9		65.8		72.3		79
	53.5		76.3		69.4		85.4		70.3		75.4		77.1		96.4
	56.2		75.3		68.1		85.4		69.1		61.7		73.5		92.4
	53.5		60.9		99.5		76.4		66.7		67.2		59	Animal 2	66.5
	61.6		60.9		81.2		70.1		65.5		68.6		68.6		91.3
	65.1		62.9		61.6		82.8		77.4		71.3		66.2		84.4
	46.5		55.7		58.9		107		91.7		61.7		82		83.4
	50		56.7		65.5		96.8		65.5		69.9		84.2		90.3
	56.9		69.1		68.1		95.6		77.4		72.7		81		83.4
	61.6		57.8		57.6		85.4		78.6		60.3		78.8		75.4
	52.3		78.3		62.9		72.6		67.9		71.3		74.5		71.5
	50		59.2		81.2		81.5		67.9		72.7		77.7		64.2
	63.9		75.3		79.9		71.3		69.1		64.5		72.3		57.7
	66.2		59.2		66.7		62.1		69.1		69.9		86.4		62
	52.3		68.3		78.9		112.8		70.3		67.2		65.9		71.8
	56.9		93.4		85		72.2		78.6		67.2		69.6		70.7
	55.8		81.3		71.6		68.4		66.7		63.1		66.5		55.5
	51.1		65.3		61.9		87.4		69.1		68.6		70.6		74
	52.3		64.2		71.6		87.4		71.5		64.5		80.6		74
	47.6		70.3		81.3		71		70.3		54.9		80		64.4
	55.3		96.4		63.1		65.9		62		61.7		83.7		57.7
	72.2		68.3		69.2		62.1		61.3		76.8		77.6		67.4
	66.6		80.3		74		79.8		50.8		63.1		81.7		63.1
	65.5		83.3		64.3		68.4		52.5		54.9		68.5		58.7
	81.3		66.3		94.7		98.9		49		64.5		69.9		57.7
	66.6		63.2		58.3		82.4		54.3		59		83.1		59.8
	58.7		67.3		88.6		84.9		56.9		56.2		86.8		74
	58.7		54.2		83.7		59.6		62.2		65.8		92.8		63.1
	72.2		73.3		86.2		91.2		65.7		72.7		74.7		62
	57.6		58.2		60.7		93.8		59.5		69.9		78.3		60.9
	56.4		67.9		72.8		79.8		63		67.2		65.1		70.7
	60.9		80.8		61.9		83.6		59.5		65.8		74.7		65.3
	54.2		62.2		69.2		76		62.2		82.3		61.5		50
	63.2		74.4		65.5		90		59.5		80.9		67.5		68.3
	58.7		64.7		55.8		65.9		51.7		75.4		66.3		83.8
	57.6		68.7		93.4		72.2		49.9		69.4		72.3		67.2
	68.8		67.1		58.3		92.5		60.4		61.8		71.1		65.2
	70		60.6		88.6		92.5		67.4		70.2		62.7		80.7
	51.9		58.2		54.6		78.6		53.4		76		63.9		93.1
	65.5		51.7		81.3		73.5		92.5		68.5		75.9		80.7
	70		51.7	Animal 3	81.3	Animal 3	76.7		83.8		61.8		77.1		72.4
	54.2		63.1		55.2		74.8		73.2		87.7		68.7		86.9
	62.1		54.2		54.6		60.6		79		70.2	Animal 3	79.8		75
	58.7		61.4		76.8		74.8		75.2		56		77.7		78.7
	57.6		68.7		76.2		70.1		79	Animal 3	72.1		92.5		61.2
	97.1		59.8		71.1		64.4		67.5		64		77.7		65
	77.9		69.5		79.4		68.2		70.4		94.7		69.1		68.7
	64.3		79.2		74.3		68.2		74.2		72.1		59.6		76.2
	64.3		67.1		85.1		74.8		61.7		89		64.9		73.7
	57.6		64.7		77.5		89		58.8		76.3		72.3		72.5
	62.1	Animal 4	67.7		72.4		66.3		64.6		76.3		83		62.5
	67.7		73.4		89.9		71		108.9		70.7		76.6		76.2
	56.4		76.3		67.3		77.7	Animal 3	68.5		73.5		68.1		80
	71.1		92.5		57.2		78.6		64.5		69.2		56.4		76.2
	49.8		68.6		80		85.2		58.9		91.9		81.9		67.5
	52.3		69.6		91.4		75.8		65.3		73.5		79.8		78.7
	61.3		66.7		59.7		96.6		76.5		73.5		74.5		66.2
	67		96.3		72.4		70.1		69.3		65		77.7		66.2
	48.8		68.6		74.9		63.5		75.7		63.6		70.2		71.2
	65.9		62.9		89.5		65.4		64.5		73.5		60.6		66.2
	70.4		67.7		98.5		59.6		68.5		87.6		72.3	Animal 3	79.3
	77.2		70.5		64.2		69.3		66.1		70.7		80.8		59.9
	65.9		68.6		78.8		71.3		65.3		55.1		69.1		83.5
Animal 4	82.9		43.9		52.6		82		69.3		73.5		80.8		59.9
	72.4		68.6		65		67.4		70.9		72.1		65.9		54
	59.5		57.2		75.2		56.6		78.8		80.5		64.9		49.8
	56.1		54.3		70.1		61.5		72.5		65.5		69.1		59.6
	63.5		40		96.4		58.6		94.8		86.5		64.9		56.8
	60.2		51.5		97.1		50.8		66.9		85.8		79.8		55.4
	49.6		50.5		47.4		64.5		83.6		123.2		58.7		66.6
	91.9		153.8		57.7		65.4		77.2		58.5		67.7		91.8
	61		68.7		87.6		51.8		58.1		78.7		63.7		88.3
	63.5		61.9		83.9		70.3		78.9		75.6		68.7		63.1
	59.4		87.1		85.4		72.3		69.4		86.5		63.7		73.6
	52.9		101.6		75.9		63.5		78.9		98.2		58.7		89
	75.7		84.2		72.3		60.6		80		80.3		58.7		54.7
	35.8		62.9		70.1		49.8		75.3		57.7		61.7		58.2
	44.7		188.7		92		61.5		74.1		61.4		61.7		66.6
	74		92.9		66.4		87.5		81.2		72.3		70.6		51.8
	65.9		62.4		72.8		54.3		74.1		67.2		54.7		69.9
	54.5		94.8		53.7		54.3		77.7		79.6		61.7		84.8
	55.3		104.5		64.2		66.4		58.8		81.8		79.6		87.2
	54.5		150		75.4		108.5		62.4		67.9		75.6		77
	54.5		90		81.5		100.8		74.1		42.4		75.6		78.6
	82.2		53.3		59		60.9		78.9		71		64.7		87.2
	75.9		82.7		78		50.9		76.5		45.4		64.7		64.4
	74.2		93		77.2		72		85.9		57.8		63.7		59.4
	74.2		67.6		77.2		91.9		76.5		66		61		50.3
	71.6		94.6		68.5		94.1		71.8		69.3		57.3		54.4
	55.4		88.3		112		60.9		73		54.5		61.9		57.4
	60.5		71.6		105.8		62		68.8		52.8		51.7		102.7
	66.5		90.7		65		57.6		74.2		56.1		65.6		88.6
	65.6		74		55.5		63.1		75.8		64.4		72		76.5
	110		62		61.6		59.8		76.8		68.5		67.4		53.4
	75.9		59.6		60.7		89.7		73.8		61.9		50.8		65.5
	86.9		118.5		75.4		70.9		78.8		77.6		50.8		62.4
	59.7		74		76.3		55.4		68.8		75.9		52.6		53.4
	75		97		76.3		66.4		73.8		52.8		59.1		60.4
	70.7		81.1		71.1		76.4		71.8		66.7		56.3		46.3
	55.4		67.6	Animal 4	83.5		66.4		73.8		52.8		62.8		69.3
	81.8		57.3		72.4	Animal 4	94.5		70.8		52.8		60		77
	77.6		62.8		69.4		87.7		68.8		46.2	Animal 4	63		68.5
	68.2		54.1		73.1		76.2		73.8		59.3		80.8		73.9
	71.6		51.7		67.2		59.8		79.8	Animal 4	84.7		87.2		63.9
	69.9	Animal 5	60.2		75.3		77.1		69.8		76.1		85.6		53.9
	71.5		53.2		65.7		72.3		63.8		113.6		79.9		57.7
	64.5		62		88.6		134		67.8		93.4		87.2		58.5
	59.8		66.3		77.6		61.7		67.8		71.3		89.6		68.5
	55.2		61.1		95.3		64.6	Animal 4	66.1		112.7		79.1		73.1
	65.3		70.7		77.6		57.9		81.1		88.6		71.1		70.1
	84.7		59.3		63.5		74.2		77.6		84.7		60.6		63.9
	88.6		67.2		64.3		62.7		80.2		78		61.4		57.7
	69.9		65.4		107.1		77.1		64.3		89.6		58.1		57
	64.5		69.8		83.5		105.1		80.2		82.8		58.9	Animal 4	66.8
	75.4		63.7		83.5		80		82		58.7		58.9		85.7
	89.4		71.6		73.1		62.7		75.8		79		61.4		71.6
	128.2		70.7		63.5		73.3		83.7		105.9		46.8		76.3
	80		146.6		70.9		54		91.7		80.9		58.1		75.5
	79.3		45.4		90.9		78.1		78.4		75.1		57.3		80.2
	55.2		43.6		63.3		81.8		73.2		59.7		50.9		70.8
	69.9		62.8		100.7		56.6		96.1		79		62.3		79.4
	128.2		69.8		74		62.7		74.9		75.3		58.8		77.1
	77.7		67.2		90.9		47.9		72.3		72.9		71		77.8
	69.2		57.6		67.7		60.9		82.9		61		67.5		84.9
Animal 5	55.4		63.7		113.2		74		74		65.8		67.5		79.4
	80.3		56.7		86.4		91.4		61.7		66.9		85.1		78.6
	49.8		100.5		74		75.7		71		88.5		80.7		77.1
	53.5		109.1		82.9		98.3		85.2		86.1		78		88.1
	59.1		68.1		82.9		80.1		76.8		78.9		85.1		98.3
	66.4		73.5		80.2		58.3		65.1		74.1		84.2		86.5
	60		153.4		82.9		65.3		78.5		75.3		88.6		76.3
	132		81		75.7		63.5		79.3		64.6		85.1		62.1
	39.7		83.2		97.1		56.6		79.3		75.3		85.1		72.1
	46.1		59.4		67.7		55.7		78.5		74.1		77.2		62.8
	46.1		121		59.7		62.7		81		95.6		75.4		71.3
	55.4		76.7		97.1		71.4		68.5		90.9		78.9		101.5
	60		83.2		83.4		71.4		81.8		71.7		77.2		69.8
	58.1		73.5		71.1		62.7		76		82.5		78.1		76.7
	75.7		67		63.2		72.2		70.1		59.8		42.1		83.7
	58.1		137.2		69.3		87.8		64.3		61		80.9		80.6
	48		70.8		64.1		128.6		86		87.3		74.6		83.7
	58.1		68.4		61.4		70.1		65.1		84.9		76.2		79.8
	52.6		56.6		69.3		68		75.2		90.9		66.6		84.4
	72.9		114.4		67.6		59.9		63.5		66.9		71.4		81.8
	49.8		130.2		56.2		61.9		66		70.5		70.6		84.4
	48.9		82.1		57		93.9		74.1		65.8		54.7		75.7
	50.8		66.1		68.4		112.3		70.3		75.3		65.1		65.3
	53.5		62.3		63.2		83		84.7		82.5		63.5		73.1
	59.1		140.6		75.5		66		71.8		59.8		63.5		74
	132		56.6		76.3		61.8		76.4		53.8		76.2		62.7
	50.8		53.8		73.7		68.7		62		77.3		60.3		53.1
	53.5		84.9		86		66		84		69		61.1		76.6
	61.8		58.5		51.8		49.7		71.1		74.8		69.8		71.4
	58.1		57.6		66.7		16.3		72.6		56.5		61.1		73.1
	55.4		70.8		53.5		102.7		79.4		68.1		54		67.9
	70.1		57.6		72.8		89.8		80.9		80.6		65.1		61.8
	101.5		93.4		57		61.2		60.5		69.8		69		83.6
	69.4		73.6	Animal 5	100.2		55.1		74.1		70.6		68.2		73.1
	128.3		46.2		74.2	Animal 5	76.6		77.9	Animal 5	56.7		72.2		72.3
	66.5		68		79.6		85.7		59.7		55.7		58.7		52.1
	58				66.2		85.7		56.7		53.8	Animal 5	72.7		55.9
	67.5				85		88.5		57.5		83.1		74.8		62.8
	62.7				77.8		63.8		75.6		65.5		72.7		73.6
	49.4				60.8		66.6		73.4		63.5		69.7		71.3
	54.2				83.2		74.8	Animal 5	63.1		71.4		91.2		78.1
	53.2				89.4		71.1		57.3		66.5		76.8		73.6
	52.3				75.1		86.6		60.9		60.6		75.8		76.6
	62.7				69.8		80.3		55.8		77.2		69.7		51.3
	58.9				59		70.2		62.4		67.5		84		53.6
	62.7				81.4		58.4		70.3		68.4		79.9		75.8
	64.6				64.4		67.5		52.9		69.4		76.8		82.7
	57				58.1		69.3		57.3		66.5		72.7		69.7
	50.4				61.7		81.2		75.4		62.6		69.7		66.7
	60.8				80.5		56.7		62.4		54.7		67.9		67.4
	75.1				82.3		68.1		65.3		58.7		67.6		78.9
	124.5				69.8		83.3		61.8		63.5		63.5	Animal 5	74.9
	58				88.6		90.3		70.9		76.3		69.7		57.7
	73.2				62.6		80.7		61		74.3		66.6		61.7
	79.8				69.8		66.4		62.6		72.3		63.5		62.7
	78.9				63.5		73		65.1		64.5		69.7		67.8
	64.6				73.3		70.2		73.3		49.9		73.8		73.9
	59.9				88.6		64.5		66.8		73.3		74.8		69.8
	58.9				74.2		74		71.7		73.3		56.3		60.7
	62.7				96.6		80.6		68.4		72.3		69.7		63.8
	81.7				79.6		67.4		75		76.3		78.9		59.7
	52.3				79.6		79.7		70		82.1		68.6		76.9
	61.8				82.7		63.6		80.8		89		65.6		56.7
					72.7		65.5		54.4		68.4		60.1		64.8
					75.4		72.1		75.8		73.3		63.9		69.8
					76.3		68.3		61.8		66.8		83		70.8
					92.7		56.9		70.9		69.4		77.3		65.8
					81.8		66.4		67.6		61.6		67.7		63.8
					74.5		61.7		75.7		70.7		99.2		63.8
					66.3		56		68.4		58.9		56.3		61.7
					57.2		56.9		60.2		82.5		74.4		73.9
					63.6		53.1		51.9		74.7		67.7		66.3
					41.8		56		59.3		64.2		62		56.6
					50		61.7		68.1		65.5		66.8		62.1
					55.4		88.2		61.8		57.6		66.8		80.1
					76.3		76.4		53.6		70.7		63		78.7
					70.9		75.5		58.5		72		76.3		69
					60.9		76.4		64.3		53.7		75.4		70.4
					56.9		70.8		62.6		69.4		71.5		64.9
					52.9		87.6		45.3		66.8		77.3		69
					47.9		73.6		54.4		69.4		69.6		73.2
					58.9		68		68.4		70.7		61		73.2
					68.9		69		60.4		58.9		63.9		51.5
					66.9		74.5		69		66.8		66.8		70.4
					68.9		56.8		74.7		68.1		77.3		73.2
					69.9		68		77.6		61.6		72.5		80.1
					45.9		71.7		68		69.4		70.6		69
					48.9		78.3		72.8		58.9		78.2		71.8
					59.9		58.7		69		72		62		75.9
					61.9		54		80.5		58.9		71.5		65.1
					71.9		55		74.7		73.3		71.5		65.1
					82.9		59.6		64.2		66.8		72.5		54.1
				Animal 6	59.6		67.1		59.4		56.3	Animal 6	55.6		66
					57.5		56.8		81.4	Animal 6	65.9		54.9		71.1
					55.4		59.6		72.8		67.8		51.3		64.3
					63.7		60.6		70.9		74.8		57.1		70.2
					58.9	Animal 6	67.8		85.3		71.6		62.9		71.1
					54		60		63.2		62		54.2		60.1
					70.7		72.5		75.7		67.8		55.6		80.4
					60.3		70.1		57.5		72.9		69.4		66
					59.6		73.1		80.5		82.5		63.6		56.7
					59.6		72.5	Animal 6	60.5		71.6		60.7		59.2
					59.6		75.5		61.1		77.4		60.7		59.2
					56.8		54.7		73.3		65.9		58		54.1
					60.3		68.4		67.8		71		66.8		55.8
					56.8		68.7		69		71		58.6		68.5
					57.5		59.1		70.8		64		59.3		55.8
					53.4		63.7		63.5		66.5		56.1		65.1
					59.6		72.9		69.6		64.6		51.7		59.2
					63.1		63.7		51.9		67.1		51.7		53.3
					50.6		59.1		63.5		60.1		60.5		65.1
					47.1		54.5		66.1		65.2		71.2	Animal 6	58
					54		55.2		59.7		73.5		69.4		71.6
					58.1		69		52.1		69.7		67.6		66.5
					59.5		50.6		55.3		71.6		65.2		68.8
					54.2		67		58.4		65.2		65.2		64.2
					65.6		70.3		57.8		65.2		68.3		63.7
					70.3		61.1		62.2		60.1		65.8		72.7
					73.7		58.5		59.1		65.9		57.1		64.2
					54.7		57.2		56.5		69.1		73.2		80.6
					59.5		67.7		61.6		60.1		68.3		69.9
					64.2		76.2		64.2		67.1		63.3		48.5
					54.7		67.7		62.1		63.9		60.8		69.3
					60.2		65.7		65.1		67.5		60.8		63.7
					69.1		55.9		64.9		69.9		65.8		64.2
					58.9		54.5		67.6		62.7		59		58
					63.4		64.4		51.6		56		66.4		71
					64		66.4		57.9		69.3		63.3		64.2
					58.9		68.3		60		62.7		65.2		65.4
					60.2		61.1		68.3		63.9		75.1		55.8
					57		60.5		73.2		64.5		62.1		71.6
					61.4		76.2		56.5		57.2		55.9		68.7
					57.3		65.1		60		61.5		60.2		68.2
					66		67.7		51.4		59.1		62.8		65.9
					79.3		53.2		56.7		66.9		61.6		69.8
					68		58.5		56.7		58.5		62.2		78.8
					63.3		66.4		57.4		65.7		59		70.4
					66.7		63.7		59.4		63.3		55.1		74.9
					64.7		67		56.7		63.9		64.8		68.2
					70.7		59.1		64		68.7		76.3		76.5
					70		55.9		56.7		68.1		61.6		79.3
					80.4		59.8		53.4		62.1		72.4		69.3
					71		66.4		62.4		56		68.6		68.2
					95.6		57.8		61.7		57.2		67.8		65.9
					77.5		60.5		61		63.3		48.7		65.9
					83.3		61.8		63.7		58.5		70.2		69.3
					73.2		61.1		63.7		64.5		60.4		55.9
					85.5		57.8		57		53.6		61.6		68.7
					81.1		59.5		55.6		73.5		75.8		65.9
				Animal 7	76.3		75.3		57.7		63.9		62.2		50.3
					88.7		75.9		56.3		69.3		59.8		74.7
					63.3		74.1		61.7		61.5		54.2		72.7
					60.6		74.7		67		65		62.8		80.1
					61		66.8		55	EMG34	68.3	Animal 7	87.6		84.1
					65.6		67.4		60.3		101		67.9		66.8
					73		66.8		59		92.6		70.3		63.8
					67		71.6		53.6		94.9		76.5		70.2
					64.3	Animal 7	66.9		61		87.3		82.7		67.2
					61		68.5		55.6		89.6		82.7		61.8
					50.4		78		55		88.1		77.8		75.2
					76.3		94.7		55		83.5		72.8		71.7
					74.4		92.3		62.5		63.5		67.9		70.7
					72.1		91.5		55		88.1		59.7		62.3
					86		90		56.3		81.2		65.9		70.7
					69.8		97.9	Animal 7	58.6		89.6		62.8		82.1
					58.2		76.4		57.7		74.4		68.4		63.8
					74		78.8		75.9		87.3		75.2		68.2
					78.6		92.3		76.7		82		71.5		73.7
					62.9		80.4		75.1		75.9		75.2		81.1
					63.3		53.3		74.2		82.8		78.4	Animal 7	81.8
					61		117.8		75.9		91.1		63.4		87.5
					53.4		74.8		64.3		73.7		64.7		70.3
					62		74		90.7		81.2		71		72
					66.7		99.5		86.6		79.7		66.5		58.8
					74.6		55.5		83.3		90.4		74.2		61.6
					63.6		54.9		75.1		94.2		74.2		69.7
					62.8		58		79.2		76.7		70.4		80.6
					63.6		65.4		73.4		85.8		74.2		66.2
					71.5		54.3		68.5		88.8		56.1		66.8
					82.4		53.7		80		74.7		56.1		74.9
					78.5		78.3		78.4		76.5		81.3		75.5
					55.7		70.9		77.5		82.6		68.4		66.2
					85.6		67.2		125.4		61.2		84.5		74.9
					88.7		70.3		66		94.2		52.4		66.8
					57.3		60.4		70.1		78.3		75.2		74.3
					62.8		64.1		80		98.5		64.1		71.4
					55		66		70.1		59.4		75.2		73.1
					63.6		75.9		61.9		85.7		75.2		76.6
					90.3		59.8		62.7		85.7		76.5		66.2
					66.7		49.3		70.1		76.5		83.9		78.3
					65.2		60.4		76.7		78.3		64.7		80.6
					83.3		59.1		76.7		78.3		61		68
					75		78.9		54.9		62.4		70.3		64.5
					73.7		63.5		58		72.5		81.4		49.5
					80.7		52.4		56.7		59.7		83.9		63.7
					90.4		59.2		63.5		61.1		70.9		74.1
					92.3		71.5		60.4		81		61.7		61.3
					91		64.2		60.4		69.6		65.4		72.7
					100.6		87		64.8		66.1		66		81
					75.6		65.4		57.2		65.6		73.4		91.4
					74.3		60.6		64.8		60.4		74		89.4
					66		66.3		64.1		62.5		66.6		75.9
					78.2		64.2		63.5		76		79.5		77.9
					69.2		60.6		66		59.7		70.6		81.6
					67.9		65.8		67.8		57.6		77.4		80
					79.5		66.8		62.9		56.8		66.5		81
					84		75.6		69.7				68.6		67.5
					90.4		59.1		54.9				61.8		84.8
							54.9		59.2				50.9		58.3
							57		55.2						75.4
							59.1		67.6						80.1
							59.1		70.1						77.1
							63.2		58.9						73.6
							60.1		57						75.4
							71		60.1						57.7
							68.9		73.8						73.6
							53.9		67.6						72.4
									67						76
									67.6						75.4
									56.4						64.2
									57.7						70.7
									63.2						71.2
									58.5						85.4
									65.7						78.3
									60.8						77.1
									56.4						61.8
									62.6						70.1

## Sheet: Flat-inclined Norm. Amplitude
CTL		15cm/s						25cm/s						40cm/s						50cm/s							Same data recapitulated for making the graph	15cm/s		25cm/s		40cm/s		50cm/s
										Average values for each animal
	Amplitude	Flat	Ampl (% control)	Amplitude	Inclined	Ampl (% control)	Amplitude	Flat	Ampl (% control)	Amplitude	Inclined	% CTRL Ampl	Amplitude	Flat	% CTRL Ampl	Amplitude	Inclined	% CTRL Ampl	Amplitude	Flat	% CTRL Ampl	Amplitude	Inclined	% CTRL Ampl	Amplitude			Flat 15cm/s	Inclined 15cm/s	Flat 25cm/s	Inclined 25cm/s	Flat 40cm/s	Inclined 40cm/s	Flat 50cm/s	Inclined 50cm/s
Animal 1	0.289116	Animal 1	166.111	0.480253	Animal 1	146.381	0.423211	Animal 1	138.048	0.399118	Animal 1	158.499	0.458248	Animal 1	149.579	0.432458	Animal 1	163.703	0.473292	Animal 1	157.377	0.455002	Animal 1	165.99	0.479905		Animal 1	166.111	146.381	138.048	158.499	149.579	163.703	157.377	165.99
Animal 2	0.371954	Animal 2	142.49	0.529996	Animal 2	142.255	0.529124	Animal 2	125.566	0.467049	Animal 2	126.648	0.471072	Animal 2	135.979	0.505779	Animal 2	130.213	0.484334	Animal 2	122.167	0.454406	Animal 2	137.123	0.510034		Animal 2	142.49	142.255	125.566	126.648	135.979	130.213	122.167	137.123
Animal 3	0.418257	Animal 3			Animal 3			Animal 3	118.561	0.495888	Animal 3	123.592	0.51693	Animal 3	127.325	0.532544	Animal 3	106.859	0.446945	Animal 3	125.438	0.524653	Animal 3	138.701	0.580128		Animal 3			118.561	123.592	127.325	106.859	125.438	138.701
Animal 4	0.114474	Animal 4	145.808	0.166912	Animal 4	121.84	0.139475	Animal 4	137.591	0.157506	Animal 4	133.929	0.153314	Animal 4	131.979	0.151082	Animal 4	131.704	0.150767	Animal 4	131.979	0.137571	Animal 4	132.313	0.151464		Animal 4	145.808	121.84	137.591	133.929	131.979	131.704	131.979	132.313
Animal 5	0.371956	Animal 5	147.045	0.54694	Animal 5	129.693	0.4824	Animal 5	138.509	0.515193	Animal 5	128.649	0.478516	Animal 5	139.943	0.520525	Animal 5	132.366	0.492343	Animal 5	133.916	0.498109	Animal 5	135.943	0.505647		Animal 5	147.045	129.693	138.509	128.649	139.943	132.366	133.916	135.943
Animal 6	0.440427	Animal 6			Animal 6			Animal 6	119.982	0.528434	Animal 6	124.402	0.547902	Animal 6	145.371	0.640255	Animal 6	128.661	0.566656	Animal 6	134.498	0.592365	Animal 6	133.462	0.587805		Animal 6			119.982	124.402	145.371	128.661	134.498	133.462
Animal 7	0.435456	Animal 7			Animal 7			Animal 7	130.329	0.567526	Animal 7	142.263	0.619493	Animal 7	140.89	0.613512	Animal 7	141.963	0.618189	Animal 7	146.616	0.638451	Animal 7	145.481	0.633506		Animal 7			130.329	142.263	140.89	141.963	146.616	145.481
Mean		Mean	150.363		Mean	135.042		Mean	129.798		Mean	133.997		Mean	138.724		Mean	133.638		Mean	135.999		Mean	141.288			Mean	150.363	135.042	129.798	133.997	138.724	133.638	135.999	141.288
St Dev		St Dev	10.673		St Dev	11.3063		St Dev	8.61675		St Dev	12.5939			7.65031		St Dev	16.9911		St Dev	12.2156		St Dev	11.706			St Dev	10.673	11.3063	8.61675	12.5939	7.65031	16.9911	12.2156	11.706
										Individual values for each animal
Animal 1	0.299353	Animal 1		0.4758	Animal 1		0.40101	Animal 1		0.404384	Animal 1		0.388036	Animal 1		0.329949	Animal 1		0.445738	Animal 1		0.374164	Animal 1		0.420799
	0.358325			0.573017			0.393824			0.481115			0.378244			0.391232			0.465654			0.437077			0.487417
	0.42586			0.620373			0.444975			0.393098			0.421869			0.330951			0.539372			0.489599			0.50936
	0.35547			0.389435			0.414057			0.375465			0.433682			0.457978			0.521955			0.399949			0.561755
	0.297496			0.414851			0.380387			0.359496			0.454637			0.40018			0.456213			0.483876			0.507434
	0.303588			0.362953			0.428073			0.518578			0.390646			0.56893			0.597974			0.371232			0.547113
	0.284919			0.39777			0.397924			0.330288			0.436317			0.355753			0.664824			0.432293			0.459377
	0.32163			0.430844			0.420931			0.43661			0.424823			0.400714			0.490604			0.369766			0.37732
	0.237518			0.400615			0.417332			0.482075			0.408194			0.442592			0.539372			0.475877			0.517389
	0.184417			0.517045			0.392999			0.422049			0.451917			0.332745			0.46126			0.446992			0.519959
	0.280333			0.496522			0.326975			0.488774			0.477503			0.367783			0.518274			0.389635			0.416495
	0.269084			0.418797			0.396531			0.407702			0.436366			0.41805			0.509917			0.391217			0.522138
	0.210451			0.502223			0.466667			0.41919			0.408586			0.508271			0.431571			0.399641			0.474329
	0.301938			0.499097			0.37466			0.499292			0.405424			0.519964			0.39052			0.534404			0.489711
	0.243677			0.527288			0.527857			0.443576			0.514756			0.433319			0.432383			0.449886			0.354781
	0.285707			0.501439			0.445743			0.399968			0.343577			0.411664			0.537846			0.367554			0.504608
	0.255214			0.595226			0.492527			0.412609			0.398942			0.425802			0.53195			0.409865			0.412093
Animal 2	0.332343			0.50522			0.446802			0.441325			0.49613			0.477565			0.336127			0.435135			0.349492
	0.443924			0.513837			0.464918			0.327589			0.547475			0.429027			0.503824			0.394548			0.477858
	0.417849			0.493443			0.696461			0.360989			0.431636			0.649501			0.515763			0.532732			0.49199
	0.331417			0.450945			0.41243			0.324965			0.421747			0.420873			0.484536			0.570143			0.635486
	0.323904			0.339046			0.401344			0.31145			0.484611			0.434321			0.443178			0.538584			0.607791
	0.32327			0.354219			0.457687			0.39233			0.431562			0.376289			0.52294			0.492801			0.607803
	0.360904			0.547964			0.373992			0.410518			0.345673			0.4653			0.396798			0.574232			0.452671
	0.332401			0.412557			0.466132			0.379518			0.428842			0.388332			0.46041			0.556408			0.602433
	0.415073			0.432483			0.345893			0.498748			0.450544			0.373271			0.458466			0.400747			0.481145
	0.353553			0.595671			0.43888			0.296206			0.432751			0.402235			0.41323			0.589536			0.510301
	0.284444			0.324447			0.347921			0.368744			0.423573			0.418792			0.420923			0.356842			0.473007
	0.268587			0.612705			0.37915			0.499804			0.594396			0.390738			0.519259			0.419844			0.58222
	0.361993			0.481126			0.399673			0.341414			0.43802			0.394029			0.57764			0.400927			0.35304
	0.441285			0.514656			0.322908			0.371731			0.469367			0.445258			0.522964			0.397892			0.506891
	0.50999			0.471784			0.353525			0.351943			0.444454			0.360162			0.532688			0.430608			0.463267
	0.4066			0.577548			0.52272			0.494097			0.423389			0.501235			0.454527			0.42432			0.494192
	0.399615			0.637045			0.480137			0.396021			0.576064			0.469813			0.54144			0.42949			0.454715
	0.341376			0.505384			0.467313			0.416257			0.60458			0.406085			0.453899			0.601689			0.591919
	0.418597			0.451905			0.426179			0.332688			0.349631			0.477188			0.339722			0.446542			0.499826
Animal 3	0.405544			0.446602			0.511356			0.475247			0.448314			0.378669			0.423225			0.536667			0.342229
	0.426412			0.536432			0.290386			0.489478			0.513849			0.48304			0.413243			0.562118			0.482183
	0.431111			0.656362			0.492137			0.407264			0.45835			0.493627			0.369238			0.516863			0.412098
	0.49403			0.567702			0.474076			0.312303			0.432923			0.504799			0.479391			0.50678			0.665159
	0.340291			0.57516			0.591853			0.346108			0.545576			0.478358			0.541846			0.554389			0.387108
	0.391543			0.495913			0.309906			0.339804			0.538419			0.474235			0.426265			0.374486			0.606106
	0.422284			0.526504			0.401645			0.379796			0.499671			0.514735			0.508821			0.487297			0.567601
	0.617203			0.475964			0.409578			0.296953			0.471045			0.4428			0.378015			0.49599			0.551269
	0.521556			0.386204			0.562184			0.322416			0.497894			0.374468			0.461666			0.40103			0.431339
	0.383601			0.462769			0.482945			0.371123			0.565918			0.352124			0.486493			0.357562			0.500682
	0.351049			0.443089			0.351764			0.290243			0.430251			0.426257			0.401168			0.299523			0.429721
	0.306625			0.392713			0.373858			0.497681			0.599237			0.551646			0.394878			0.488403			0.500854
	0.394338			0.548994			0.376454			0.416481			0.422139			0.437104	Animal 2		0.354518			0.515654			0.42779
	0.464355			0.413329			0.402759			0.420417			0.552083			0.369201			0.431642			0.40746			0.381089
	0.537101			0.654664			0.272871	Animal 2		0.482851			0.51255			0.277692			0.36134			0.484815			0.571649
	0.436472			0.339667			0.376666			0.495353			0.401025			0.384664			0.491336	Animal 2		0.35872			0.513823
	0.297951			0.49089	Animal 2		0.560096			0.37944			0.429933			0.42229			0.396846			0.486773			0.430563
	0.307152			0.420213			0.489964			0.497101	Animal 2		0.439575			0.571675			0.437001			0.458179			0.354801
Animal 4	0.0799231			0.360389			0.385571			0.480716			0.506299			0.463571			0.365278			0.315498			0.534767
	0.104652			0.442094			0.575971			0.601773			0.348464			0.440784			0.475842			0.5507			0.444165
	0.120666			0.358586			0.560565			0.425341			0.375505	Animal 2		0.499633			0.442015			0.350721			0.427066
	0.094833			0.499039			0.434975			0.473744			0.482757			0.377576			0.449353			0.442579			0.392206
	0.116999			0.521692			0.529509			0.479802			0.484075			0.369922			0.498265			0.610053			0.365801
	0.144611			0.454937			0.53144			0.400114			0.343418			0.398414			0.443844			0.540602			0.415456
	0.149132	Animal 2		0.505			0.441984			0.530013			0.417597			0.487753			0.400289			0.40276			0.380616
	0.104077			0.639868			0.596212			0.324776			0.500163			0.528536			0.42467			0.568201			0.52627
	0.123561			0.63646			0.62097			0.417373			0.48928			0.517549			0.434892			0.515654			0.602864
	0.09021			0.501577			0.613567			0.440608			0.461957			0.456484			0.416235			0.531365			0.447923
	0.124913			0.448936			0.450268			0.415828			0.481069			0.463173			0.438141			0.432591			0.389822
	0.082668			0.693502			0.618477			0.47415			0.36805			0.621449			0.477112			0.483878			0.472599
	0.132957			0.496672			0.644266			0.431806			0.430661			0.407565			0.465427			0.462378	Animal 2		0.59037
	0.146284			0.599467			0.453923			0.385193			0.461201			0.449941			0.40087			0.479923			0.540044
	0.0883659			0.563956			0.443896			0.405846			0.424612			0.405078			0.430287			0.423686			0.560556
	0.113095			0.430037			0.556048			0.509156			0.49946			0.36898			0.474315			0.398672			0.552371
	0.129109			0.656883			0.429521			0.337502			0.467284			0.525276			0.489787			0.548955			0.445983
Animal 5	0.377321			0.800194			0.497629			0.53353			0.407382			0.395878			0.642852			0.398119			0.509967
	0.39062			0.632245			0.465899			0.464433			0.378635			0.423308			0.422992			0.545463			0.517018
	0.35455			0.7333			0.551456			0.466303			0.579283			0.424057			0.493682			0.6057			0.511249
	0.384868			0.48495			0.457934			0.49454			0.597094			0.653442			0.622796			0.447131			0.436236
	0.360014			0.617115			0.593588			0.432477			0.479961			0.42256			0.36248			0.4761			0.735005
	0.449044			0.398912			0.445077			0.364478			0.489174			0.447502			0.510488			0.334899			0.47039
	0.30484			0.677091			0.394661			0.350655			0.654975			0.491786			0.601707			0.502639			0.4246
	0.422003			0.582351			0.450812			0.471873			0.679168			0.417827			0.511091			0.401566			0.577978
	0.314626			0.619373			0.418632			0.471569			0.55873			0.528512			0.474788			0.456191			0.480087
	0.327141			0.628506			0.609106			0.524382			0.487856			0.517115			0.511306			0.531078			0.66157
	0.413491			0.583128			0.545983			0.557274			0.500919			0.613964			0.526369			0.464411			0.449368
	0.329962			0.546164			0.407143			0.498361			0.497877			0.6412			0.59056			0.379337			0.630983
	0.330402			0.552118			0.364411			0.435648			0.606114			0.421811			0.659163			0.46145			0.602007
	0.401918			0.692323			0.618721			0.463681			0.500058			0.469499			0.529102			0.35682			0.624836
	0.342177			0.45069			0.413834			0.514848			0.408911			0.659237			0.550148			0.371647			0.514766
	0.371706			0.576008			0.564875			0.484355			0.578967			0.626471			0.506249			0.438623			0.578175
	0.498663			0.667527			0.544315			0.439693			0.498774			0.518829			0.411027			0.346633			0.538417
	0.388575			0.535679			0.444008			0.45555			0.435021			0.5352			0.508745			0.381303			0.485576
	0.305235			0.54661			0.482692			0.759746			0.370231			0.674087			0.647909			0.57556			0.810477
Animal 6	0.572827			0.370376			0.514253			0.436929			0.491882			0.515352			0.71281			0.261028			0.651166
	0.488125			0.428411			0.491351			0.446788			0.376367			0.488164			0.469365			0.302085			0.494123
	0.360716			0.448936			0.47542			0.663429			0.631977			0.524817			0.345781			0.436237			0.491625
	0.498766			0.381811			0.552618			0.461506			0.352437			0.614688			0.528758			0.534326			0.423926
	0.586614			0.504986			0.508368			0.387652			0.498212			0.525373			0.473583			0.489381			0.634336
	0.456133			0.565293			0.533033			0.376675			0.432841			0.69379			0.461145			0.397014			0.618196
	0.383266			0.633684			0.473508			0.53847			0.43859			0.654891			0.47326			0.496363			0.417236
	0.480599			0.643723			0.565325			0.526415			0.355251			0.487126			0.432783			0.510019			0.48339
	0.343733			0.492803			0.434562			0.463031			0.416489			0.703617			0.599061			0.424216			0.707015
	0.430536			0.374921			0.683868			0.480838			0.450089			0.596168			0.464889			0.537796			0.389789
	0.353314			0.591369			0.559084			0.40542			0.421237			0.438761			0.595854			0.403268			0.662802
	0.404675			0.541173			0.659035			0.567011			0.437096			0.43654			0.542939			0.517245			0.397201
	0.451815			0.517398			0.588678			0.427537			0.560593			0.519891			0.483224			0.522725			0.483538
	0.479455			0.453596			0.50119	Animal 3		0.42225	Animal 3		0.632806			0.404523			0.453915			0.387712			0.371611
	0.315832			0.333959			0.832248			0.450451			0.559461			0.491013			0.510036			0.481934			0.4459
Animal 7	0.414732			0.542755			0.564557			0.412192			0.443372			0.373061			0.469946	Animal 3		0.348749			0.504609
	0.418734			0.540037			0.638794			0.465943			0.567563			0.472952			0.475584			0.498977			0.469814
	0.345815			0.552075			0.576139			0.627348			0.403414			0.486353	Animal 3		0.436382			0.391257			0.449878
	0.509915			0.476695			0.52756			0.516348			0.546691			0.660951			0.482389			0.485612			0.335074
	0.559982			0.352297			0.725232			0.523323			0.484076			0.430552			0.620901			0.557935			0.642619
	0.551377			0.46585			0.55974			0.51193			0.425051			0.528246			0.494365			0.605247			0.483226
	0.649918			0.434121			0.565531			0.338154			0.7384			0.523055			0.492527			0.611553			0.462402
	0.411853			0.513385			0.538449			0.481397			0.455064			0.441973			0.250168			0.398476			0.394046
	0.36873			0.384054	Animal 4		0.147662			0.439848			0.330775			0.556158			0.226618			0.797848			0.426638
	0.343394			0.389017			0.124272			0.543214			0.464264			0.513348			0.463205			0.528443			0.396708
	0.304034			0.473516			0.148284			0.494238			0.342153	Animal 3		0.483021			0.363579			0.472033			0.537776
	0.346993			0.425851			0.126929			0.463311			0.586237			0.447622			0.338852			0.354573			0.459263
				0.576426			0.150984			0.567035			0.359729			0.525713			0.470586			0.538667			0.475978
				0.753206			0.171137			0.399238			0.441077			0.576908			0.475439			0.618799			0.51968
				0.544726			0.130321			0.471414			0.49155			0.598914			0.394567			0.410955			0.360599
				0.47389			0.109207			0.458216			0.523171			0.421266			0.340317			0.491704			0.398664
				0.634374			0.12235			0.59612			0.462714			0.425702			0.31559			0.517815			0.367601
				0.461276			0.13524			0.472241			0.483566			0.465148			0.338191			0.456522			0.467497
				0.405212			0.125587			0.431293			0.549633			0.525194			0.579833			0.428479	Animal 3		0.415072
				0.306257			0.168099			0.432384			0.691733			0.527422			0.424406			0.514273			0.535917
				0.495651			0.15022			0.433079			0.442804			0.442796			0.442068			0.421421			0.558298
		Animal 4		0.197581			0.151393			0.337233			0.502868			0.455866			0.357203			0.498359			0.359673
				0.162484			0.155987			0.535111			0.505634			0.497843			0.4232			0.482902			0.543677
				0.218306			0.13336			0.52744			0.423933			0.633124			0.457777			0.373814			0.562897
				0.192942			0.166417			0.652428			0.505693			0.480663			0.538704			0.607581			0.558118
				0.168945			0.18127			0.412793			0.54979			0.735666			0.32044			0.472543			0.625131
				0.191804			0.128767			0.592623			0.546377			0.412546			0.338849			0.480809			0.558272
				0.236574			0.147041			0.59157			0.880696			0.563125			0.417338			0.640885			0.367741
				0.14243			0.132613			0.664573			0.391017			0.646778			0.350882			0.828146			0.397753
				0.194573			0.127567			0.447312			0.404513			0.492888			0.440256			0.510838			0.621354
				0.160387			0.126465			0.486323			0.458516			0.679797			0.631323			0.549213			0.659126
				0.239415			0.130776			0.426875			0.535745			0.488041			0.51122			0.46892			0.586126
				0.198912			0.122494			0.521311			0.62902			0.548087			0.321761			0.387957			0.727861
				0.129784			0.169613			0.494389			0.456966			0.486051			0.434656			0.523424			0.439071
				0.195915			0.230059			0.522139			0.40771			0.62977			0.456626			0.529918			0.515952
				0.132625			0.0691925			0.468857			0.462537			0.354362			0.389395			0.489074			0.468184
				0.182514			0.126105			0.578898			0.673647			0.426524			0.716274			0.550528			0.641859
				0.14321			0.119336			0.506872			0.685613			0.55196			0.462255			0.422816			0.682869
				0.126872			0.101627			0.514261			0.605657			0.577644			0.620582			0.51371			0.46099
				0.185523			0.147291			0.44592			0.471835			0.442926			0.666245			0.516366			0.744332
				0.187081			0.106362			0.447161			0.476269			0.477633			0.478395			0.743881			0.720024
				0.130468			0.125356			0.633007			0.607187			0.470623			0.492352			0.381811			0.397445
				0.175562			0.192629			0.622365			0.592887			0.43003			0.412312			0.589789			0.635153
				0.175526			0.182156			0.456806			0.423109			0.385391			0.496373			0.468894			0.659974
				0.123276			0.0995637			0.518773			0.576155			0.451776			0.483822			0.536279			0.726731
				0.1735			0.0538719			0.395591			0.515482			0.53294			0.501169			0.560485			0.345283
				0.124223			0.170822			0.273743			0.566346			0.479321			0.368142			0.565718			0.693712
				0.148064			0.148435			0.60097			0.424129			0.498211			0.514638			0.485747			0.80523
				0.155172			0.153891			0.385645			0.473405			0.537203			0.469607			0.59682			0.507421
				0.11407			0.0901229			0.447838			0.505752			0.51933			0.382042			0.518701			0.959197
				0.137468			0.14982			0.39136			0.722139			0.502366			0.469894			0.55713			0.63636
				0.215166			0.0427926			0.699204			0.517914			0.711648			0.498699			0.597169			0.606374
				0.162424			0.128621			0.545828			0.67502			0.601619			0.544822			0.452497			0.503001
				0.273865			0.119576			0.47995			0.45267			0.569249			0.495166			0.693832			0.724829
				0.128909			0.329874			0.58373			0.616329			0.537917			0.542553			0.458052			0.581886
				0.172721			0.162102			0.548967			0.482919			0.557369			0.474575			0.677999			0.459114
				0.141831			0.093331			0.548535			0.414713			0.661232			0.432416			0.705774			0.514564
				0.167255			0.12636	Animal 4		0.120093			0.450316			0.510134			0.292612			0.436315			0.716735
				0.202808			0.129285			0.164247	Animal 4		0.105154			0.720823			0.383794			0.630499			0.55673
				0.135226			0.132592			0.157766			0.129133			0.638945			0.351198	Animal 4		0.162514			0.716915
				0.159931			0.167345			0.135419			0.158951			0.58974			0.480204			0.0949732			0.548251
				0.164402			0.149086			0.163896			0.155378			0.53677	Animal 4		0.132481			0.103934			0.452613
				0.120782	Animal 5		0.518979			0.101728			0.117851			0.728548			0.0960122			0.121506			0.541185
				0.154815			0.561863			0.112463			0.190016			0.515824			0.184114			0.174849			0.657842
				0.183743			0.502642			0.173312			0.112215			0.601749			0.150454			0.130605			0.458677
				0.152086			0.637393			0.127204			0.103151			0.512709			0.097541			0.149679			0.536894
				0.189041			0.53866			0.164929			0.199991	Animal 4		0.209363			0.116918			0.0922771			0.666809
				0.168268			0.401306			0.148726			0.142321			0.140983			0.109256			0.187868			0.55578
				0.202514			0.491661			0.15772			0.0926245			0.196453			0.118749			0.157195			0.581141
				0.16973			0.539874			0.127847			0.170676			0.177365			0.137041			0.11213			0.566854
				0.191906			0.442208			0.164643			0.122143			0.159982			0.0965988			0.146684			0.683768
				0.115754			0.485011			0.153038			0.0881671			0.183086			0.116171			0.157747	Animal 4		0.149455
				0.147363			0.662079			0.161318			0.141401			0.0839788			0.0764842			0.148023			0.158458
				0.137522			0.538836			0.157532			0.103322			0.155432			0.135068			0.172114			0.110244
				0.210269			0.475352			0.161104			0.184635			0.117821			0.107256			0.187535			0.147224
				0.128268			0.498137			0.152596			0.115455			0.207977			0.189634			0.203696			0.14081
				0.132763			0.467447			0.180891			0.10759			0.132764			0.0900391			0.144606			0.129167
				0.215915			0.448872			0.140985			0.192784			0.114013			0.133548			0.151034			0.150251
				0.11211			0.642964			0.142543			0.217459			0.150197			0.124962			0.14288			0.153936
				0.152601			0.624672			0.110846			0.176814			0.120359			0.159245			0.046895			0.140033
				0.154711			0.476404			0.163604			0.203719			0.179062			0.131753			0.107501			0.166694
				0.17172			0.484188			0.163773			0.171011			0.145219			0.131122			0.0745057			0.104667
		Animal 5		0.611694			0.491149			0.13151			0.177006			0.149671			0.221926			0.0983042			0.182699
				0.698038			0.447995			0.122827			0.109888			0.183772			0.154249			0.0736534			0.129127
				0.546347			0.519451			0.163604			0.173025			0.142303			0.123797			0.117933			0.118929
				0.577207			0.416118			0.175903			0.143711			0.172636			0.195874			0.153201			0.163049
				0.492551			0.468729			0.128977			0.145485			0.115659			0.132721			0.14967			0.18503
				0.560289			0.414337			0.166896			0.175363			0.157148			0.147876			0.106229			0.112555
				0.601296			0.439537			0.0950198			0.195734			0.122293			0.152285			0.142803			0.141726
				0.374361			0.447577			0.136562			0.169764			0.168868			0.178124			0.134037			0.142234
				0.471738			0.507526			0.147005			0.123113			0.135104			0.14225			0.120993			0.170957
				0.519883			0.388572			0.141706			0.233045			0.167639			0.157316			0.146042			0.188267
				0.604506			0.515404			0.164318			0.165424			0.178289			0.160773			0.155611			0.144724
				0.600092			0.341114			0.160097			0.235587			0.114509			0.150001			0.0932256			0.121817
				0.609972			0.616686			0.194639			0.125151			0.133131			0.154214			0.137064			0.129157
				0.378958			0.398109			0.187229			0.161432			0.099516			0.160285			0.098956			0.179851
				0.574716			0.517886			0.179352			0.200218			0.153271			0.158142			0.126302			0.145849
				0.483323			0.561391			0.215238			0.138244			0.171843			0.177377			0.148327			0.175409
				0.482922			0.590731			0.190333			0.14473			0.131842			0.152125			0.150194			0.186295
				0.766411			0.547011			0.15257			0.20481			0.165933			0.184452			0.133506			0.131079
				0.592753			0.477362			0.219907			0.118617			0.170574			0.179021			0.1406			0.140362
				0.574147			0.583878			0.187697			0.143946			0.187253			0.178941			0.169414			0.17768
				0.553268			0.495547			0.158947			0.204961			0.184903			0.160196			0.193205			0.158787
				0.771727			0.414041			0.178073			0.126063			0.158318			0.136179			0.16344			0.168577
				0.476034			0.254185			0.160616			0.131554			0.142065			0.229579			0.149366			0.167073
				0.543622			0.395654			0.184183			0.148447			0.21712			0.163751			0.21551			0.142075
				0.503902			0.493752			0.172585			0.109301			0.122739			0.116491			0.0769017			0.161904
				0.656947			0.49904			0.15407			0.169753			0.147579			0.19918			0.138505			0.149235
				0.635365			0.427922			0.171293			0.124264			0.213669			0.16328			0.139138			0.201065
				0.541348			0.579899			0.155038			0.167678			0.149046			0.18407			0.164828			0.166475
				0.499656			0.375298			0.131854			0.174536			0.185864			0.140357			0.129422			0.151018
				0.528443			0.367514			0.156649			0.168422			0.161937			0.174195			0.154885			0.119337
				0.390259			0.457262			0.144096			0.218958			0.181075			0.145654			0.188902			0.164802
				0.796117			0.374853			0.182196			0.13033			0.0984549			0.195305			0.109642			0.149813
				0.46801			0.533507			0.216115			0.0846022			0.0561241			0.176381			0.14736			0.172869
				0.505574			0.434276	Animal 5		0.503018			0.14708			0.164666			0.211358			0.10163			0.135541
				0.443503			0.323348			0.375373	Animal 5		0.552985			0.113559	Animal 5		0.534051			0.144471			0.165778
				0.504353			0.459205			0.490567			0.390267			0.119876			0.426071			0.132677			0.153725
				0.584746						0.415245			0.421476			0.156188			0.664987	Animal 5		0.505069			0.15987
				0.444422						0.47494			0.448519			0.0943223			0.47547			0.485032			0.126835
				0.558834						0.474073			0.475952			0.149187			0.38767			0.432284			0.121188
				0.619568						0.485055			0.565342			0.148583			0.378067			0.443942			0.12317
				0.495593						0.429668			0.480611	Animal 5		0.579343			0.46434			0.444285			0.158715
				0.508298						0.58819			0.347511			0.429115			0.458381			0.584783			0.128777
				0.418394						0.547926			0.437074			0.601632			0.491164			0.406207			0.168545
				0.4813						0.444176			0.517189			0.476969			0.739158			0.410015			0.135988
				0.617562						0.629349			0.424442			0.405171			0.377988			0.430131			0.180835
				0.597902						0.587336			0.547646			0.494172			0.691377			0.489354			0.144891
				0.57515						0.503998			0.444309			0.465919			0.456828			0.527074			0.135201
				0.591684						0.373484			0.441183			0.724604			0.411837			0.593679			0.133557
				0.579263						0.58528			0.549498			0.510114			0.355163			0.46064			0.183355
				0.542753						0.513091			0.393363			0.472484			0.528683			0.471002			0.166095
				0.613717						0.393			0.456101			0.419333			0.53534			0.469441			0.177927
				0.557915						0.509692			0.42819			0.597526			0.539826			0.611017	Animal 5		0.530846
				0.462259						0.63605			0.593947			0.447381			0.43674			0.534533			0.77884
				0.539091						0.590414			0.545085			0.454596			0.40347			0.495378			0.426989
				0.492952						0.693059			0.423878			0.573614			0.508714			0.579696			0.478503
				0.477338						0.544555			0.657828			0.536769			0.522474			0.509657			0.52818
				0.397664						0.520632			0.523092			0.42184			0.37637			0.432081			0.543735
				0.544909						0.374254			0.486674			0.513105			0.539089			0.558644			0.349846
				0.685233						0.56291			0.458358			0.523989			0.432096			0.641339			0.418827
				0.580884						0.49282			0.376362			0.596159			0.408548			0.52286			0.517624
				0.49215						0.55646			0.361025			0.505336			0.379593			0.393535			0.394809
				0.497198						0.545688			0.399194			0.562852			0.412758			0.500341			0.514553
				0.561125						0.6154			0.457967			0.46462			0.414152			0.35605			0.544398
										0.486888			0.447202			0.684169			0.406746			0.445908			0.466276
										0.488259			0.427799			0.652701			0.453961			0.481224			0.617054
										0.518953			0.602904			0.426322			0.506727			0.423545			0.605248
										0.55113			0.543175			0.60524			0.705585			0.367115			0.532321
										0.412628			0.477616			0.453136			0.514055			0.445409			0.435331
										0.512168			0.402377			0.557771			0.470339			0.543397			0.49966
										0.536692			0.527665			0.56191			0.524763			0.478633			0.46593
										0.517106			0.534176			0.540009			0.43407			0.538403			0.644385
										0.555817			0.70507			0.420578			0.483994			0.494114			0.483307
										0.38192			0.567643			0.607804			0.479943			0.395018			0.475416
										0.650795			0.562998			0.430734			0.448541			0.501246			0.519883
										0.709666			0.4876			0.571725			0.443423			0.422609			0.513965
										0.626523			0.468197			0.499293			0.515344			0.668945			0.43884
										0.368602			0.430418			0.504746			0.611944			0.607755			0.473233
										0.493575			0.393088			0.475692			0.471549			0.58945			0.616422
										0.511258			0.4583			0.57977			0.386644			0.509423			0.473203
										0.404906			0.511705			0.444602			0.623613			0.446688			0.414897
										0.443812			0.42751			0.42905			0.584239			0.494036			0.456578
										0.479347			0.444526			0.463728			0.444344			0.54733			0.504448
										0.485685			0.439722			0.608181			0.56102			0.469363			0.414912
										0.485517			0.510779			0.508873			0.459683			0.454554			0.487086
										0.620521			0.434513			0.533074			0.543931			0.559611			0.500277
										0.542358			0.425976			0.791213			0.490414			0.525419			0.467481
										0.501661			0.490233			0.430281			0.598263			0.395954			0.422185
										0.392161			0.464507			0.487449			0.514134			0.567758			0.540362
										0.615512			0.453844			0.465314			0.538103			0.504835			0.377703
										0.414419			0.437537			0.486369			0.565492			0.452665			0.479873
										0.627138			0.549672			0.630428			0.551008			0.656757			0.612175
										0.605649			0.588796			0.538515			0.531236			0.618866			0.548193
								Animal 6		0.415563			0.510982			0.609875			0.434754	Animal 6		0.476772			0.498079
										0.4917			0.465636			0.545046	Animal 6		0.305674			0.445918			0.482674
										0.526289			0.363658			0.447264			0.572879			0.503544			0.464906
										0.574191			0.507075			0.495823			0.447801			0.671452			0.58382
										0.571027	Animal 6		0.636421			0.50013			0.372839			0.718556			0.532939
										0.632654			0.442648			0.569132			0.459725			0.819906			0.463008
										0.429126			0.536271			0.479314			0.670261			0.858769			0.640756
										0.446707			0.576136			0.415775			0.462913			0.461712			0.48808
										0.495333			0.501504			0.524366			0.466982			0.648165			0.644927
										0.599003			0.350301	Animal 6		0.556343			0.453034			0.624806			0.39883
										0.548817			0.604641			0.592236			0.415466			0.83182			0.478262
										0.401035			0.476541			0.451749			0.413715			0.503655			0.553614
										0.531598			0.634703			0.658886			0.389762			0.567023			0.56569
										0.54478			0.371676			0.563771			0.417379			0.614929			0.511436
										0.627536			0.572307			0.622372			0.723006			0.475242			0.499735
										0.52441			0.634249			0.645496			0.547672			0.646155			0.538104
										0.644741			0.625882			0.707811			0.595279			0.580269			0.484376
										0.499986			0.56737			0.64292			0.540948			0.465947			0.521509
										0.454129			0.417189			0.799487			0.485761			0.677805			0.474302
										0.710594			0.405425			0.763816			0.527049			0.657209	Animal 6		0.662452
										0.491878			0.420582			0.684251			0.57769			0.659026			0.602548
										0.406219			0.489501			0.69269			0.42403			0.64204			0.89765
										0.635056			0.722667			0.59296			0.458399			0.626542			0.439975
										0.542591			0.589875			0.672998			0.500277			0.616601			0.730202
										0.423754			0.674082			0.628007			0.405307			0.593793			0.660823
										0.504356			0.556724			0.703505			0.425024			0.647481			0.638822
										0.43098			0.520786			0.557712			0.417548			0.474708			0.608611
										0.441882			0.706428			0.809022			0.464404			0.61563			0.556551
										0.577724			0.550828			0.624518			0.557481			0.727849			0.466575
										0.330648			0.604968			0.569312			0.398263			0.423448			0.70047
										0.591133			0.570047			0.485034			0.639346			0.443161			0.584765
										0.573686			0.64382			0.465989			0.720077			0.456146			0.521331
										0.537429			0.481885			0.768155			0.604279			0.60033			0.641524
										0.373519			0.430991			0.560654			0.794365			0.519835			0.696463
										0.441786			0.667283			0.6242			0.735096			0.510396			0.606454
										0.547835			0.677634			0.637894			0.751121			0.696712			0.845867
										0.474137			0.690227			0.552065			0.595293			0.544639			0.686615
										0.468634			0.667218			0.717768			0.630484			0.451267			0.651873
										0.725861			0.56121			0.675628			0.659462			0.522179			0.548602
										0.500358			0.485248			0.697054			0.521827			0.527095			0.591765
										0.545527			0.459357			0.564513			0.470553			0.694417			0.746905
										0.453806			0.583624			0.487795			0.381843			0.48826			0.647167
										0.622395			0.486963			0.702038			0.513178			0.519359			0.571644
										0.537892			0.405019			0.588607			0.956567			0.774121			0.58528
										0.457286			0.492314			0.563096			0.652555			0.599151			0.541866
										0.523542			0.552301			0.752563			0.638865			0.628485			0.47516
										0.610329			0.547185			0.694587			0.569588			0.602396			0.465004
										0.479858			0.399817			0.751132			0.708346			0.442723			0.494439
										0.678209			0.562582			0.601529			0.571096			0.795059			0.561006
										0.578972			0.479381			0.729596			0.598505			0.684335			0.592077
										0.540241			0.649548			0.752162			0.600103			0.640699			0.665066
										0.649228			0.456605			0.556705			0.611704			0.681315			0.572563
										0.625801			0.495841			0.740256			0.535159			0.415291			0.531015
										0.604973			0.432582			0.441341			0.717501			0.40944			0.810101
										0.501395			0.673484			0.533213			0.519238			0.616156			0.577137
										0.546521			0.606374			0.597232			0.53933			0.594051			0.492119
										0.47605			0.563039			0.648099			0.693532			0.559367			0.461975
								Animal 7		0.590103			0.56687			0.664656			0.86213			0.672079			0.599417
										0.469742			0.435656			0.56157			0.835579			0.533709			0.526599
										0.721532			0.64492			0.530101			0.746623			0.783471			0.488158
										0.598961			0.619334			0.715231			0.729436			0.451845			0.38839
										0.622257			0.668473			0.568245	EMG34		0.421956	Animal 7		0.651098			0.439957
										0.587596			0.472247			0.598887			0.722994			0.344905			0.621451
										0.364556			0.523552			0.692771			0.630256			0.504035			0.55538
										0.431774			0.579701			0.649986			0.501723			0.805727			0.356823
										0.756612	Animal 7		0.371023			0.62727			0.460731			0.730901			0.50991
										0.340936			0.589812			0.592815			0.379768			0.709611			0.444208
										0.525611			0.447056			0.738823			0.521174			0.526224			0.63571
										0.699392			0.52703			0.627394			0.711327			0.8658			0.547809
										0.602902			0.544082			0.95867			0.594193			0.601358			0.468722
										0.543102			0.517838			0.586778			0.540902			1.00272			0.463055
										0.366772			0.518139			0.794103			0.622923			0.790208			0.719447
										0.698472			0.419574	Animal 7		0.613361			0.8684			0.689877			0.5247
										0.504132			0.619227			0.47244			0.499709			0.630601			0.707307
										0.413924			0.511565			0.640993			0.541305			0.682562			0.704493
										0.509321			0.440209			0.78622			0.618704			0.571072			0.647397
										0.527864			0.523707			0.536581			0.725054			0.654212			0.613293
										0.350784			0.778232			0.715648			0.458239			0.651488	Animal 7		0.747618
										0.658007			0.606995			0.85826			0.460793			0.64035			0.557357
										0.663539			0.66794			0.515568			0.587431			0.464495			0.630833
										0.822638			0.610881			0.357478			0.586818			0.54027			0.89126
										0.563329			0.66122			0.611077			0.575301			0.697254			0.705526
										0.378488			0.539999			0.573342			0.557492			0.557507			0.94391
										0.474946			0.582109			0.550194			0.571962			0.545219			0.390286
										0.564667			0.565415			0.561128			0.587246			0.743825			0.734374
										0.616763			0.8791			0.417533			0.518458			0.8356			0.96378
										0.589389			0.776085			0.553357			0.707271			0.593869			0.716751
										0.463214			0.701803			0.706838			0.480783			0.696072			0.620397
										0.657289			0.712997			0.622715			0.677013			0.515211			0.576161
										0.562249			0.502833			0.686022			0.754015			0.584368			0.498955
										0.64023			0.660272			0.668853			0.89106			0.740054			0.762476
										0.431137			0.598819			0.563298			0.725161			0.752956			0.598798
										0.524235			0.736989			0.35314			0.673815			0.615322			0.549757
										0.461355			0.670518			0.7123			0.625312			0.745734			0.83353
										0.436619			0.683227			0.405506			0.629712			0.531807			0.767512
										0.667135			0.608028			0.758156			0.702015			0.593184			0.527669
										0.469516			0.624438			0.530592			0.523525			0.750363			0.465434
										0.526356			0.566726			0.701115			0.661313			0.371611			0.778274
										0.697844			0.723699			0.389552			0.86396			0.504583			0.569166
										0.611363			0.87067			0.78045			0.508659			0.95839			0.695593
										0.742727			0.528024			0.615697			0.534199			0.755988			0.96007
										0.685307			0.701252			0.528071			0.777655			0.477094			0.563024
										0.69679			0.631478			0.542073			0.61693			0.541087			0.753287
										0.644867			0.638986			0.544404			0.731907			0.502644			0.756219
										0.427511			0.709726			0.758135			0.609067			0.767957			0.53759
										0.649406			0.774777			0.764934			0.83368			0.670449			0.747095
										0.403959			0.509565			0.51974			0.510062			0.507354			0.666436
										0.597023			0.732398			0.539845			0.650659			0.623243			0.591741
										0.800378			0.643389			0.497222			0.511002			0.620285			0.495715
										0.655016			0.587913			0.84626			0.509147			0.86077			0.717865
										0.643634			0.512595			0.674776			0.651655			0.566533			0.558517
										0.694794			0.549689			0.503298			0.570581			0.686477			0.605644
										0.531081			0.694613			0.70944			0.78478			0.324303			0.776559
										0.467947			0.784124			0.698089			0.784205			0.505672			0.62148
										0.688619			0.725286			0.5994						0.757759			0.65331
										0.448332			0.648952			0.80633						0.410635			0.622231
													0.612805			0.693235						0.784544			0.43264
													0.634938			0.653732									0.742373
													0.525614			0.503301									0.382288
													0.531373			0.558875									0.442592
													0.85868			0.69098									0.564164
													0.541444			0.676629									0.410047
													0.491614			0.390201									0.492589
													0.730751			0.719037									0.612629
													0.511314			0.95851									0.467151
																0.472449									0.486543
																0.700901									0.4707
																0.376506									0.728448
																0.660237									0.641452
																0.563942									0.493176
																0.728922									0.698661
																0.714668									0.81732
																0.717537									0.754816
																0.502191									0.445416
																0.579998									0.508143
