# Supplementary material for: Absent phasing of respiratory and locomotor rhythms in running mice
Source: eLife. 2020 Dec 1;9:e61919. doi: 10.7554/eLife.61919 (PMC7707822; doi:10.7554/eLife.61919)
Supplement: Figure 3—figure supplement 1—source data 1. [file elife-61919-fig3-figsupp1-data1.xlsx]

## Sheet: 5min
	HL			FL
	sin	cos		sin	cos
	158	40		156	40
Animal1	0.671188	-0.741287		0.952528	-0.304452
	-0.398146	0.917322		-0.315851	0.948809
	-0.246092	-0.969246		0.212117	-0.977244
	0.545259	0.838268		0.198276	0.980146
	-0.891646	-0.452732		-0.458339	-0.888778
	0.949218	0.314619		0.885343	0.464938
	-0.996801	0.0799284		-0.980242	-0.197802
	0.910276	-0.414003		0.984129	-0.177456
	-0.829091	0.559114		-0.841895	0.539642
	0.51172	-0.859152		0.774413	-0.63268
				-0.683053	0.730368
	0.976158	-0.21706		-0.942261	-0.33488
	-0.550923	0.834556
	0.176814	-0.984244		0.680654	0.732605
				-0.926494	0.376309
									HL				FL
									sin	cos	R		sin	cos	R
	0.520397	0.853924		0.556104	-0.831113			Animal1 mean	0.0254682	-0.00392166	0.0257683		-0.0670885	0.0192323	0.0697908
	-0.950378	-0.311098		-0.307258	0.951626			Animal2 mean	-0.0152397	-0.0184944	0.0239644		0.00290428	0.0471442	0.0472336
								Animal3 mean	-0.119948	-0.000100376	0.119948		0.10949	0.0371808	0.115631
								Animal4 mean	-0.0350382	-0.0228432	0.0418268		0.0149242	0.0263837	0.0303123
	0.52354	-0.852001		-0.745486	-0.666522
	0.214845	0.976648
	-0.779665	-0.626196
	0.96693	0.255043		0	1
	-0.994552	0.104246		-0.0532222	-0.998583
	0.723825	-0.689984		0.673869	0.738851
				-0.942841	-0.333242
	0.629551	0.776959		0.999523	-0.0308815
	-0.999858	-0.0168256		-0.716405	0.697685
	0.714865	-0.699263		-0.866801	-0.498654
	0	1		0.901024	-0.433769
	-0.561929	-0.827186		-0.629944	0.77664
	0.825385	0.56457		0.163473	-0.986548
	-0.999944	-0.010599
	0.696134	-0.717912		0.5006	0.865678
	-0.290548	0.95686		-0.842988	-0.537933
	0.101576	-0.994828		0.995371	0.0961119
				-0.794905	0.606735
	0.649058	0.760739		0.27738	-0.96076
	-0.981035	0.193831
	0.560359	-0.82825		0.221049	0.975263
	-0.439679	0.898155		-0.507469	-0.86167
	0.298198	0.954504		-0.320882	-0.947119
	-0.824981	-0.565161
	0.985295	-0.170864		0.803104	0.595839
	-0.316668	0.948536		-0.828762	0.559602
	-0.0799284	-0.996801		-0.0183709	-0.999831
				0.231632	0.972803
				-0.970663	-0.240444
Animal2	0.91496	-0.403545		0.216057	-0.976381
	-0.995884	-0.0906326
	0.999961	0.00885221		0.513948	0.857821
	-0.997698	0.0678158		-0.0903886	-0.995907
				-0.180037	0.98366
	0.854671	-0.51917
	-0.558577	0.829453
	-0.400025	-0.916504		0.39062	0.920552
				-0.511596	-0.859226
	0.361242	0.932472		0.778539	0.627596
	-0.108005	-0.99415		-0.983641	-0.180139
	0	1		0.934722	0.35538
	-0.249578	-0.968355		-0.956999	0.290091
	0.189372	0.981905		0.911346	-0.411642
	-0.577904	-0.816105		-0.958952	0.283567
	0.903768	0.428022		0.914914	-0.403648
	-0.99071	-0.135989
	0.964496	-0.264099
	-0.935527	-0.353256		-0.457714	0.889099
	1	-2.05172e-10		0.710556	-0.70364
	-0.995671	-0.0929499		-0.713304	0.700855
	0.969838	-0.243752		-0.249578	-0.968355
	-0.961001	0.276544
	0.848644	-0.528964		0.48336	0.875421
	-0.553049	0.833149		-0.643763	-0.765225
	0.0581448	0.998308		0.835774	0.549073
	-0.992781	0.119944		-0.999982	0.00603375
	0.699012	-0.71511		0.99248	-0.122411
				-0.999902	0.0140245
	0.322796	0.946468		0	1
	-0.59886	-0.800853		-0.13885	-0.990313
	0.879153	0.476539		0.990707	-0.136016
	-0.99507	0.0991795
	0.68648	-0.727149		0.269797	0.962917
				-0.993027	0.117887
	0.220037	-0.975491		-0.184481	-0.982836
	0.303559	0.952813		0	1
	-0.86734	-0.497715		-0.307548	-0.951532
	0.995618	-0.0935182		0.904004	-0.427524
	-0.798437	0.602078		-0.200329	0.979729
	0.180575	-0.983561		-0.478911	-0.877864
	0.627184	0.778871		0.694124	0.719856
	-0.997741	0.0671745		-0.979344	-0.2022
				0.945817	-0.324699
				-0.348055	0.937474
Animal3	0	1		-0.732757	0.680491
	-0.423487	0.905902
	-0.913966	-0.40579		0.320105	-0.947382
	-0.999998	0.00202683		-0.0169808	-0.999856
	-0.360781	0.93265		0.374892	-0.927068
	-0.997188	-0.0749417		0.970332	-0.241776
				8.20414e-10	1
										0
	0.611795	-0.791016		0.977022	-0.213137
	0.677022	0.735963		-0.830839	-0.556514
	-0.702006	0.712171
	0.605923	0.795523		0.507691	-0.861539
	-0.983969	-0.178338
	-0.5	-0.866025		0.985981	0.166858
	0.871274	-0.490796		0	1
	-0.52952	0.848298		-0.288238	-0.957559
	-0.589979	-0.807419		0.982588	0.1858
	0.815561	0.578671		0.564215	0.825628
	-0.698555	0.715556		-0.717757	0.696294
	-0.679072	-0.734072		0.369107	-0.929387
	0.0599308	-0.998203		0.600352	0.799736
				-0.978319	-0.207104
	0.888251	0.459359		0.33179	-0.943353
	-0.651462	0.758681
	-0.860878	-0.508811		0.853828	0.520556
				-0.305144	0.952306
	0.454733	-0.890628		0.398685	-0.917088
	-0.406286	0.913746
	-0.619565	-0.784945		0.642113	0.76661
				-0.970466	0.241238
	0.996861	0.0791774		0.994236	0.107216
	-0.689051	0.724713
	0.452819	-0.891603		0.603495	0.797367
				-0.480468	0.877012
	-0.625358	-0.780338		-0.683403	-0.730042
	0.678431	-0.734664		0.651061	-0.759026
	0.660106	0.751172		0.725974	0.687722
	-0.776479	0.630143		-0.635207	0.772342
	-0.421676	-0.906747		0.408986	0.91254
				-0.987976	-0.154609
	0.738212	-0.674569		-0.132407	-0.991195
	0.999857	0.0168895		0.997416	0.0718443
	0.326014	0.945365		0	1
	-0.999964	0.00849069		-0.83441	0.551144
	0.0344272	-0.999407		-0.504868	-0.863197
Animal4	0.50745	0.861681		0.261864	0.965105
	-0.252268	-0.967657		-0.446292	-0.894887
	0.100362	0.994951		0.407322	0.913285
	0.691387	-0.722485		0.0799755	-0.996797
	-0.992883	0.119097		-0.756702	0.65376
	0.824529	0.56582		0.999985	0.00547858
	-0.428487	-0.903548		-0.697356	-0.716725
	-0.279625	0.960109
	0.339847	-0.940481		0.167943	0.985797
	-0.762317	0.647204		0.415483	-0.909601
				-0.524859	0.851189
	0.953237	-0.302223		0.878707	-0.477362
	-0.992213	0.124551		-0.990735	0.135807
	0.102659	0.994717		0.999694	-0.0247494
	0.335083	-0.942188		-0.989821	0.142315
	-0.649259	0.760568
	0.855364	-0.518027		0.970545	0.240919
	-0.877983	0.478692		-0.934135	0.35692
	0.764386	-0.644758		0.960842	-0.277096
	-0.877096	0.480316		-0.963934	0.266141
	0.957914	-0.287054		0.996601	-0.0823781
	-0.996615	-0.082208		-0.983447	-0.181198
	0.188838	-0.982008		0.996195	-0.0871557
				-0.671383	0.74111
	0.811143	0.584848		0.149741	-0.988725
	-0.979519	-0.201351
	0.998339	0.057612		0.229009	0.973424
	-0.473778	0.880644		-0.86331	-0.504673
	-0.997859	-0.0654031		0.935127	-0.354312
				-0.395803	0.918335
	-0.598519	-0.801108		0.166615	-0.986022
	0.763068	-0.646319		0.425233	0.905084
				-0.347964	-0.937508
	0.606298	-0.795238		0.591117	0.806586
	-0.185041	0.982731		-0.621184	-0.783665
	0.0876797	-0.996149		0.857527	0.51444
				-0.951057	0.309017
	0.185065	0.982726		0.408558	-0.912732
	-0.913573	-0.406674
	0.838339	-0.545149		0.0893338	0.996002
	-0.416391	0.909185		-0.63145	-0.775417
	-0.0952775	-0.995451		0.73516	0.677893
				-0.906169	0.422917
	0.303001	0.95299		0.549991	-0.835171
	-0.359553	-0.933125
	0.316039	0.948746
	-0.838335	-0.545156

## Sheet: 10min
	HL			FL
	sin	cos		sin	cos
	155	38		152	41
Animal1	0.371662	-0.928368		-0.282869	-0.959158
	0.0892156	0.996012		0.873128	0.487491
	-0.739051	-0.673649		-0.800306	0.599592
	0.905818	-0.423667		-0.351869	-0.936049
	0	1		0.913256	0.407386
	-0.843702	-0.536811		-0.96721	0.25398
	0.994599	-0.10379		0.867284	-0.497814
	-0.950596	0.310429		-0.752022	0.659138
	0.783838	-0.620966		0.791902	-0.610648
	-0.869763	0.49347
	-0.707505	-0.706709		0.777169	0.629292
				-0.96193	0.273294
	0.991189	-0.132453		-0.843374	-0.537327
									HL				HL
									sin	cos	R		sin	cos	R
	0.438963	0.898505		0.418879	-0.908042			Animal1 mean	0.0353274	0.0549812	0.0653526		-0.0550845	-0.0433945	0.070124
	-0.570876	0.821036						Animal2 mean	-0.0679132	-0.0493754	0.0839651		-0.00466109	0.0459514	0.0461871
								Animal3 mean	-0.0178268	-0.044455	0.0478962		0.0886022	0.0958919	0.130559
								Animal4 mean	0.0194681	0.0506509	0.0542635		0.0241951	0.071346	0.075337
	0.0587065	-0.998275		0.263746	0.964592
				-0.999043	0.0437408
	0.762072	0.647492		-0.481142	-0.876643
	-0.707463	0.70675
	-0.655562	-0.755141		0.0213698	-0.999772
	0.980001	-0.198993		0.887352	0.461093
	-0.907917	0.419149		-0.965762	-0.259431
	0.282594	-0.95924		0.275548	-0.961287
	0.742292	0.670076		0.456306	0.889823
	-0.829275	0.558841		-0.901386	-0.433016
	0.962216	-0.272288		0.973472	0.228807
				-0.829723	0.558175
	0.351375	0.936235		0.99519	-0.0979675
	-0.461797	0.886986		-0.991349	0.131251
	-0.689429	-0.724354		0.92101	-0.389538
				-0.643955	0.765064
	0.983201	0.182527		-0.125826	-0.992052
	-0.739512	0.673144
	0.346522	-0.938042		-0.0187883	-0.999823
	0.999929	0.0119408		0.38392	0.923367
	-0.307571	0.951525		-0.995046	-0.0994156
	-0.999056	-0.0434471		0.995992	-0.0894475
				-0.875805	0.482665
	0.236474	-0.971638		0.634393	-0.77301
				-0.60042	0.799685
	0.966869	0.255274		0.146694	0.989182
	-0.544919	0.838489		-0.983546	-0.180659
	0.0440562	-0.999029		0.730009	-0.683437
				-0.299649	0.95405
	0.574843	0.818264		0.0859362	-0.996301
Animal2	-0.998221	-0.0596151		0.807027	-0.590515
	0.866025	-0.5
	-0.886063	0.463564		0.895911	0.444233
				-0.673518	0.739171
	0.425779	0.904827		-0.295379	-0.95538
	-0.949552	0.31361
	0.283957	-0.958837		0.847956	0.530067
				-0.636285	0.771454
	0.894646	0.446776		-0.825472	-0.564443
	-0.989668	0.143379
	-0.990482	-0.137641		0.952714	-0.303868
	-0.740622	-0.671922		0.91215	0.409857
				-0.332855	0.942978
	0.582063	-0.813144		-0.946076	-0.323946
	0.541284	0.84084		0.684682	-0.728842
	-0.541284	0.84084
	-0.920815	-0.390001		0.872243	0.489074
				-0.730052	0.683392
	0.810068	-0.586336		-0.75184	-0.659346
	0.15432	0.988021		0.43801	-0.89897
	-0.751364	-0.659888
	0.959014	-0.283359		0.974025	0.226439
	-0.83121	0.555958		-0.419618	0.907701
	0.0890753	-0.996025		-0.146762	-0.989172
	0.999991	-0.00416656		0.669739	0.742596
	-0.255464	0.966819		-0.999624	0.0274217
	-0.705935	-0.708277		0.853666	-0.52082
	0.808015	-0.589162		0	1
				-0.990797	0.135356
	-0.99925	0.0387319		-0.0665003	-0.997786
	0.0687397	-0.997635		0.877425	0.479713
				-0.665191	0.746673
	0.943317	-0.331894		-0.663379	-0.748284
	0	1		0.67398	-0.738749
	-0.992055	0.125804
	0.73873	-0.674002		0	1
				-0.776119	0.630586
	0	1		-0.338433	-0.940991
	-0.902585	-0.430511
	0.401205	-0.915988		0.998976	0.0452338
				-0.646083	0.763267
	0.600228	0.799829		-0.0507473	-0.998712
	-0.854301	0.519778
	0.189065	-0.981965		0.645754	0.763546
				-0.672008	0.740544
	0.987824	-0.155577		-0.84491	-0.534908
	-0.380678	0.924708
	-0.302412	-0.953177		0.618758	-0.785581
				-0.437814	0.899065
Animal3	0.151322	-0.988484		0.999677	-0.025401
	0.61348	-0.78971		0.161231	0.986917
				-0.526635	0.850092
	0.844246	0.535956		-0.906849	-0.421455
	0.914063	-0.405572		-0.789439	0.61383
	0.197433	0.980316		-0.453174	-0.891422
	-0.480011	0.877262
	-0.581168	-0.813784		0.431808	-0.901966
	0.437956	-0.898996		0.446115	0.894976
	0.996896	0.0787332		0.671793	0.740739
	-0.921939	0.387335		-0.897182	0.44166
	-0.933746	0.357935		0.75469	-0.656081
	0.991201	0.132367		0	1
	-0.651325	0.758799		-0.996028	-0.0890441
	-0.948243	-0.317546		0.359587	-0.933111
	-0.572099	-0.820184		0.998978	-0.0452015
	0.873117	-0.48751		0.665141	0.746718
				-0.32286	0.946447
	0.326489	0.945201
	-0.422279	0.906466
	-0.489165	-0.872191		0.415104	-0.909774
	0.714743	-0.699387		0.83121	0.555958
				-0.678869	0.734259
	0.733842	0.67932		-0.658787	-0.75233
	-0.584938	0.811078
	-0.562853	0.826557		0.515554	-0.856857
	-0.0959146	-0.99539		0.604753	-0.796413
	-0.886897	-0.461967		0	1
				-0.812235	-0.58333
	-0.235575	-0.971856		0.949449	0.313921
	0.714191	0.699951		0	1
	-0.994592	0.103861		-0.0836037	-0.996499
	0	1		0.71909	0.694917
	-0.988236	-0.152934		-0.526252	0.850329
	0.187572	-0.982251		0.759005	-0.651085
				-0.623927	0.781482
	0.146277	0.989244
	-0.809448	-0.587191
	0.543317	-0.839528		0.229756	0.973248
				-0.124115	-0.992268
	0.550331	-0.834947		0.406737	-0.913545
	-0.516619	0.856215
	0.954613	0.297849		0.669957	0.7424
	0.10654	-0.994308
Animal4	0.97772	-0.209915		0.990151	-0.140001
	-0.211682	0.977339		-0.999484	0.0321265
	0.996812	0.0797861		0.928767	0.370663
	-0.926233	-0.376951		-0.974812	-0.223028
	0.885898	0.463881		0.907716	0.419585
	-0.806437	-0.59132		-0.912542	-0.408982
	0.651993	0.758225		0.882624	0.47008
	-0.550854	-0.834602		-0.727087	-0.686545
	0.580248	-0.81444		0.990897	-0.13462
	-0.252585	0.967575		-0.956599	0.291409
	-0.26047	-0.965482		0.694255	-0.719729
	0.818123	0.575043		0.403667	0.914906
	-0.992502	0.122225		-0.959251	0.282556
	0.919102	-0.394019		0.290457	-0.956888
	-0.459042	0.888415
	-0.801834	-0.597546		0.541906	0.840439
				-0.830434	-0.557118
	0.977857	-0.209274		0.809685	0.586865
	0.882138	-0.47099		8.20414e-10	1
	-0.669678	0.742651
	-0.327575	-0.944825		0.998017	-0.0629429
				-0.163405	0.986559
	0.853247	0.521508		-0.626751	-0.77922
	-0.888314	-0.459237
	0.908288	-0.418346		0.329913	0.944011
				-0.969494	0.245117
	0.446141	0.894963		0.368916	-0.929463
	-0.99708	-0.0763634
	0.496138	-0.868244		0.431252	0.902232
				-0.952538	-0.304419
	0.568397	0.822755		0.880713	-0.47365
	-0.991876	-0.127205		-0.675358	0.73749
	0.965791	-0.259322		0.68716	-0.726506
	-0.93399	0.357299
	0.695273	-0.718746		0.102052	0.994779
	-0.299363	0.954139		-0.357572	-0.933885
	-0.43257	-0.9016		0.665825	0.746108
				-0.895061	-0.445945
	0.98902	-0.14778		0.932531	0.36109
	-0.476609	0.879115		-0.98929	-0.145962
	-0.663906	0.747816
	-0.668499	0.743713
	-0.13486	0.990865
	0.606291	-0.795243
	-0.69379	0.720177
