# Supplementary material for: Absent phasing of respiratory and locomotor rhythms in running mice
Source: eLife. 2020 Dec 1;9:e61919. doi: 10.7554/eLife.61919 (PMC7707822; doi:10.7554/eLife.61919)
Supplement: Figure 3—source data 1. [file elife-61919-fig3-data1.xlsx]

## Sheet: Flat 15cm
	HL			FL
	sin	cos		sin	cos
	183	42		179	41
Animal1	0.342775	0.939418		0.955274	0.295722
	0.981154	-0.193229		0.37501	-0.927021
	0.158362	-0.987381		-0.874679	-0.484702
	-0.885327	-0.464969		-0.434103	0.900863
	-0.644017	0.765011		0.799019	0.601306
	0.652416	0.757861		0.799019	-0.601306
	0.594092	-0.804397		-0.324074	-0.946032
	-0.930533	-0.366207		-0.988992	0.147969
	0.634439	0.772973		0.044419	0.999013
	0.779484	-0.626422		0.882748	0.469846
	-0.618338	-0.785912		0.76874	-0.639561
				-0.302738	-0.953074
	0.646154	0.763207		-0.996787	-0.0801028
	0.939591	-0.342299		-0.599518	0.800362
	-0.110261	-0.993903		0.05968	0.998218
	-0.996892	0.0787819		0.862584	-0.505914
	-0.285519	0.958373		-0.664518	-0.747272
	0.96901	0.247021		-0.554552	0.832149
	0.368249	-0.929727		0.692483	0.721435
	-0.84823	-0.529628		0.766231	-0.642565
	-0.613587	0.789627		-0.66041	-0.750906
	0.780559	0.625082		-0.770691	0.637209
	0.829372	-0.558696		0.57596	0.817478
	-0.286016	-0.958225		0.922593	-0.385775
	-0.990723	0.135894		-0.318101	-0.948057
	0.0306789	0.999529		-0.990474	0.137699
	0.871664	0.490104		0.134711	0.990885
	0.798017	-0.602635		0.995268	0.0971667
	-0.27601	-0.961155		0.110766	-0.993847
	-0.986997	-0.160738		-0.946898	-0.321535
	-0.590603	0.806963		-0.302431	0.953171				HL				HL
	0.0968854	0.995296		0.991881	0.127173				sin	cos	R		sin	cos	R
	0.852993	-0.521922		-0.328064	-0.944656			Animal1 mean	0.0285357	-0.0229843	0.036641		0.00152912	0.0118085	0.0119071
	-0.618737	-0.785598		-0.698171	0.715931			Animal2 mean	-0.0104851	0.0683239	0.0691238		0.023772	0.0426357	0.0488151
	-0.619469	0.785021		0.995643	0.0932431			Animal3 mean	-0.000672456	0.0342337	0.0342403		-0.0186806	0.0470654	0.0506372
	0.644574	0.764542		-0.163827	-0.986489			Animal4 mean	0.0266661	0.0124032	0.0294095		0.0409849	0.0402949	0.0574756
	0.790949	-0.611883		-0.803878	0.594794
	-0.651244	-0.758868		0.202297	0.979324
	-0.784476	0.620159		0.951273	-0.308349
	0.562235	0.826977		-0.360471	-0.93277
	0.929348	-0.369206		-0.739531	0.673123
	-0.33193	-0.943304
	-0.985595	0.169123
Animal2	0.495939	0.868358		0.164364	0.9864
	0.298844	0.954302		0.999893	-0.0146466
	-0.558002	-0.82984		0.203626	-0.979049
	-0.830362	0.557224		-0.998558	-0.0536804
	0.637847	0.770164		0.0611169	0.998131
	0.91226	-0.409611		0.999279	0.0379662
	-0.0821798	-0.996618		-0.0601324	-0.99819
	-0.938704	-0.344723		-0.94216	0.335162
	-0.399859	0.916577		0.411751	0.911296
	0.982075	0.18849		0.974244	-0.225496
	0.19413	-0.980976		-0.053403	-0.998573
	-0.999993	0.00365665		-0.969203	-0.246264
	8.20414e-10	1		-0.462538	0.886599
	0.280227	0.959934		0.657778	0.753212
	0.994803	-0.101823		0.736057	-0.67692
	0.00784605	-0.999969		-0.764473	-0.644655
	-0.984041	-0.177939		-0.416844	0.908978
	-0.376513	0.926411		0.885046	0.465504
	0.624808	0.780778		0.338887	-0.940827
	-0.077534	-0.99699		-0.832876	-0.55346
	-0.834697	0.550709		-0.754909	0.65583
	0.702801	0.711387		0.780913	0.62464
	0.472674	-0.881237		0.23069	-0.973027
	-0.984249	-0.176788		-0.985242	-0.171168
	0.599071	0.800696		0.200727	0.979647
	0.71311	-0.701052		0.943261	-0.332051
	-0.753036	-0.657979		-0.489051	-0.872255
	-0.53832	0.84274		-0.92325	0.384201
	0.888432	0.459009		0.19489	0.980825
	0.171216	-0.985233		0.867113	-0.498111
	-0.962683	0.270632
	0.376087	0.926584		0.510775	0.859714
	0.757919	-0.652349		0.558036	-0.829817
	-0.922674	-0.38558		-0.958937	0.283619
	0.106701	0.994291		0.380611	0.924735
	0.705858	-0.708354		0.831872	-0.554967
	-0.873326	-0.487136		-0.917549	-0.397622
	-0.274775	0.961508		-0.113725	0.993512
	0.910291	0.413968		0.980971	-0.194153
	0.447119	-0.894474		-0.596932	-0.802292
	-0.863684	-0.504034		-0.721241	0.692684
	-0.465795	0.884893
Animal3	0.320584	0.94722		0.815796	0.57834
	0.901672	-0.432421		-0.328218	-0.944602
	-0.649095	-0.760708
	-0.259318	0.965792
				0.338828	0.940848
	0.66708	-0.744986		0.554875	-0.831934
	-0.999225	-0.0393582		-0.811814	-0.583916
	8.20414e-10	1		-0.199186	0.979962
	0.738363	-0.674404		0.973912	-0.226927
	-0.924255	-0.381775		-0.783942	-0.620835
				-0.150905	0.988548
	0.220311	0.97543		0.873666	0.486527
	0.953319	-0.301967		0.284903	-0.958556
	-0.177119	-0.984189		-0.993492	-0.1139
	-0.974251	-0.225466		8.20414e-10	1
	-0.116093	0.993238
				0.98664	0.162913
	0.94559	0.325361		0.170679	-0.985327
	0.51409	-0.857736		-0.811581	-0.58424
	-0.877988	-0.478682		-0.736472	0.676468
	-0.367067	0.930194
				0.999232	0.0391915
	0.9382	-0.346092		-0.327512	-0.944847
	-0.806904	-0.590683		-0.952066	0.305894
	8.20414e-10	1
				0.708121	0.706091
	0.998603	0.0528387		0.587475	-0.809242
	-0.0641471	-0.99794		-0.825236	-0.564788
	-0.984625	0.174681		-0.443469	0.89629
	8.20414e-10	1
				-0.0789209	-0.996881
	0.215159	0.976579		-0.998143	0.0609214
	0.979026	-0.203735		-0.0876685	0.99615
	-0.13512	-0.990829
	-0.944378	0.328861		0.951895	-0.306424
	-0.0989182	0.995096		-0.586525	-0.809931
				-0.710539	0.703658
	0.962168	0.272456
	-0.581464	-0.813572		0.929718	0.368272
	-0.504411	0.863463		-0.137193	-0.990544
				-0.626883	0.779113
	0.917525	0.397678
	0.226271	-0.974064		0.596934	0.802291
	-0.998414	0.0562975		0.400966	-0.916093
				-0.734644	0.678453
	0.130782	0.991411
	0.928026	-0.372515		0	1
	-0.67697	-0.736011		0.936926	-0.349527
	-0.415159	0.909749		-0.987511	0.157547
	0.851628	0.524147		0.600571	0.799572
	0.728742	-0.684788		0.396649	-0.91797
	-0.738199	-0.674583		-0.968666	-0.248366
				8.20414e-10	1
	0.412573	0.910925
	0.40959	-0.91227		0.94155	-0.336873
	-0.988287	0.15261		-0.770454	-0.637495
				-0.323199	0.946331
	0.323503	0.946227
				0.398183	0.917306
	-0.0480234	-0.998846		0.797473	-0.603354
	-0.986324	0.164817		-0.786104	0.618094
Animal4	0.73809	-0.674702		0.885759	-0.464145
	0.563399	0.826185		-0.907698	-0.419623
	-0.794935	-0.606694
	-0.0141055	0.999901
				0.246419	0.969163
	0.999382	-0.0351434		0.757118	-0.653278
	-0.100886	-0.994898		-0.995117	-0.0987003
	-0.933449	0.35871
				0.169861	0.985468
	0.496803	0.867863		0.895465	-0.445131
	0.96371	-0.266951		-0.93015	-0.367181
	-0.92297	-0.384872
	-0.864706	0.502279		0.281356	0.959604
				-0.0561475	-0.998422
	0.120372	0.992729		-0.816319	0.577601
	0.938953	-0.344044
	-0.77429	-0.63283		0.474022	0.880513
	-0.313522	0.949581		0.505987	-0.862541
				-0.832063	0.554681
	0.958777	0.284158
	0.0283367	-0.999598		0.897385	0.441248
	-0.998595	0.0529823		-0.0513	-0.998683
				-0.710765	0.70343
	0.52689	0.849934
	0.857083	-0.515178
	-0.453402	-0.891306		0.863212	0.504842
	-0.93757	0.347797
	0.439328	0.898327		0.493676	0.869646
	0.677756	-0.735287		0.813036	-0.582213
	-0.900761	-0.434314		-0.828494	-0.559998
	0.15156	0.988448		0.0678512	0.997695
	0.605337	-0.795969		0.684825	-0.728707
	-0.552044	0.833815		-0.914106	-0.405476
				-0.316978	0.948433
	0.998724	-0.0505076
	0.0702435	-0.99753		0.991209	-0.132306
	-0.970942	0.239316
				-0.137925	0.990443
	0.892806	0.450441
	0.0141754	-0.9999		0.809064	0.58772
	-0.912493	0.409093		0.760629	-0.649187
				-0.740367	-0.672203
	0.950603	0.31041		-0.502909	-0.864339
	-0.154444	-0.988001
	-0.830068	0.557662		0.254084	0.967182
				0.971202	-0.238259
	0.994871	0.101147		-0.65822	-0.752826
	-0.698036	-0.716062
				0.0945167	0.995523
				0.98543	-0.170079
	0.351204	0.936299		-0.0452101	-0.998978
	0.745933	-0.666021		-0.982232	0.187671
	-0.672726	-0.739892
	-0.524466	0.851431		0.434861	0.900498
				0.88021	-0.474585
	0.850524	0.525936		-0.825959	-0.563731
	0.369986	-0.929037		-0.697989	0.716109
	-0.941403	-0.337284
	-0.388359	0.921508		0.999684	-0.0251301
				-0.352495	-0.935814
	0.940612	0.339484		-0.922673	0.385584
	0.0201295	-0.999797
	-0.278115	0.960548		0.576809	0.816879
				0.763852	-0.645392
				-0.980288	-0.197573
				-0.343863	0.93902

## Sheet: Flat 25cm
	HL			FL
	sin	cos		sin	cos
	277	41		280	41
Animal1	0.997045	-0.0768164		0.800413	0.599448
	-0.879254	-0.476354		-0.119621	-0.99282
				-0.768088	0.640344
	0.698827	0.715291		0.777101	-0.629376
	-0.978862	0.204523		-0.717385	0.696677
	0.885137	-0.46533		0.952246	-0.305333
	-0.977359	-0.211589		-0.980771	-0.19516
	0.173702	0.984798		0.973472	0.228807
	0.901424	-0.432937		-0.980416	0.196936
	-0.97499	-0.222248
	0.0457539	0.998953		0.710327	-0.703872
	0.718918	-0.695095		-0.818706	0.574213
	-0.97142	-0.237369
	0.421613	0.906776		0.031802	-0.999494
	0.862199	-0.506569
	-0.71612	-0.697978
	-0.733144	0.680073
	0.82854	0.55993		0	1
	0.352445	-0.935832		0.294925	-0.95552
	-0.962115	-0.272644
	0.246259	0.969204		0.207912	0.978148
	0.858257	-0.51322		0.700839	-0.713319
	-0.987811	-0.15566		-0.763264	0.646087				HL				FL
									sin	cos	R		sin	cos	R
	0.919556	-0.392958		-0.441795	-0.897116			Animal1 mean	-0.00439794	0.00488037	0.00656962		0.0107325	-0.030554	0.0323842
	-0.970542	0.240933						Animal2 mean	0.0111626	-0.0344179	0.0361828		-0.013216	0.0180458	0.0223676
								Animal3 mean	0.0253553	-0.0305821	0.039726		0.019674	0.034529	0.0397406
								Animal4 mean	-0.0080294	-0.020333	0.021861		0.022673	-0.0193126	0.0297832
	0.899544	-0.43683		0.998495	-0.0548358			Animal5 mean	0.00751809	0.0591796	0.0596552		-0.0185084	-0.00561725	0.019342
	-0.243455	0.969912		-0.990645	0.136465			Animal6 mean	-0.00953115	0.00763142	0.0122099		0.0149048	0.0950522	0.0962137
								Animal7 mean	0.0661903	0.0185156	0.0687313		0.00820079	0.0571954	0.0577803
	0.898713	-0.438536		0.897384	0.44125
	-0.998263	-0.0589095		-0.948166	-0.317775
	0.99838	0.0569009		0.833734	0.552167
	-0.990252	-0.139287		-0.865621	-0.500699
	0.990291	0.139012		0.801541	0.59794
	-0.870877	-0.4915		-0.69833	-0.715776
	0.393897	0.919155		0.503938	0.86374
	-0.42818	-0.903693		-0.00130087	-0.999999
	-0.383705	0.923456
	0.655605	-0.755104		0.179626	-0.983735
	-0.523781	0.851853		-0.491056	0.871128
	0.624973	-0.780646		0.780918	-0.624633
	-0.768884	0.639388		-0.727178	0.686449
	0.700094	-0.714051		0.992308	-0.123793
	-0.892476	0.451095		-0.896621	-0.442799
				0.730677	0.682724
				-0.604178	-0.796849
				0.847248	0.531198
				-0.578462	-0.815709
				0	1
				0.797416	-0.603429
				-0.980682	0.195609
Animal2	0.813474	-0.581601		0.879228	0.476401
	-0.930257	0.366909		-0.324142	-0.946008
				-0.47763	0.878561
	0.999947	-0.0102975		0.997844	-0.0656307
	-0.940682	-0.339289		-0.852497	-0.522732
	0.983667	0.179997		0.296536	0.955022
	-0.999528	0.0307281		0.363305	-0.93167
				-0.876611	0.4812
	0.969781	-0.243976		0.984357	0.176185
	-0.58991	0.807469
				-0.952351	0.305004
	0.350199	-0.936675		0	1
	-0.320634	0.947203		0.0827967	-0.996566
				-0.432817	0.901482
	0.122827	-0.992428		0.556318	-0.83097
	-0.364011	0.931395		-0.685013	0.728531
	0.832086	-0.554646		0.807798	-0.58946
	-0.989356	0.145514		-0.953584	0.301126
	0.987781	-0.155848		0.999344	0.0362291
	-0.990493	-0.13756		-0.899499	0.436923
	0.927917	0.372786		0.0545145	0.998513
	-0.849457	0.527659		-0.866025	-0.5
	0.705253	-0.708956		0.877468	0.479635
	-0.710799	0.703395		-0.51112	-0.859509
	0.731763	-0.68156		0.0518467	0.998655
	-0.982478	0.186377		-0.553142	-0.833087
	0.905479	0.424392		0.981777	0.190038
	-0.639308	-0.768951		-0.799149	-0.601133
	0.709593	0.704612		0.595553	0.803316
	-0.999951	-0.00986134		-0.671309	-0.741178
	0.998619	0.0525394
	-0.806856	-0.590748
	0.0903689	0.995908		0.404068	0.914729
	0.154721	-0.987958		-0.092131	-0.995747
	0.200437	0.979707		0.208281	0.978069
	-0.0817211	-0.996655		0.0425178	-0.999096
				-0.290624	0.956837
	0	1		0.538493	-0.84263
	0.26518	-0.964199
				0.68635	-0.727271
	-0.5	-0.866025		-0.742784	0.669531
				0.0698253	-0.997559
	0.725768	0.68794
	-0.710494	-0.703703
	0.566856	0.823817
	-0.200437	-0.979707
Animal3	0.724567	0.689205		0.582434	0.812878
	-0.652119	-0.758117		-0.534917	-0.844904
	0.845369	0.534184		0.495612	0.868544
				0.560031	-0.828471
				-0.999987	-0.0050589
	0.768092	0.640339		0.750733	0.660605
	-0.583253	-0.81229		-0.612433	-0.790522
	0	1		0.467044	0.884234
	0.717356	-0.696707		0.0610604	-0.998134
	-0.999142	0.0414143		-0.62816	0.778084
	0.768977	0.639277		0.568116	0.822949
	-0.518171	-0.855277		0.0144621	-0.999895
				-0.163176	0.986597
	0.981246	-0.192758		0.336916	-0.941535
	-0.804974	-0.59331		-0.176987	0.984213
	0.246062	0.969254		0.888675	-0.458539
	-0.163924	-0.986473		-0.999916	-0.0129476
	-0.298866	0.954295
	0.571191	-0.820817		0.438948	0.898512
	-0.979341	0.202218		0.705247	-0.708962
				-0.98362	0.180255
	0.977904	0.209052		0.880109	0.474771
	-0.293672	-0.955906		-0.596937	-0.802288
	-0.709823	0.70438
	0.938185	-0.346134		0.355538	0.934662
	-0.993011	-0.118018		-0.089987	-0.995943
	0.878685	0.477403		0.13663	0.990622
	-0.677067	-0.735922		0.87047	-0.492222
				-0.87047	-0.492222
	0.176033	0.984384		0.26394	0.964539
	0.80218	-0.597082		-0.518487	-0.855085
	-0.970158	-0.242475		-0.130077	0.991504
	0.919344	0.393454		0.939942	-0.341334
	-0.322113	-0.946701		-0.866025	-0.5
	-0.688776	0.724974
	0.981983	0.18897		0.106377	0.994326
	-0.284554	-0.95866		0.79608	-0.605191
	-0.504275	0.863543		-0.844195	-0.536036
				-0.167746	0.98583
	0.99572	0.0924189		0.712319	-0.701856
	-0.328025	-0.944669		-0.999949	0.0101239
	-0.576498	0.817099
	0.9405	-0.339793
	-0.922132	-0.386875
Animal4	0.676063	-0.736844		0.455084	-0.890449
	-0.990339	0.138665		-0.529804	0.84812
				0.988307	0.152477
	0.999837	0.0180399		-0.717313	-0.696752
	-0.970563	-0.240849
				0.158115	0.987421
	0.673959	0.738769		0.158115	-0.987421
	-0.629144	-0.777289		-0.713096	0.701067
				0.750005	-0.661432
	0.910125	0.414333
	-0.847593	-0.530646
	-0.127877	0.99179
				0.0377203	0.999288
	0.487225	-0.873276		-0.175162	-0.98454
	-0.967801	0.251718
				0.439156	-0.898411
	0.993613	0.112838		-0.143084	0.989711
	-0.847503	-0.530791
				-0.917997	-0.396587
	0.250721	0.968059
	0.249311	-0.968424
	-0.716061	0.698038
				0.937224	0.348727
	0.910664	-0.413149		-0.854252	-0.51986
	-0.998574	0.0533844
				0.875513	0.483195
	0.714452	0.699684		-0.952552	-0.304377
	0.0153886	-0.999882
	-0.913575	0.40667
				0.933284	-0.359139
	0.732395	-0.68088		-0.908151	0.418643
	-0.965438	0.260633
				0.989364	-0.145462
	0.820333	0.571887		-0.99069	0.136138
	-0.950032	-0.312152
				0.213579	0.976926
	0.962109	0.272665		0.890265	-0.455443
	-0.983878	-0.178843		-0.875992	-0.482325
				0.178628	0.983917
	0.901433	0.432918		0.786763	-0.617255
	-0.893716	-0.448634		-0.850452	-0.526053
				0	1
	0.706006	0.708206		0.994215	0.107411
	-0.736167	-0.6768		-0.181612	-0.98337
				-0.958174	0.286186
				0.910016	0.414573
	0.884123	0.467254		-0.784844	-0.619693
	-0.291862	-0.956461
				0.388775	0.921333
	0.466286	0.884634		0.821133	-0.570737
	-0.121687	-0.992568		-0.896268	-0.443512
				0.572882	0.819638
	0	1		-0.467454	-0.884017
	0.456142	-0.889907
				0	1
	0.70474	0.709466		0.987941	-0.15483
	-0.0779038	-0.996961		-0.619595	-0.784922
	-0.80639	0.591385
Animal5	0.875815	0.482648		0.434318	0.900759
	-0.964046	-0.265736		-0.44947	-0.893295
	0.73271	-0.680541		0.863805	0.503826
	-0.447403	0.894332		-0.970924	-0.239386
	0.184329	-0.982865		0.997697	0.0678218
	-0.234947	0.972008		-0.506285	-0.862366
				-0.429198	0.90321
	0.374311	-0.927303		0.324216	0.945983
	-0.639295	0.768962		0.017803	-0.999842
				-0.66079	0.750571
	0.884147	-0.467209		0.97717	-0.212458
	-0.441343	0.897338		-0.604778	-0.796394
				-0.217157	0.976137
	0.321033	-0.947068		-0.292735	-0.956194
	-0.17864	0.983915
	0.25428	-0.967131		0.970444	-0.241325
	-0.41658	0.909099		-0.990962	0.134146
	0.655441	-0.755246		0.937146	-0.348936
	-0.980697	-0.195534		-0.995984	0.0895356
	0.334536	0.942383		0.98832	-0.152394
	0.10791	-0.994161		-0.995734	0.0922684
	-0.47362	0.88073
	0.273088	0.961989		0.949201	-0.31467
	0.657326	-0.753606		-0.998269	-0.0588143
	-0.879049	0.476732
	0.9999	0.0141764		0.841948	0.539558
	-0.982541	0.186044		-0.311218	-0.950338
	8.20414e-10	1		-0.542804	0.83986
	0.973646	0.228066		0.997866	-0.0652986
	-0.92668	-0.375852		-0.204633	-0.978839
				-0.852312	0.523034
	0.805333	0.592823		0.930302	0.366794
	-0.983341	-0.181773		-0.837424	-0.546554
	0.997073	0.0764571		0.212532	0.977154
	-0.985757	-0.168173		0.199249	-0.979949
				-0.75566	0.654964
	0.78941	0.613866		0.837886	0.545845
	0.149491	-0.988763		0.406965	-0.913444
	-0.959096	0.283083		-0.947756	0.318995
	0.392765	0.919639		0.952581	0.304285
	0.845102	-0.534605		-0.937369	-0.348339
	-0.805644	-0.5924
	0.0981157	0.995175		0.886247	0.463212
	-0.113877	-0.993495		-0.964574	-0.263813
Animal6	0.546948	0.837166		0.940314	0.340307
	-0.39899	-0.916955		-0.557865	-0.829931
				0.321703	0.946841
	0.33314	0.942877		-0.568699	-0.822545
	-0.115838	-0.993268
				0.239713	0.970844
				0.388513	-0.921443
	0.180229	0.983625		-0.759065	0.651014
	0.213376	-0.97697
	-0.74	0.672607		0.867103	-0.498129
				-0.911337	0.411662
	0.916087	-0.400979
	-0.984258	-0.176738		0.999463	0.0327811
				-0.954139	-0.299363
	0.905456	0.42444
	-0.849494	-0.527598		0.724387	0.689394
				-0.254526	-0.967066
				-0.270689	0.962667
	0.512338	0.858784		0.595522	-0.803339
	0.128398	-0.991723		-0.828616	0.559817
	-0.529434	0.848351
	0.710455	-0.703742		0.79031	-0.612707
	-0.859378	0.51134		-0.569929	0.821694
	0.786305	-0.617838		0.519584	-0.854419
	-0.773677	0.63358		-0.433433	0.901186
	0.997337	0.0729265		0.957969	0.286872
	-0.894509	-0.44705		-0.802721	0.596354
	0.936178	-0.351527		0.687258	-0.726413
	-0.996816	-0.0797379		-0.921941	0.38733
	0.782316	0.622881		0.143032	0.989718
	0.292401	-0.956296
	-0.795695	0.605697
	0.999982	-0.00604407		0.765827	0.643047
	-0.917525	-0.397678		-0.938059	-0.346475
	0.347718	0.937599		0.992676	-0.120805
	-0.269797	-0.962917		-0.780266	0.625448
	-0.350563	0.936539
	0.624076	-0.781363		0.798235	-0.602346
	-0.861741	0.507348		-0.319803	0.947484
	0.375783	0.926708		0.842659	0.538447
	-0.546234	-0.837632		-0.983793	0.179311
	0.787183	0.616719		0.96841	-0.249364
	-0.931398	-0.364002		-0.99828	-0.0586215
	0.958032	0.286662		0	1
	-0.842526	-0.538655		0.328025	-0.944669
				-0.61975	0.784799
	0.85401	0.520256		0.98244	-0.186578
	-0.911123	-0.412135		-0.784038	-0.620713
Animal7	0.999897	-0.0143775		0.999696	-0.0246608
	-0.57374	0.819037
	0.466436	-0.884555		-0.71214	-0.702038
	0.139316	0.990248		0.999717	0.0237977
	0.137707	-0.990473
	0	1		0	1
	0.710629	-0.703567		0.63602	-0.771673
				-0.987381	0.158361
	0.82286	0.568244		0.728611	-0.684928
	-0.99284	0.119455
	0.492134	-0.870519		0.733418	0.679778
				-0.845433	0.534081
	0.826352	0.563155		0.707412	-0.706801
	-0.999971	-0.00757206		-0.83105	0.556198
	0.91967	-0.392693		0.983387	-0.181519
	-0.990681	0.136201		-0.967135	-0.254264
	0.999506	0.0314324		0.0749528	0.997187
				0.780995	-0.624537
				-0.998932	0.0462031
	0.200292	0.979736		0.964219	0.265108
	-0.996091	-0.0883305		-0.442541	-0.896748
	0.104834	-0.99449		0.403461	0.914997
				0.291307	-0.95663
				-0.96851	0.248974
	0.403672	0.914904		0.383485	0.923547
	-0.314801	-0.949158		0.571942	-0.820294
				-0.963229	-0.268682
	0.536586	0.843845		0.790176	0.61288
	-0.314801	-0.949158		-0.948523	0.316709
	0.235656	0.971837		-0.468432	-0.883499
	-0.529787	-0.84813
	0.99993	-0.0118102		0.882506	0.470302
				-0.803191	0.595721
	-0.630823	-0.775927		0.154952	0.987922
				0.516844	-0.85608
				-0.918975	0.394315
	0.984808	0.173648		0.948631	0.316385
	-0.984808	0.173648		-0.0903751	-0.995908
				-0.856834	0.515592
				0.881349	-0.472466
	0.844024	0.536305		-0.693551	0.720407
	-0.684238	0.729259
				0	1
	0.991031	0.133634		-0.73302	-0.680208
	-0.593099	-0.805129
				0.302726	0.953078
	0	1		0.203993	-0.978972
	0.677576	-0.735453		-0.366113	0.93057
	-0.917641	0.397411
	0.99979	-0.0204694
	-0.97771	-0.209958
	0.573542	0.819176
	-0.996109	0.0881325
	0.0785046	-0.996914

## Sheet: Flat 50cm
	HL			FL
	sin	cos		sin	cos
	251	36		252	35
Animal1	0.983665	-0.180007		0.81823	0.574891
	-0.708763	0.705447		-0.971878	-0.235484
	0.188349	-0.982102		0.922683	-0.385559
				-0.618661	0.785658
	0	1		-0.51994	-0.854203
	-0.404506	0.914535
	-0.81648	0.577374		0.184441	-0.982843
	-0.99965	0.0264545		0.978802	-0.204807
	0.435339	-0.900267		0.868338	0.495973
				-0.868338	0.495973
	0.992498	0.122264		-0.752616	-0.65846
	-0.336501	0.941683
	-0.450248	-0.892904		0.991145	-0.132787
				-0.538965	0.842328
	0.902927	0.429795		-0.974096	-0.226135
	-0.830366	0.557218
	-0.605016	-0.796213		0.492575	-0.87027
									HL				FL
									sin	cos	R		sin	cos	R
								Animal1 mean	-0.0534678	0.0841431	0.0996939		-0.0310046	0.00864993	0.0321886
	0.999896	-0.0144436		0.259977	0.965615			Animal2 mean	0.0433	-0.0197005	0.047571		0.0112055	0.0305644	0.0325538
				-0.962615	-0.270872			Animal3 mean	-0.170784	-0.0538523	0.179074		0.103698	-0.000639276	0.1037
								Animal4 mean	-0.0568637	-0.0207542	0.0605328		-0.00173527	-0.00745483	0.00765413
								Animal5 mean	-0.0563277	0.0625037	0.0841399		0.011583	0.0398419	0.0414915
	0	1		0.784139	-0.620586			Animal6 mean	0.00899495	0.0284776	0.0298645		0.0300513	0.0247285	0.0389176
	-0.547893	-0.836549						Animal7 mean	-0.00851366	0.00372597	0.00929329		-0.0144953	0.00252396	0.0147134
	0.420688	0.907205		0.610397	0.792096
	-0.933515	0.358538		-0.991888	-0.127116
	-0.45335	-0.891333		-0.210853	-0.977518
	0.990595	0.136824		0.457153	0.889388
	-0.528338	0.849034		-0.998865	-0.0476344
	-0.109625	-0.993973		0.390272	-0.9207
	0.895586	0.444888		0.682521	0.730866
	-0.396389	0.918083		-0.845986	0.533204
	0.796229	0.604995		-0.0316903	-0.999498
	-0.81823	0.574891
				0.988945	0.148283
	-0.618063	-0.786129		-0.405119	0.914264
	0.619201	-0.785232		-0.62925	-0.777203
	0.291796	0.956481		0.957206	0.289407
	-0.996553	-0.0829581		-0.596068	0.802934
	0.25849	-0.966014		-0.975239	-0.221156
	0.351095	-0.93634		0.420082	-0.907486
	-0.15609	0.987743
	0	1		0.682279	0.731092
	-0.341622	-0.939837		-0.682279	0.731092
Animal2	0	1		0.443532	0.896258
	-0.497193	-0.86764		-0.927434	-0.373987
	0.943763	0.330622		0.943977	-0.330012
	-0.955244	0.29582		-0.277243	0.9608
	0.169843	-0.985471		-0.985323	0.170703
	0.916165	-0.400802		-0.602225	-0.798327
	0.612985	0.790095		0.99653	-0.083235
	-0.942833	0.333265		-0.873563	0.486712
	0.799696	-0.600406		0.495335	-0.868702
	-0.578299	0.815825
	-0.080769	-0.996733		0.332267	0.943185
				-0.738971	-0.673737
	0.74078	0.671747		0.975194	-0.221353
	-0.955	0.296606		-0.329078	0.944303
	0.102043	-0.99478		-0.916872	-0.399181
	0.998998	0.0447487		0.832767	-0.553624
	-0.764881	0.644172		-0.618683	-0.785641
	0.754194	-0.656651		0	1
				-0.53275	-0.846273
	0.302316	0.953208		0.936536	0.350572
	-0.957307	-0.289073		-0.755511	0.655136
	0.556538	-0.830822		-0.638304	-0.769785
	0.999248	-0.0387624		0.845004	-0.534759
	0	1		0.597694	0.801724
	-0.995004	-0.0998311		-0.995548	0.0942561
	-0.40111	-0.91603		0.104272	-0.994549
	0.886564	-0.462606		0.905459	0.424434
	-0.360622	0.932712		-0.271993	0.962299
				0.808345	0.588709
	-0.675668	-0.737206		-0.574772	0.818314
				-0.721128	-0.692802
	0.638822	-0.769355
				0.801906	-0.597451
	0.739399	0.673267
	-0.26278	0.964856
				0.735999	0.676983
	0.55701	-0.830506
				0.526224	0.850346
	0.767567	0.640969		-0.964656	0.263511
	-0.541294	0.840834
				-0.116093	-0.993238
	-0.894308	-0.447452
				0.962503	-0.271271
	-0.108119	-0.994138
Animal3	-0.990647	0.136447		0.834164	0.551516
	-0.999161	-0.0409658		0.551768	0.833998
	-0.963434	-0.267948		0.377095	0.926175
				-0.822984	0.568065
	-0.99281	-0.119704		-0.433884	-0.900969
	-0.969243	-0.246104		0.814576	-0.580057
	-0.803997	-0.594633		0.540641	0.841254
				-0.786053	0.618159
	0.0922684	-0.995734		-0.319302	-0.947653
	0.999853	0.0171351		0.594201	-0.804317
	-0.684547	0.728969
	-0.85101	-0.52515		0.433884	0.900969
	0.915241	0.402906		0.654556	-0.756014
	-0.272952	0.962028
	-0.799617	-0.600511		0.984808	0.173648
	-0.424193	-0.905572		0.493776	0.869589
				-0.917584	-0.397543
	0.233445	-0.97237		0.981125	0.193376
				-0.917267	0.398272
	0.98366	-0.180034		0.222521	-0.974928
	0.789491	0.613763		0.909632	0.415415
	-0.902974	0.429696		-0.989821	-0.142315
				0.96839	-0.249441
				-0.581492	0.813552
	0.894377	-0.447313		-0.496734	-0.867903
	0.250957	0.967998		-0.0213698	-0.999772
	-0.911283	0.411781
	-0.521752	-0.853097		0.857527	-0.51444
	0.881887	-0.471461		-0.667562	0.744554
	0.322654	0.946517		-0.999844	0.0176485
	-0.904126	-0.427265
	0.995618	-0.093515		0.473869	-0.880596
	-0.973695	0.227854
	0.901943	-0.431854		0.999513	0.0312028
	-0.785561	0.618784		-0.083125	0.996539
	0.296979	-0.954884		-0.440394	-0.897805
	-0.101691	0.994816
Animal4	-0.908563	-0.417748		0.197303	-0.980342
	0.789683	-0.613515		0.82608	0.563553
	-0.157312	0.987549		-0.90449	0.426494
	-0.991932	-0.126774		0.0881325	-0.996109
	0.386762	-0.92218		0.998754	0.0498964
				-0.484283	0.874911
	0.290026	0.957019		-0.47188	-0.881663
	-0.995874	0.0907475
	0.245735	-0.969337		0.991199	-0.132382
	0.292472	0.956274		0	1
	-0.999169	0.0407479		-0.624911	-0.780696
	0.0315158	-0.999503		0.937044	-0.349212
	0.936414	0.350898		0	1
	-0.905702	0.423914		-0.991812	-0.127704
	0.0862004	-0.996278		0.685327	-0.728236
	0.805129	0.593099		0.288617	0.957445
	-0.707107	0.707107		-0.998445	-0.055739
	-0.418734	-0.908109		0.465462	-0.885068
	0.839609	-0.543191		0.611792	0.791019
				-0.680095	0.733124
	0.417402	0.908722		-0.603641	-0.797256
	-0.999659	-0.0261247
	0.622831	-0.782357		0.992344	-0.123506
				-0.552482	0.833525
	0	1		0.386443	-0.922313
	-0.0876618	-0.99615
	0.244585	0.969628		0	1
	-0.878255	-0.478192		-0.495921	-0.868368
	0.969993	-0.243132		0.944866	0.327458
	-0.7592	0.650857		-0.993309	0.115485
	0.281364	-0.959601		0.721589	-0.692321
	0.450547	0.892753		0	1
	-0.999948	-0.0101602		-0.660932	-0.750446
	0.265574	-0.96409		-0.898478	-0.439018
	0.859294	0.511481		0.854904	-0.518785
	-0.861437	0.507865
	-0.130612	-0.991434		0.0995678	0.995031
				-0.976744	-0.214411
	0.910219	0.414128		0.934913	-0.354878
	-0.971281	0.237935		-0.749382	0.662138
Animal5	0.51517	0.857088		0.142838	-0.989746
	-0.763856	-0.645387
	0.953263	0.30214		0.48989	0.871784
	-0.998743	0.0501321		-0.990705	0.13603
	0.881144	-0.472848		0.67102	-0.741439
	-0.499415	0.866363		-0.297127	0.954838
	-0.418879	-0.908042		-0.945571	-0.325417
	0.991492	-0.130167		0.667863	-0.744284
	-0.324699	0.945817
	0	1		0.229973	0.973197
	-0.143918	-0.98959		-0.998318	0.0579798
	0.785403	0.618984		0.488484	0.872573
	-0.785403	0.618984		-0.992902	0.118939
	-0.201629	-0.979462		0.25785	-0.966185
	0.997743	0.0671493		0.596746	0.802431
	-0.396223	0.918154		-0.999556	0.0297831
	-0.546991	-0.837139		0.901577	-0.432619
				-0.660548	0.750784
	0.988213	0.153082		-0.477623	-0.878565
	-0.317736	0.948179
	-0.609902	-0.792477		0.913759	-0.406256
				-0.419607	0.907706
	-0.198281	-0.980145		0.973634	-0.228114
				-0.887666	0.460488
	0	1		0.905088	-0.425224
	-0.802296	-0.596926
	0.167506	0.985871		0	1
	-0.878594	-0.47757		-0.681497	-0.731821
	0.973923	-0.226878		0.993463	0.11415
	-0.792857	0.609408		-0.702425	0.711758
	-0.494779	-0.869019		0.587785	-0.809017
	0.584151	0.811645		0.686646	0.726992
	-0.987863	0.155327		-0.988895	0.148618
	0.754476	-0.656328		0.729448	-0.684036
	-0.637314	0.770604
	0.349219	-0.937041		0.353831	-0.935309
	-0.152834	0.988252
	0	1		0	1
	-0.141076	-0.989999		-0.671335	-0.741154
	0.856349	0.516397		0.987091	-0.16016
	-0.942482	0.334256		-0.544584	0.838707
	0.379438	-0.925217		-0.18776	-0.982215
	0.449692	0.893184		0.908388	0.418127
	-0.900849	-0.434132		-0.599107	0.800669
Animal6	0.958402	0.285423		0.643947	0.76507
	-0.970455	0.24128		-0.973016	-0.230739
	0.862558	-0.505958		0.999789	-0.0205587
	-0.744435	0.667695		-0.995134	0.0985287
	0.791552	-0.611101		0.989612	-0.143767
	-0.90267	0.430333		-0.97869	0.205345
	0.938291	-0.345847		0.959185	-0.282778
	-0.963395	0.268085		-0.939402	0.342817
	0.945356	-0.32604		0.991764	-0.128077
	-0.798936	0.601417		-0.992745	0.120235
	0.667698	-0.744432		0.901601	-0.432569
	-0.463637	0.886025		-0.70927	0.704937
	0.318299	-0.94799		0.557979	-0.829855
				-0.571759	0.820421
	0	1		0.30602	-0.952025
	-0.0568042	-0.998385
	0.238483	0.971147		0.878927	-0.476956
	-0.449316	-0.893373		-0.859347	0.511392
	0.72645	-0.687219		0.83882	-0.544409
	-0.685018	0.728526		-0.59508	0.803667
	0.606041	-0.795433		-0.18513	-0.982714
	-0.469596	0.882882
	0	1		0.820324	0.571899
	-0.812463	-0.583013		-0.99482	-0.101655
	0.914971	0.403519		0.723581	0.69024
	-0.979627	-0.200826		-0.930837	-0.365434
	0.992061	0.125757		0.99955	-0.0299844
	-0.878562	0.477628		-0.999935	0.0113748
	-4.10042e-10	-1		0.885091	-0.465419
				-0.492315	0.870417
	0.798229	0.602354		-0.159621	-0.987178
	-0.999583	0.0288819
	0.631701	-0.775212		0.92208	0.386998
				-0.757972	0.652287
	0	1
	-0.393548	-0.919304
	0.687011	0.726647		0.311363	-0.950291
	0.284694	0.958619		0.572098	0.820185
	-0.88712	-0.461539		-0.951609	0.307313
	0.692502	-0.721416		0.606669	-0.794954
	0.666374	0.745617		0	1
	-0.914707	-0.404118		-0.434922	-0.900468
				0.997094	-0.0761784
				-0.211888	0.977294
Animal7	0.926759	0.375658		0.528659	-0.848834
	-0.436696	0.899609
	-0.223426	-0.974721		0	1
				-0.609977	-0.792419
	0.689516	0.72427		0.962472	0.27138
	-0.941386	-0.33733
	0.151242	-0.988497		0	1
				-0.469284	-0.883047
	0.173172	0.984892		-0.60014	-0.799895
	-0.324699	-0.945817
	0.676851	0.73612		0.838893	-0.544297
	-0.597549	-0.801833
	0.99379	0.111273		0	1
	-0.587435	0.809271		-0.675113	-0.737715
	8.20414e-10	1		0.875661	0.482926
				-0.973157	0.230141
	0.79041	-0.612578		0.553157	-0.833077
	-0.545535	-0.838088		0.832751	0.553648
				-0.875861	0.482563
	0.999861	0.016698		0.123479	-0.992347
	-0.771817	0.635844
	-0.988426	-0.151705		0.46776	0.883856
				-0.407601	-0.91316
	0.939568	-0.342361		0.840278	0.542157
	-0.968551	0.248816		-0.804701	0.59368
	0.987758	0.155992		0.168939	-0.985627
	-0.754416	0.656397
	-0.0843395	-0.996437		0.641585	0.767052
				-0.980294	-0.197542
	0.834263	-0.551367		0.98454	0.175159
	-0.962489	0.271322		-0.860214	0.509933
	0.131542	-0.991311		0.678358	-0.734732
				-0.383112	0.923702
				-0.999233	-0.0391511
	0	1
	-0.655605	-0.755104
				0.239677	-0.970853
	0.99975	-0.0223741
	-0.452794	0.891615
				0.725889	0.687812
	0.400185	0.916434		-0.99855	-0.0538298
	-0.998558	-0.0536766
				0.739974	-0.672636
	0.318104	-0.948056
				0.40563	0.914037
				-0.99897	0.0453831
				0.87122	-0.490892
				-0.45101	0.892519
				-0.928029	-0.372508
