# Supplementary material for: Absent phasing of respiratory and locomotor rhythms in running mice
Source: eLife. 2020 Dec 1;9:e61919. doi: 10.7554/eLife.61919 (PMC7707822; doi:10.7554/eLife.61919)
Supplement: Figure 4—source data 1. [file elife-61919-fig4-data1.xlsx]

## Sheet: air-puff Trot
	HL			FL
	sin	cos		sin	cos
	96	27		90	23
Animal1	0.887391	0.461018		0.141841	-0.98989
	-0.998524	0.054309
	0.40443	-0.914569		0.77494	0.632034
				-0.591128	0.806578
	0	1		0.882663	0.470006
	-0.606386	-0.79517		-0.997139	-0.0755924
	0.906076	0.423115		0.920619	0.390463
	-0.843057	-0.537825		-0.99915	-0.0412264
	0.789106	0.614258		0.71432	-0.69982
	-0.994936	-0.100508
	0.940881	-0.338738		0	1
				-0.724005	-0.689794
	0	1		0.962907	0.269835
	-0.355426	-0.934704		-0.832294	0.554335
	0.921699	-0.387905		0.986282	0.165069
				-0.485228	0.874387
									HL				HL
									sin	cos	R		sin	cos	R
	0	1		0.133504	-0.991048			Animal1 mean	0.117061	0.0263442	0.119989		0.00311916	0.0246601	0.0248566
	-0.743595	-0.66863						Animal2 mean	0.0358325	-0.018706	0.0404213		0.0495423	-0.0527021	0.0723322
								Animal3 mean	-0.0377086	0.144395	0.149238		-0.0234188	-0.182611	0.184106
								Animal4 mean	0.118226	0.389494	0.407042		-0.136192	-0.162245	0.211829
	0.985763	-0.168139		0.466493	-0.884525
	8.20414e-10	1		-0.26544	0.964127
	0.30211	-0.953273		-0.236839	-0.971549
	-0.246672	0.969099
	0.916238	-0.400636		0.424193	0.905572
	-0.789602	0.613619		-0.999687	-0.02503
	0.651372	-0.758758		-0.999417	0.0341411
	-0.665973	0.745976
	0.979937	-0.199306		-0.194385	-0.980925
	0.836866	0.547408		0.988691	-0.149967
	-0.996516	-0.0834005
	0.879474	-0.475947
Animal2	0.296188	-0.95513		0.742149	0.670235
				-0.952085	0.305834
	0.478585	0.878041		0.96836	-0.249556
	-0.908913	-0.416986		-0.940056	-0.34102
	0.951469	0.307744		0.672745	0.739875
	-0.90477	-0.4259		-0.302642	-0.953104
	0.855654	0.517548		-0.0282649	-0.9996
	-0.579934	-0.814663
	0.701045	0.713117		0.996484	-0.0837847
	-0.604236	-0.796805		-0.859441	0.511235
	0.705589	0.708621		0.54871	-0.836013
	-0.859766	0.510689
	0.348316	-0.937377		0.636113	0.771596
				-0.988345	-0.152234
	0.7549	0.65584		-0.267743	-0.96349
	-0.976709	-0.21457
	0.587033	-0.809563		0.348958	0.937138
				-0.840435	-0.541912
	0.56711	0.823642		0.999809	-0.0195332
	-0.999999	-0.00100499		-0.524016	0.851708
	-0.946357	-0.323123		-0.304531	-0.952502
	0.992276	0.124047		0.972318	0.233662
	-0.930437	0.366453
	0.32101	-0.947076		0.450419	-0.892818
	0.727714	-0.685881		0.480473	0.877009
	-0.182071	0.983285		-0.199463	-0.979905
	-0.168187	-0.985755		0.753436	0.657521
				-0.96839	0.249441
	0.962345	0.27183		-0.0773282	-0.997006
	-0.256211	0.966621
				0.939956	0.341295
				-0.91955	0.392973
Animal3	0.543914	-0.839141		0.491326	-0.870976
	0.292414	0.956292		0.950809	0.309778
	-0.876383	-0.481615		-1	-0.00099987
	0.0990196	0.995085		0.91604	-0.401086
	-0.570809	-0.821083		-0.789277	0.614038
	0.99675	-0.0805589		0.221109	-0.975249
	-0.41113	0.911577
	-0.189819	-0.981819		-0.88485	-0.465875
	0.987224	0.159337		-0.0524232	-0.998625
	0.233225	0.972423		-0.374654	-0.927165
	-0.458958	0.888458
	0.392043	0.919947		0.550559	-0.834796
	-0.841812	0.539771
	-0.579021	-0.815313		0.996674	-0.0814925
	-0.204185	-0.978932		0	1
				-0.996882	0.0789109
	0.993744	-0.111681		0	1
	-0.832301	0.554323		0.0668738	-0.997761
	0	1		0.102312	0.994752
	-0.426275	-0.904594		-0.721914	-0.691982
	0.846768	0.531963		0.97438	0.224909
	-0.786288	0.61786		-0.895041	-0.445985
Animal4	0.999997	-0.00252134		0.618821	0.785532
	0.999999	-0.00159796		0	1
	-0.190582	0.981671		-0.999847	-0.0174913
	-0.645928	0.763398		-0.106342	-0.99433
	0.934077	-0.357071		0.073066	0.997327
	-0.233088	0.972456		-0.999275	-0.0380799
	0.491228	-0.871031		0.136412	-0.990652
	0.382286	0.924044		0	1
	-0.701611	0.71256		-0.954079	0.299554
	0.882194	0.470887		-0.306684	-0.951811
	0.724909	0.688845		0.964131	-0.265427
	-0.53984	0.841767
	-0.992175	-0.124852		-0.111289	-0.993788
	-0.522499	-0.85264		0.879604	-0.475706
	0.904064	0.427397		0.825258	0.564756
	-0.758406	0.651783		-0.836866	-0.547408
	0.843502	-0.537126		-0.990261	-0.13922
	0.656848	0.754023		-0.999327	0.0366926
	0.72504	0.688707		-0.929939	-0.367714
	-0.573766	0.819019
	0	1		-0.248453	-0.968644
	-0.785267	0.619157
				0.191825	-0.981429
				0.933219	-0.359308

## Sheet: air-puff Gallop
	HL			FL
	sin	cos		sin	cos
	232	37		240	32
Animal1	0.482963	0.875641		-0.595926	-0.80304
	-0.905414	0.424529
	0.98192	0.189294		-0.702743	0.711443
	-0.997925	0.064391
	0.789005	-0.614387		0.614213	0.789141
	-0.736621	0.676306		-0.315485	-1.85434
	-0.0376765	-0.99929		0.502219	-0.86474
	0.819152	0.573576
	-0.925159	0.37958
	-0.298051	-0.95455		0.214606	-0.976701
	0.877593	-0.479406		0.930557	0.366148
				-0.94124	0.337738
				0.149819	0.988713
				0.55223	-0.833692
				-0.99425	0.107082
	0.333449	0.942768							HL				HL
	-0.876453	0.481488							sin	cos	R		sin	cos	R
								Animal1 mean	-0.0021975	0.185564	0.185577		-0.000541938	-0.0516841	0.0516869
								Animal2 mean	0.0130626	-0.0598595	0.0612682		-0.0615494	0.108979	0.125159
	0.706618	0.707595		0.0657451	0.997836			Animal3 mean	0.10726	-0.134527	0.172053		-0.0408748	-0.0528021	0.0667743
	-0.967516	0.252809		-0.875195	0.48377			Animal4 mean	0.0557944	0.187059	0.195202		0.0232053	0.023599	0.0330968
								Animal5 mean	-0.115902	-0.139155	0.1811		0.10945	0.0527603	0.121503
								Animal6 mean	0.0341768	-0.0786119	0.0857198		-0.0349431	0.128872	0.133525
	-0.320122	0.947376		0.85691	-0.515465			Animal7 mean	-0.079677	-0.0533425	0.0958845		0.134175	0.119082	0.179398
	0.958448	0.285268		-0.902549	-0.430588
	-0.323892	0.946094
	-0.185377	-0.982668		-0.995287	-0.0969755
	0.173907	-0.984762		-0.256002	0.966676
				0.985343	0.170585
				0.561245	-0.82765
	0.995175	0.0981207		-0.76593	-0.642924
	0.551562	0.834134		0.0403521	-0.999186
	-0.935955	0.352121
	-0.44566	-0.895202		0.999994	-0.00351408
	0.285076	0.958505
	-0.52658	0.850126
	0.330537	0.943793		-0.114776	-0.993391
	-0.694822	-0.719182
	0.999499	-0.0316584		0.980986	0.194078
	-0.401364	0.915919		-0.541482	0.840712
	0.958289	-0.2858		0.984301	0.176497
	8.20414e-10	1		8.20414e-10	1
	0	1		-0.992024	-0.12605
	-0.999142	0.0414088		0.994771	0.102134
	0.341438	-0.939904		-0.587785	-0.809017
	0.0889154	0.996039		-0.818574	0.574401
	-0.177126	-0.984188		0.948616	0.316431
Animal2	0.776655	-0.629926		0.371072	-0.928604
	0.619372	0.785098		-0.963109	0.269111
	-0.67958	0.733602
	-0.169138	-0.985592		-0.0895307	-0.995984
				-0.121775	0.992558
	0.712591	0.70158		0.241508	0.970399
	-0.862544	-0.505982		-0.639128	-0.769101
	0.234825	-0.972038		0.691014	-0.722842
				-0.391967	0.919979
	0.672441	0.740151		0.38595	-0.92252
	-0.472702	-0.881222		-0.219892	0.975524
	-0.49473	-0.869047		0.988296	-0.152551
				-0.769614	0.638509
	0.403274	-0.915079		0.285403	0.958408
				-0.87888	-0.477043
	0.495459	-0.868632		0.793285	0.608851
				-0.92323	0.384248
	0.142694	0.989767		0.0330634	0.999453
	-0.25407	-0.967186		-0.738915	-0.673798
	0.0706976	-0.997498		-0.409402	-0.912354
	0.984502	0.175375		0.432191	0.901782
	-0.860715	0.509087		-0.803574	0.595204
	-0.338662	-0.940908		0	1
				-0.876668	-0.481095
	0.52078	0.853691		0.950373	-0.311113
	-0.215784	-0.976441		-0.931791	0.362994
	0	1		0.693328	-0.720622
	-0.991543	0.129776
	0.999808	-0.0195847		0.871193	-0.49094
				-0.0750273	0.997181
	0.309017	0.951057		-0.45101	-0.892519
	-0.96969	0.24434
	0.286132	-0.95819		0.830717	0.556696
				-0.918613	0.395159
	0.541074	0.840975
	-0.983126	0.182931
	0.119831	0.992794		0.0569738	0.998376
	-0.757397	0.652954		-0.845277	-0.534329
	-0.951584	-0.307388		0.758514	-0.651657
	0.832828	-0.553532		0.801017	0.598641
	-0.521466	0.853272		-0.970804	0.239875
	-0.588652	-0.808387
	0.795575	-0.605855
	0.97605	0.217546
	-0.942187	0.335089
	0.859322	-0.511435		0.984355	-0.176194
				-0.606451	0.795121
	0.069125	-0.997608		0.929566	0.368657
	0.154022	0.988067		-0.935136	-0.354288
Animal3	0.251978	-0.967733		-0.383314	-0.923618
	0.530986	0.847381		0.911333	0.411669
	-0.909275	-0.416195		-0.347134	0.937815
	0.205944	-0.978564		0.925935	-0.377683
	0.999724	0.0235064		-0.647013	-0.762479
	-0.815639	-0.578561		0.74445	0.667678
				-0.681195	-0.732102
	0.746921	-0.664913		0.637581	0.770384
	-0.797214	0.603697		-0.893379	0.449304
				-0.506834	-0.862044
	0.486945	-0.873433		-0.145455	-0.989365
	0.266098	0.963946		0.954253	0.298999
	0.134265	-0.990946		-0.940836	0.338862
	0.793541	0.608517		-0.632605	-0.774475
	-0.728125	-0.685445
	0.926375	0.376602		0.791132	-0.611645
	-0.808203	0.588904
	0.0256312	-0.999671		0.294512	0.955648
				-0.681662	-0.731667
				-0.936807	-0.349848
				0.849565	0.527483
	0.373965	-0.927443		0.787917	0.615782
				0.407155	-0.913359
	0.433884	0.900969		0.283641	0.958931
	-0.996095	0.0882847		-0.997069	0.0765112
	0.129218	-0.991616
	0.988058	0.154083		-0.620627	0.784106
	-0.124625	0.992204		-0.282489	0.959271
	0.427497	-0.904017		0.412024	-0.911173
	0.895597	0.444866		0.456018	0.889971
	-0.983944	-0.178479		-0.890662	0.454666
	-0.0364835	-0.999334		-0.88147	-0.472241
	0.993959	0.109748		0.726681	-0.686975
	-0.210213	0.977656
	0.967647	0.252306		-0.98566	-0.168745
	-0.72318	0.69066
	-0.696461	-0.717595		-0.907494	-0.420065
	0.373954	-0.927447		-0.489807	-0.871831
				0.957294	-0.289115
	0.930414	-0.366511
	0.940872	-0.338761		0.223165	-0.974781
	-0.984126	0.177469
	0.775975	-0.630764		0.780325	0.625374
				-0.528964	0.848644
	0.257075	0.966392		-0.375527	-0.926811
	-0.574562	-0.818461
	-4.10207e-10	-1		-0.50757	-0.861611
	0.961575	0.274542		0.776836	-0.629703
	-0.221872	0.975076
	-0.703157	-0.711035		0.875163	0.483828
				-0.24815	0.968722
Animal4	0.707741	-0.706472		0.842599	0.538541
				-0.68412	0.729369
	0.250598	0.968091		-0.18212	-0.983276
	-0.980311	0.197462
	0.4913	-0.87099		0.967752	0.251903
				-0.829677	0.558244
	0.904544	0.426381		0.863085	0.505058
				-0.9921	0.125449
	0.356557	0.934274		-0.212479	-0.977166
	-0.677732	0.735309
	-0.97744	0.211215		0.885779	-0.464107
	0.921024	0.389505		0.56317	0.826341
	-0.466843	0.88434		-0.232195	-0.972669
				-0.117845	0.993032
	0.0996342	0.995024		0.707614	0.706599
	0.248372	0.968665		-0.937881	0.346958
				-0.873514	-0.486799
	0.418879	-0.908042		0.830839	0.556514
	0.796876	-0.604144		0.284246	0.958751
				-0.790621	0.612306
	0.135831	-0.990732		0.0105954	-0.999944
	-0.565413	-0.824808		0.398977	0.916961
				-0.97372	0.227751
	-0.0529978	-0.998595		0.473444	-0.880824
	0.730836	0.682553		0.999033	-0.043972
				-0.995692	0.0927264
	0.533615	0.845728		0.102525	-0.99473
	0.0795219	0.996833		0.731455	-0.681889
	-0.756933	0.653492
	-0.986731	-0.162366
	0.144647	0.989483		-0.996584	-0.0825793
	0.331908	-0.943312		0.845383	-0.53416
	8.20414e-10	1
	0.612014	0.790847		0.999966	-0.00828907
	-0.793048	-0.609159		-0.991758	-0.128129
Animal5	0.0262316	-0.999656		0.951996	0.306111
				-0.358309	0.933603
	0.348572	0.937282		0.963242	-0.268635
	-0.416281	-0.909236		-0.846935	-0.531696
	0.0369081	0.999319		0.533721	-0.845661
	-0.841707	-0.539935
	-0.782656	-0.622454		0.971032	0.238948
	0.102821	0.9947		0.791381	0.611323
	-0.965071	-0.261988		-0.145643	-0.989337
				-0.633216	0.773975
	0.692076	0.721825		0.401695	-0.915773
	-0.991137	0.132843
				0.95323	-0.302244
				-0.656407	0.754407
	0.799303	-0.600928		-0.985335	-0.170628
	0.935501	0.353325		0.469599	-0.88288
	-0.0710972	0.997469
	-0.30473	-0.952439		0.783817	0.620992
				8.20414e-10	1
	0.615721	0.787964		0.61638	-0.787449
	-0.37032	-0.928904		-0.626126	0.779722
	0.304629	0.952471		0.768713	-0.639594
	-0.99605	-0.0887959		-0.895855	0.444346
	-0.0245796	-0.999698		0.959825	-0.2806
	-0.926445	0.376429		-0.936743	0.350017
	0.235715	-0.971822		0.522244	0.852796
				-0.862016	-0.506881
	0.658393	0.752674		0.987944	-0.154809
	-0.922992	-0.384818
	-0.605406	-0.795917		0.268566	0.963261
				-0.999107	0.0422428
	0.0962678	-0.995355		0.690854	-0.722994
				-0.514509	0.857485
	-0.38036	-0.924839
	0.617342	-0.786695
Animal6	0.431743	0.901997		0	1
	-0.57309	-0.819492		-0.831064	0.556177
	0.997442	0.0714802		-0.787407	-0.616433
	-0.197759	0.980251
	-0.922744	-0.385414		0.837912	-0.545806
	0.570032	-0.821622		0.707107	0.707107
				-0.610244	0.792214
	-0.878472	-0.477794		0.753224	0.657764
				-0.380803	0.924656
	0.0593649	-0.998236		-0.892926	-0.450204
	0.871224	-0.490885		0.103179	-0.994663
	0.86549	0.500926		-0.248932	-0.968521
	-0.562057	0.827099
	-0.683569	-0.729886		0.440648	0.89768
				-0.607484	0.794332
	0.847375	-0.530995		-0.73366	-0.679517
	0.448799	0.893633		0.92039	-0.391002
	-0.626733	-0.779234		-0.370986	0.928639
	-0.712317	-0.701858		0.725167	-0.688573
				-0.521729	0.853112
	0.932189	0.361971		-0.528802	-0.848745
	0.522499	0.85264		0.352967	-0.935636
	-0.338738	0.940881
	-0.965181	-0.261585		0.887511	0.460787
				-0.812487	0.582979
	0.94531	-0.326174		0.972984	0.230873
				-0.477138	0.878828
	0.27797	0.96059		-0.521824	-0.853053
	-0.996407	-0.0846898
	-0.140761	-0.990044		0.932439	-0.361327
	0.68508	-0.728468		0.511582	0.859235
				-0.99996	0.00895029
	0.853404	0.52125		0.60042	0.799685
	-0.873091	0.487557		-0.864713	-0.502266
	-0.601624	-0.798779		0.958138	-0.286307
	0.75575	-0.654861		0.21821	0.975902
				-0.884841	0.465893
Animal7	0.625086	-0.780556		0.130797	0.991409
	-0.198947	0.98001		-0.977368	-0.211546
	-0.208254	-0.978075		0.725526	-0.688195
	0.22745	-0.97379		0.206386	0.978471
				-0.827387	-0.561632
	-0.344199	-0.938897		0.78264	0.622475
				8.20414e-10	1
	-0.890008	-0.455945		0.203631	-0.979048
	0.667025	-0.745036		0.712606	0.701565
				-0.712606	0.701565
	-0.91965	0.392738		0.997174	0.0751268
	-0.169505	-0.985529		0.827096	0.56206
	-0.225156	0.974323		-0.81438	0.580332
	0	1		0.424056	-0.905636
	0.163973	-0.986465		0.876797	-0.480861
	0.896016	-0.444021		0.453587	0.891212
				-0.99704	0.0768795
	0.0794502	0.996839		-0.486132	-0.873886
	-0.803241	0.595654
	-0.522562	-0.852601		0.844143	-0.536119
				0.936511	0.350638
	-0.571352	0.820705		0.420991	0.907065
				-0.849944	0.526873
	0.026848	-0.99964		-0.996666	-0.0815906
	0.991296	0.131655		0.337523	0.941317
	-0.808124	0.589012		-0.973649	-0.22805
	-0.848586	-0.529057		0.632873	-0.774256
	0.0698975	-0.997554		0.951465	0.307757
	0.802123	0.597159		0.953373	0.301794
	-0.618713	0.785617		-0.664577	-0.74722
	0.711732	-0.702451		0.999198	-0.0400499
	-0.606735	0.794905
	-0.995517	0.0945798		0.999764	0.0217326
	0.699387	-0.714743		0.768826	0.639458
				-0.673434	0.739247
	0.642788	0.766044		-0.649811	-0.760095
	-0.262831	0.964842

## Sheet: Mean loco speed Trot and Gallop
Average limb cycle frequency for each animals
	Trot	Gallop
Animal 1	72.4907	99.1928
Animal 2	63.6364	93.3599
Animal 3	68.5249	105.162
Animal 4	83.6307	107.331
Animal 5		80.0628
Animal 6		90.7292
Animal 7		110.726
Mean	72.0707	98.0805
St Dev	8.51508	10.7845
individual limb cycle frequencies for each animals
	Mean speed
	Trot	Gallop
Animal 1	78.0872	100.146
	52.7465	119.81
	63.0823	100.033
	58.4491	111.769
	70.4621	95.4414
	88.9759	78.2483
	95.6318	88.1051
		99.9903
Animal 2	50.1762	105.817
	72.7664	93.2082
	66.428	101.396
	56.6968	99.4606
	72.1146	84.8601
		98.2707
		82.768
		92.3083
		82.1494
Animal 3	58.6234	94.03
	53.1993	103.949
	81.9023	98.5998
	94.9188	133.451
	72.21	95.7798
	50.2956
Animal 4	92.5852	106.8
	79.52	104.839
	91.8703	110.763
	61.4045	118.202
	78.0294	99.4433
	95.2548	105.16
	86.7506	106.108
Animal 5		62.2113
		61.4811
		102.13
		87.1663
		63.412
		80.5328
		86.843
		96.7256
Animal 6		100.275
		77.4571
		92.1959
		82.1235
		92.5117
		99.8115
Animal 7		126.312
		145.652
		70.5015
		118.563
		119.165
		120.129
		97.6928
		110.402
		120.827
		98.9938
		89.7498
