# Supplementary material for: Absent phasing of respiratory and locomotor rhythms in running mice
Source: eLife. 2020 Dec 1;9:e61919. doi: 10.7554/eLife.61919 (PMC7707822; doi:10.7554/eLife.61919)
Supplement: Figure 4—source data 3. [file elife-61919-fig4-data3.xlsx]

## Sheet: Rest Frequency
Trot 50cm/s (Treadmill)		Trot Air-Puff		Gallop Air-puff			Recap for making the graph	Treadmill	Air-puff	Air-puff
								Trot 50cm/s	Trot	Gallop
Average frequencies for each animal (bursts/sec)
Animal 1	9.20924	Animal 1	11.1835	Animal 1	13.9391		Animal 1	9.20924	11.1835	13.9391
Animal 2	9.30773	Animal 2	11.7435	Animal 2	15.9133		Animal 2	9.30773	11.7435	15.9133
Animal 3	10.694	Animal 3	11.8751	Animal 3	14.2225		Animal 3	10.694	11.8751	14.2225
Animal 4	10.7421	Animal 4	11.8091	Animal 4	14.2496		Animal 4	10.7421	11.8091	14.2496
Animal 5	10.0292			Animal 5	15.5184		Animal 5	10.0292		15.5184
Animal 6	11.2532			Animal 6	13.2002		Animal 6	11.2532		13.2002
Animal 7	10.7635			Animal 7	16.6275		Animal 7	10.7635		16.6275
Mean	10.2856	Mean	11.6528	Mean	14.8101		Mean	10.2856	11.6528	14.8101
St Dev	0.78744	St Dev	0.317441	St Dev	1.22688		St Dev	0.78744	0.317441	1.22688
Individual of instantaneous frequencies for each animal
Animal 1	9.9404	Animal 1	11.9333	Animal 1	13.5867
	8.66548		11.6008		14.1436
	7.71015		10.4275		16.6115
	9.09915		10.4824		17.094
	10.2987		10.5706		15.748
	8.71073		13.1064		13.9468
	8.5984		11.8904		15.0151
	8.21026		10.9411		14.0451
	9.08268		10.2564		15.8982
	7.9808		10.6496		12.255
	10.7297		12.6739		14.0845
	7.96169		12.7719		13.6796
	8.96861		11.6549		13.1417
	8.72588		10		16.1027
	7.71607		10.111		14.8148
	9.96012		8.16327		10.02
	9.70872		12.8863		12.1212
	11.2488		11.4552		13.6986
	8.96045		10.4268		14.8363
	10.5484		10.7762		13.1403
	11.1859		11.8343		12.5
	9.46082		11.2231		12.21
	8.88888		12.4224		11.9048
	8.63553		13.3156	Animal 2	17.3008
	10.5934		11.0375		19.3055
	8.26447		14.43		17.271
	7.86144		11.4548		15.823
	9.03351		9.61539		16.9492
	8.90464		10.6496		17.0354
	8.43881		12.5157		15.823
	8.44607		12.5785		15.8986
	10.0906		12.8042		14.3466
	8.34747		12.7226		16.5289
	9.55117		11.1235		14.557
	10.1935		10.8932		13.1242
	11.976		11.8483		16.5825
	8.70334		12.1511		15.1976
	9.52378		10.2985		17.7307
	8.34012		10.3418		14.5985
	9.31995		9.25926		12.6423
	8.46729		8.31927		13.9468
	8.5616		13.3695		17.8896
	9.92056		11.876		12.8695
	9.01724		13.2272		17.3606
	8.09717		10.582		17.7304
	9.6154		14.3675		13.7553
	8.8575		11.2241		15.4082
	9.81332		10.7753		19.5301
	8.32656		12.2254		15.1749
	10.111		14.2238		15.4795
	10.2989	Animal 2	12.6582		12.9371
Animal 2	8.49623		11.8486		16.1545
	9.12412		12.9202		14.4087
	11.0252		14.0845		29.2404
	7.15314		12.0624		13.6243
	10.4057		12.1506		13.6054
	9.53303		11.4286		15.8225
	9.44284		14.7491		14.0059
	10.0704		11.7782		15.6012
	8.75663		8.75663		13.5314
	8.71074	Animal 3	12.723	Animal 3	18.6916
	12.7713		12.6264		14.0451
	8.79513		13.9274		14.0251
	8.55444		10.7293		12.5472
	9.88149		11.3768		10.5484
	9.64292		9.88188		13.1579
	9.51496		10.8807		15.0376
	11.5471		12.2558		12.6426
	9.96031		10.846		13.0035
	9.7561		12.1654		11.0741
	9.02521		12.0773		12.24
	8.40336		12.0336		13.245
	7.73998		11.5875		11.8915
	9.12394		10.9772		10.6836
	9.56044		13.8693		17.3913
	9.02521		11.5341		13.1228
	8.89692		11.4413		12.0335
	8.67296		13.298		12.4695
	8.45303		10.9768		20.2837
	9.63384		12.8537		14.2857
	10.4931		11.6549		12.4224
	10.0302		10.3413		18.1162
	9.01725		10.929		16.5289
	7.83689		8.98466		12.987
	8.70334		10.6268		20.9202
	7.50183		9.83292		19.3047
	9.10741		12.8527		15.48
	8.11051		11.7238		13.1235
	10.02		10.9048		11.7788
	9.69		12.8863		15.5274
	7.63359		10.4277		13.4957
	8.02558		10.7989		12.8701
	8.31251		10.8108		14.6202
	10.1627	Animal 4	11.1732		13.245
	8.57621		13.2801		14.9472
	10.4061		11.1484	Animal 4	13.4228
	9.94021		9.5147		18.5871
	9.50577		11.8765		15.748
	12.1505		11.8483		14.3885
	8.89693		9.58784		14.0251
	8.94448		10.7758		12.1656
	10.3627		8.06451		13.1932
	10.0907		10.5263		12.0188
	9.8522		11.8771		15.976
	7.57017		11.848		13.35
Animal 3	10.3201		12.3761		14.9028
	7.96813		10.7527		12.3302
	9.14057		12.8695		10.6498
	7.48516		10.6048		15.1282
	7.84916		11.5201		9.74644
	10.9173		10.8227		15.9482
	12.3		10.8456		13.0719
	10.1728		11.5743		19.533
	9.00078		12.987		12.987
	8.98498		11.7923		12.5147
	9.00902		11.7507		13.1067
	10		12.6426		14.2857
	9.99998		11.1859		12.5941
	9.3718		10.5043		15.5283
	9.10773				14.4307
	7.8125				11.2736
	10.582				13.7738
	9.46048				19.7622
	9.14938				17.1237
	9.02522				15.9224
	9.60598			Animal 5	20.8332
	10.2355				17.793
	8.07112				17.2123
	9.53269				22.988
	12.2102				15.0153
	9.3983				16.8068
	10.8696				15.6982
	11.4552				16.3656
	11.1358				16.2883
	8.96861				15.552
	11.5341				16.5016
	10.6154				16.4746
	10.6048				12.5464
	11.6005				13.0381
	12.1511				12.9033
	12.3456				13.5868
	9.85222				11.9189
	10.5039				12.4997
	12.4848				15.1511
	10.9768				12.9364
	10.4824				14.9489
	9.08251				14.3468
	11.4026			Animal 6	13.351
	10.4931				11.3251
	13.1932				14.0057
	11.7782				12.4068
	12.5472				14.5984
	11.9048				12.7875
	13.0893				11.8344
	13.2973				12.3612
	11.1859				15.384
	10.6724				14.3475
	10.3414				13.1916
	14.9918				12.7888
	13.6432				14.1837
	13.1748				13.055
	13.4228				13.5496
	12.1656				13.2102
	12.27				12.2549
Animal 4	8.82606				13.0381
	9.46081				12.594
	9.08268				13.7363
	9.3371			Animal 7	20.4496
	9.14073				16.8921
	9.90099				17.3611
	8.68046				16.6666
	9.28512				14.3472
	11.8763				17.2118
	12.407				15.7231
	11.8343				15.0831
	12.24				18.3151
	10.0805				10.6043
	15.0833				18.6566
	12.5944				20.4083
	14.0447				15.9494
	12.255				16.9202
	12.0338				16.6388
	14.7274				18.3151
	9.62478				16.9491
	12.4842				18.6222
	11.1986				16.5563
	10.2985				18.3151
	9.87159				16.9491
	11.7372				18.6222
	9.37214				16.5563
	10.0502				15.528
	7.20458				14.4504
	9.63381				11.4418
	10.1523				15.4085
	9.23357
	8.58367
	8.76443
	8.74109
	10.3845
	8.47457
	10.5039
	9.73717
	12.6258
	10.1939
	10.6724
	12.2248
	10.0601
	10.2147
	10.6836
	11.7929
	11.1232
	11.2741
	11.8201
	9.37214
	14.0451
	11.2865
	9.09092
	13.316
	11.9615
	11.4547
	10.8461
	10.1318
	10.6498
Animal 5	9.74663
	9.24221
	8.1037
	9.11566
	9.31978
	10.2879
	6.99799
	11.6279
	8.41745
	8.69566
	10.7992
	7.86157
	11.0621
	9.53284
	8.23721
	11.4416
	11.2234
	9.87157
	10.7527
	10.173
	10.5263
	8.84956
	9.737
	11.6823
	9.80393
	7.95549
	12.4532
	8.93668
	13.6424
	11.5206
	8.74885
	9.89144
	10.6494
	8.45303
	12.9706
	9.88147
	8.70304
	11.161
	12.0188
	11.7788
	11.1981
	9.43397
	9.60636
	9.69916
	10.0503
	10.2041
	10.4383
	10.2147
	10.2355
	8.62069
	10.4712
	9.38071
	8.06453
	12.5159
	9.72756
	9.90098
Animal 6	11.8766
	10.9772
	14.684
	11.7923
	10.1729
	11.6825
	12.6902
	10.3093
	10.8227
	10.9406
	11.8343
	10.0601
	12.8205
	11.2994
	12.723
	13.5867
	12.7066
	13.4588
	12.1951
	10.3414
	10.4819
	11.8623
	11.0008
	8.56904
	10.1214
	11.9336
	10.111
	11.9475
	11.2994
	10.3842
	11.6279
	11.7098
	10.1834
	13.7546
	10.582
	10.7527
	9.76575
	10.1523
	11.2865
	10.6725
	10.7527
	12.5153
	9.42528
	12.1212
	11.8059
	12.1951
	10.3627
	9.99025
	11.6687
	11.7367
	10.4061
	9.90099
	9.25926
	13.9662
	10.3093
	10.8341
	9.65273
	10.4494
	11.0617
	10.9411
	11.9186
Animal 7	9.84237
	11.3768
	10.582
	9.9402
	9.68998
	8.68061
	9.85224
	9.34578
	10.7644
	11.976
	11.5077
	11.7093
	11.4552
	11.0861
	11.0621
	9.98011
	9.48748
	10.6498
	13.1061
	10.6158
	11.0619
	10.4821
	10.5043
	9.7751
	10.5263
	12.1358
	12.4535
	10.6952
	10.8108
	10.1316
	12.2699
	10.4277
	11.4153
	10.4603
	10.3844
	9.55097
	9.56029
	10.8108
	12.2249
	11.2614
	9.17431
	9.43395
	10.3627
	11.3508
	11.3505
	10.3736
	10.7066
	11.1358
	11.2867
	9.79436
	11.1234
	10.101
	10.776
	10.7066
	12.0772
	13.3511

## Sheet: Ti
Trot 50cm/s (Treadmill)		Trot Air-Puff		Gallop Air-puff			Recap for making the graph	Treadmill	Air-puff	Air-puff
Average Ti times for each animal (ms)								Trot 50cm/s	Trot	Gallop
Animal 1	30.1755	Animal 1	25.6235	Animal 1	18.813		Animal 1	30.1755	25.6235	18.813
Animal 2	37.4865	Animal 2	24.2316	Animal 2	18.0162		Animal 2	37.4865	24.2316	18.0162
Animal 3	28.4932	Animal 3	27.05	Animal 3	17.0257		Animal 3	28.4932	27.05	17.0257
Animal 4	24.1237	Animal 4	27.2071	Animal 4	18.55		Animal 4	24.1237	27.2071	18.55
Animal 5	30.2911			Animal 5	19.1727		Animal 5	30.2911		19.1727
Animal 6	28.0164			Animal 6	19.93		Animal 6	28.0164		19.93
Animal 7	22.8393			Animal 7	25.2111		Animal 7	22.8393		25.2111
Mean	28.7751	Mean	26.0281	Mean	19.5313		Mean	28.7751	26.0281	19.5313
	4.79014	St Dev	1.39351	St Dev	2.66458		St Dev	4.79014	1.39351	2.66458
Individual Ti values for each animal
Animal 1	29.8	Animal 1	24.9	Animal 1	19.2
	27		21.8		21.8
	29.8		28.1		14.4
	33.6		22.4		13.4
	32.6		25.6		22.2
	35.4		20.7		21.1
	33.6		19.1		18.6
	28.9		25.6		16.5
	31.7		28.5		17.5
	27		26		17.5
	28.9		24.9		17.5
	36.2		24.4		16
	27		23.8		20.6
	32.6		28.9		17
	28.9		32.3		27.3
	28.9		32.8		18.9
	32.6		25.8		25.2
	24.1		28.6		11.9
	29.9		25.8		21
	31		21.1		21
	27.6		19.7		20.3
	32.2		24.5		14.9
	36.8		23.8		18.9
	26.4		35.4	Animal 2	21
	34.5		19.5		19.5
	49.4		25		17.6
	31		22		13.8
			20		12.2
			21.5		13
	33.3		20		20.2
	25.3		17.5		26.2
	31		25.9		22.9
	29.9		27.1		9.3
	21.3		25.3		22.4
	27.2		28.3		24.6
	28.4		29.4		19.1
	16.6		26		9.1
	28.4		34.1		20
	28.4		35.6		15.9
	30.8		33.4		15.3
	35.5		29.7		23.8
	28.4		28.9		14.4
	29.6		30.6		18.9
	26.1		27.2		13.9
	28.4		26.1		16.1
	25		22.1		19.4
	29.6		31.2		17.8
	39.1		23.3		15.4
	26.1		21		19.1
	32		18.7		9.6
	30.8	Animal 2	25.4		17.4
Animal 2			23.5		19.5
	24.1		23.5		17.4
	30.1		26.6		10.4
			28.2		32
	33.7		24.7		12.9
	32.5		27.3		23.3
	33.7		29.8		23.8
	30.1		28.1		17.6
	33.7		35.6		21.8
	26.5	Animal 3	27.2	Animal 3	19.6
	25.3		25.4		22.6
	32.5		21.4		23.7
	32.5		25.1		7.1
	30.1		31.4		15.4
	33.8		25.1		22.6
	28.9		27.9		13.1
	30.1		23.7		21.4
	25.3		35.4		19.6
	30.2		28.3		26.7
	35.6		33.6		14.8
	35.6		24.8		19.6
	31.3		28.3		14.3
	34.5		30.1		6.1
	35.6		35.4		20.4
	36.7		33.6		12.2
	35.6		24.8		11.5
	29.1		32.4		19.7
	33.3		30		19.6
	26.3		23.7		13.9
	31.2		23.7		19
	25.2		29.2		15.8
	34.3		30.8		15.8
	33.3		39.4		12.7
	28		32.7		10.8
	33.3		31.9		13.3
	27.2		30.5		27.9
	36.2		28.3		15.8
	36.2		26.1		13.9
	313		19.6		17.1
	32.5		26.1		20.3
	32.6		26.9		10.1
	35.4		31.2		19.6
	32.3	Animal 4	35.6		23.4
	32.5		33.9		16.5
	33.7		47.1	Animal 4	29.3
	32.5		34.7		7.7
	28.9		33.1		10.3
	37.4		30.4		28.3
	37.4		46.7		11.3
	33.7		33.5		15.9
	33.7		59.9		31.3
	33.4		28.8		12.3
	36.2		30.4		20
	32.5		22.8		13.4
Animal 3	38.3		26.1		18.6
	34		39.2		25.1
	38.3		43.1		20.2
	35.1		32.6		20.8
	33		26.8		21.3
	33		26.1		28.9
	33		33.9		13.1
	29.8		22		15.8
	31.9		30.9		20.2
	31.9		33.7		20.2
	30.8		32.3		12.2
	35.1		22.7		7.2
	34		35.8		18.4
	35.1		33		18.9
	32.1				20
	27.6				25.6
	37.2				26.2
	42.5				6.7
	30.6				17.8
	31.9				19.5
	34			Animal 5	19.2
	33				21.5
	37.2				15.8
	29.8				16.1
	33				19.7
	35.1				12.5
	23.4				21.5
	29.8				21.3
	29.8				19.6
	35.8				12.8
	26.9				11.2
	31.8				20.7
	28.9				12.7
	19.9				20.7
	22.9				17.5
	30.8				30.5
	29.8				24.4
	26.9				32.6
	25.9				18.8
	17.9				21.6
	24.9				15.1
	31.8				16
	23.1			Animal 6	25.3
	20.3				30.7
	22.2				25.1
	15.7				17.7
	24				19.2
	19.4				19.2
	24				13.6
	18.5				27.2
	20.3				22.6
	22.2				22.7
	28.6				13.3
	20.3				21
	24.9				11.2
	17.5				19.6
	21.2				14.4
	22.2				21.5
	22.2				19.7
Animal 4	22.6				16.1
	25.8				20.6
	25				17.9
	25			Animal 7	20.8
	21				20.8
	26.6				24.7
	18.6				26
	29.1				26
	16.2				19.6
	20.2				20.8
	21.8				31.9
	25				27.3
	28.3				29.9
	19.4				23.1
	18.6				23.2
	24.2				24.9
	21.8				24
	25				31.2
	21.8				23.5
	25.4				24.4
	28.9				24.4
	31.6				22.8
	23.7				25.9
	25.4				22.8
	22.8				24.8
	22.8				22.8
	24.6				28
	16.7				34.2
	21.5				27
	23.7				25.9
	28.9
	26.3
	33.3
	24.6
	38.6
	22
	21.9
	20.2
	17.5
	17.5
	11.1
	25.4
	27.8
	23.8
	26.2
	29.4
	25.4
	17.9
	19.8
	22.2
	23
	28.6
	27.8
	27.8
	25.4
	23.8
	30.9
	22.2
	30.9
Animal 5	29.7
	31.8
	31.8
	38.9
	31.8
	35.9
	36.9
	28.7
	36.9
	30.7
	27.7
	32.8
	41
	34.4
	32.8
	31.8
	26.6
	29.7
	31.8
	27.7
	36.9
	30.7
	29.7
	29.7
	32.8
	29.7
	30.7
	31.5
	20
	30.5
	30.5
	26.7
	14.3
	21
	31.5
	33.4
	26.7
	28.8
	19.1
	25.8
	24.8
	30.5
	30.5
	21.9
	31.5
	34.3
	31.5
	33.4
	26.7
	33.4
	35.3
	30
	29.6
	39.1
	29.6
	24.8
Animal 6	30.3
	23.8
	24.6
	27.5
	34.7
	29.6
	28.9
	24.6
	29.6
	30.3
	28.9
	31.5
	22.7
	22.7
	22.1
	23.3
	21.4
	26.5
	22.1
	23.3
	25.8
	27.3
	27.9
	34.8
	30.4
	32.9
	29.2
	24.2
	23.2
	26.1
	31.6
	23
	19.9
	23.4
	25.4
	32.3
	27.3
	24.8
	35.4
	36.6
	35.4
	27.6
	33.3
	36.5
	25.6
	26.3
	32.1
	22.4
	27.6
	30.6
	25
	28.3
	34.5
	26.5
	29.6
	34.5
	28.3
	27.7
	31.2
	30.2
	25.9
Animal 7	16.7
	21
	22.8
	22.2
	23.4
	23.4
	33.3
	32.5
	24.1
	27.4
	19.3
	24.9
	19.9
	9.9
	21.1
	21.8
	31.1
	28.6
	13.9
	23.9
	23.2
	21.3
	18.1
	23.2
	23.9
	26.5
	23.2
	12.6
	23.9
	21
	24
	22.8
	25.3
	21
	21.6
	31.3
	17.9
	31.4
	21.3
	17.3
	16.6
	31.8
	28.4
	22.2
	22.2
	22.2
	23.4
	21.6
	21
	24.4
	20.3
	20.8
	26
	20.3
	25.5
	20.3

## Sheet: Te
Trot 50cm/s (Treadmill)		Trot Air-Puff		Gallop Air-puff			Recap for making the graph	Treadmill	Air-puff	Air-puff
Average Te times for each animal (ms)								Trot 50cm/s	Trot	Gallop
Animal 1	77.5941	Animal 1	66.8647	Animal 1	55.513		Animal 1	77.5941	66.8647	55.513
Animal 2	74.4241	Animal 2	62.8421	Animal 2	47.4324		Animal 2	74.4241	62.8421	47.4324
Animal 3	67.3475	Animal 3	59.2722	Animal 3	56.0971		Animal 3	67.3475	59.2722	56.0971
Animal 4	69.9424	Animal 4	58.4357	Animal 4	51.9		Animal 4	69.9424	58.4357	51.9
Animal 5	71.2286			Animal 5	51.9318		Animal 5	71.2286		51.9318
Animal 6	62.3902			Animal 6	58.225		Animal 6	62.3902		58.225
Animal 7	70.8107			Animal 7	40.0296		Animal 7	70.8107		40.0296
Mean	70.5339	Mean	61.8537	Mean	51.5899		Mean	70.5339	61.8537	51.5899
	4.87106	St Dev	3.84854	St Dev	6.20307		St Dev	4.87106	3.84854	6.20307
Individual Te values for each animal
Animal 1	77	Animal 1	62.3	Animal 1	54.3
	75		74.8		50.9
	71.8		68.6		47.9
	76.4		69.8		42.8
	78.3		58.6		45.4
	81.1		56.5		45.9
	87.6		65.1		47.9
	84.8		66.7		51.5
	85.7		67.9		48.5
	77.4		66.3		64.4
	86.7		56.1		53.1
	77.4		62.3		56.2
	85		74.2		56.7
	83.9		70.8		55.7
	84.8		85		50.3
	73.6		71.9		74.8
	84.8		59.8		64.3
	81.6		64.6		61.5
	65.5		63.9		46.2
	62		66.6		62.2
	81.6		71.4		64.4
	74.7		62.6		63
	80.4		63.9		68.9
	68.9		46.4	Animal 2	35.1
	82.7		58.9		35.9
	85		61.4		43.6
	77		80.9		43.2
	74.7		74.4		48.9
	67.8		59.9		50.4
	89.6		60.4		57.7
	73.5		54.4		39.3
	82.7		48.3		47.5
	82		56.5		50.3
	74.6		64.2		46.4
	62.8		60.6		42.1
	84.1		74.7		52.4
	87.6		64.6		56.7
	87.6		60.1		40.4
	84.1		74.2		53.8
	78.2		80.2		63
	75		65		47.7
	64		49.9		42.2
	87.6		51.6		50.1
	66		52.2		52.1
	78.2		60.7		47.9
	79.4		63		46.3
	71.1		62.4		47.9
	86.5		55.6		37.8
	72.2		52.8		46.9
	64		56.7		54
	53.3	Animal 2	55.7		49
Animal 2	77.1		54.5		55.2
	77.1		51.4		50.2
	85.5		56.3		29.5
	78.3		57		46.9
	74.7		59.1		51.5
	65		50.5		39.9
	74.7		54.6		47.1
	80.7		67		54.2
	77.1		62		51.9
	54.2	Animal 3	44.5	Animal 3	46.3
	85.5		57.3		48.1
	78.3		53.8		48.7
	72.3		65.5		67.7
	77.1		69		68.9
	73.5		57.2		66.5
	59		58.6		59.4
	68.6		62		64.7
	66.2		49.6		47.5
	82		50.5		58.2
	84.2		49.6		71.8
	81		63.7		54.6
	78.8		53.1		72.7
	74.5		53.1		70
	77.7		56.7		50.9
	72.3		51.4		64.5
	86.4		62.9		70.6
	65.9		52.9		61.8
	69.6		53.7		42.4
	66.5		77.3		57.6
	70.6		63.1		41.2
	80.6		61.6		52.5
	80		62.3		54.4
	83.7		74.7		55.7
	77.6		68		37.4
	81.7		75.5		41.2
	68.5		51.5		37.4
	69.9		57.3		56.3
	83.1		63.1		62.7
	86.8		74		57
	92.8		65.3		54.4
	74.7		66		57
	78.3		52.3		61.4
	65.1	Animal 4	49.6		43.7
	74.7		52.1		58.2
	61.5		51.3	Animal 4	46.7
	67.5		56.2		45.7
	66.3		77.7		48.8
	72.3		48.3		41.6
	71.1		62.3		61.6
	62.7		53.7		62.7
	63.9		68.5		47.8
	75.9		47.5		44.7
	77.1		48.3		62.2
	68.7		54.2		26.7
Animal 3	79.8		36.5		46.4
	77.7		60.7		55.7
	92.5		54.8		60.1
	77.7		57.4		45.9
	69.1		54.8		59
	59.6		56.8		56.2
	64.9		63.3		54.1
	72.3		51.6		43.1
	83		50.2		60.1
	76.6		56.4		57.3
	68.1		53.6		66.8
	56.4		60.5		62.4
	81.9		48.8		59.6
	79.8		55		50.1
	74.5				52.3
	77.7				64
	70.2				47.9
	60.6				41.8
	72.3				44.5
	80.8				41.2
	69.1			Animal 5	31.7
	80.8				36.2
	65.9				53.2
	64.9				50.1
	69.1				46.5
	64.9				41.1
	79.8				62.6
	58.7				44.5
	67.7				46.4
	63.7				49.4
	68.7				49.5
	63.7				55.9
	58.7				65.5
	58.7				47.9
	61.7				59.1
	61.7				65
	70.6				42.7
	54.7				58.9
	61.7				53.7
	79.6				55.5
	75.6				58.4
	75.6				68.7
	64.7			Animal 6	61.4
	64.7				56
	63.7				59.1
	61				48.7
	57.3				57.5
	61.9				62
	51.7				48.3
	65.6				48.3
	72				63.4
	67.4				67.9
	50.8				68
	50.8				49.7
	52.6				62.3
	59.1				60.3
	56.3				56.5
	62.8				57.4
	60				62.8
Animal 4	63				59.2
	80.8				59.2
	87.2				56.5
	85.6			Animal 7	37.6
	79.9				37.6
	87.2				33.7
	89.6				41.5
	79.1				38.9
	71.1				38.4
	60.6				39.7
	61.4				34.6
	58.1				46.9
	58.9				50.8
	58.9				60.6
	61.4				36.5
	46.8				33
	58.1				40.1
	57.3				49
	50.9				32.6
	62.3				35
	58.8				38.2
	71				42.3
	67.5				32.1
	67.5				33.2
	85.1				34.2
	80.7				41.4
	78				42.4
	85.1				37.3
	84.2				46.6
	88.6				46.6
	85.1
	85.1
	77.2
	75.4
	78.9
	77.2
	78.1
	42.1
	80.9
	74.6
	76.2
	66.6
	71.4
	70.6
	54.7
	65.1
	63.5
	63.5
	76.2
	60.3
	61.1
	69.8
	61.1
	54
	65.1
	69
	68.2
	72.2
	58.7
Animal 5	72.7
	74.8
	72.7
	69.7
	91.2
	76.8
	75.8
	69.7
	84
	79.9
	76.8
	72.7
	69.7
	67.9
	67.6
	63.5
	69.7
	66.6
	63.5
	69.7
	73.8
	74.8
	56.3
	69.7
	78.9
	68.6
	65.6
	60.1
	63.9
	83
	77.3
	67.7
	99.2
	56.3
	74.4
	67.7
	62
	66.8
	66.8
	63
	76.3
	75.4
	71.5
	77.3
	69.6
	61
	63.9
	66.8
	77.3
	72.5
	70.6
	78.2
	62
	71.5
	71.5
	72.5
Animal 6	55.6
	54.9
	51.3
	57.1
	62.9
	54.2
	55.6
	69.4
	63.6
	60.7
	60.7
	58
	66.8
	58.6
	59.3
	56.1
	51.7
	51.7
	60.5
	71.2
	69.4
	67.6
	65.2
	65.2
	68.3
	65.8
	57.1
	73.2
	68.3
	63.3
	60.8
	60.8
	65.8
	59
	66.4
	63.3
	65.2
	75.1
	62.1
	55.9
	60.2
	62.8
	61.6
	62.2
	59
	55.1
	64.8
	76.3
	61.6
	72.4
	68.6
	67.8
	48.7
	70.2
	60.4
	61.6
	75.8
	62.2
	59.8
	54.2
	62.8
Animal 7	87.6
	67.9
	70.3
	76.5
	82.7
	82.7
	77.8
	72.8
	67.9
	59.7
	65.9
	62.8
	68.4
	75.2
	71.5
	75.2
	78.4
	63.4
	64.7
	71
	66.5
	74.2
	74.2
	70.4
	74.2
	56.1
	56.1
	81.3
	68.4
	84.5
	52.4
	75.2
	64.1
	75.2
	75.2
	76.5
	83.9
	64.7
	61
	70.3
	81.4
	83.9
	70.9
	61.7
	65.4
	66
	73.4
	74
	66.6
	79.5
	70.6
	77.4
	66.5
	68.6
	61.8
	50.9

## Sheet: Norm. Amplitude
Average values for each animal
Trot 50cm/s (Treadmill)			Trot Air-Puff			Gallop Air-puff				Recap for making the graph	Treadmill	Air-puff	Air-puff
	% CTRL Ampl	Amplitude		% CTRL Ampl	Amplitude		% CTRL Ampl	Amplitude			Trot 50cm/s	Trot	Gallop
Animal 1	157.377	0.455002	Animal 1	160.089	0.462844	Animal 1	148.253	0.428624		Animal 1	157.377	160.089	148.253
Animal 2	122.167	0.454406	Animal 2	146.472	0.544808	Animal 2	157.762	0.586803		Animal 2	122.167	146.472	157.762
Animal 3	125.438	0.524653	Animal 3	137.251	0.574063	Animal 3	154.188	0.6449		Animal 3	125.438	137.251	154.188
Animal 4	131.979	0.137571	Animal 4	215.406	0.563285	Animal 4	252.342	0.659873		Animal 4	131.979	215.406	252.342
Animal 5	133.916	0.498109				Animal 5	245.959	0.993656		Animal 5	133.916		245.959
Animal 6	134.498	0.592365				Animal 6	242.283	0.701545		Animal 6	134.498		242.283
Animal 7	146.616	0.638451				Animal 7	290.361	0.274215		Animal 7	146.616		290.361
Mean	135.999		Mean	164.804		Mean	213.021			Mean	135.999	164.804	213.021
St Dev	12.2156		St Dev	35.0142		St Dev	57.9921			St Dev	12.2156	35.0142	57.9921
Individual values for each animal
Animal 1		0.374164	Animal 1		0.433272	Animal 1		0.276803
		0.437077			0.583726			0.382657
		0.489599			0.460059			0.460936
		0.399949			0.47961			0.295705
		0.483876			0.526995			0.417935
		0.371232			0.448071			0.429193
		0.432293			0.431208			0.483914
		0.369766			0.170801			0.259113
		0.475877			0.594353			0.415661
		0.446992			0.635128			0.412279
		0.389635			0.593744			0.354411
		0.391217			0.510125			0.453386
		0.399641			0.395508			0.288565
		0.534404			0.633319			0.35943
		0.449886			0.507765			0.406585
		0.367554			0.411634			0.541115
		0.409865			0.440014			0.441741
		0.435135			0.486182			0.409012
		0.394548			0.344284			0.693116
		0.532732			0.432775			0.574997
		0.570143			0.506343			0.466015
		0.538584			0.32014			0.535849
		0.492801			0.395204			0.499932
		0.574232			0.439805	Animal 2		0.468246
		0.556408			0.251267			0.629778
		0.400747			0.444333			0.567953
		0.589536			0.562511			0.60872
		0.356842			0.469648			0.616359
		0.419844			0.48474			0.45119
		0.400927			0.365557			0.463846
		0.397892			0.364736			0.876634
		0.430608			0.432178			1.25604
		0.42432			0.528819			0.572671
		0.42949			0.487088			0.638895
		0.601689			0.345845			0.537953
		0.446542			0.435533			0.661319
		0.536667			0.528354			0.41428
		0.562118			0.415615			0.621021
		0.516863			0.465407			0.598461
		0.50678			0.404949			0.79081
		0.554389			0.350633			0.599006
		0.374486			0.461225			0.530744
		0.487297			0.437325			0.444245
		0.49599			0.716072			0.501966
		0.40103			0.547178			0.725733
		0.357562			0.565056			0.640545
		0.299523			0.487364			0.472435
		0.488403			0.472059			0.42156
		0.515654			0.519988			0.459587
		0.40746			0.418654			0.470404
		0.484815	Animal 2		0.561866			0.438083
Animal 2		0.35872			0.471529			0.587554
		0.486773			0.857534			0.294283
		0.458179			0.592284			0.917061
		0.315498			0.456128			0.777692
		0.5507			0.424538			0.480091
		0.350721			0.495693			0.629057
		0.442579			0.708656			0.542925
		0.610053			0.434506			0.474062
		0.540602			0.445344			0.530499
		0.40276	Animal 3		0.51809	Animal 3		0.845129
		0.568201			0.563753			0.600576
		0.515654			0.60762			0.908291
		0.531365			0.783764			0.782002
		0.432591			0.626118			0.584726
		0.483878			0.570528			0.590435
		0.462378			0.432889			0.653427
		0.479923			0.525448			0.671391
		0.423686			0.597404			0.558275
		0.398672			0.627574			0.665264
		0.548955			0.537519			0.446997
		0.398119			0.714286			0.717801
		0.545463			0.479721			0.728308
		0.6057			0.802468			0.341641
		0.447131			0.704763			0.721878
		0.4761			0.685776			0.478715
		0.334899			0.536619			0.339862
		0.502639			0.705926			0.23627
		0.401566			0.473672			1.35094
		0.456191			0.514038			0.894572
		0.531078			0.692049			0.704841
		0.464411			0.574537			0.774503
		0.379337			0.557323			0.754837
		0.46145			0.404177			0.708253
		0.35682			0.477082			0.486551
		0.371647			0.388438			0.491078
		0.438623			0.746821			0.845044
		0.346633			0.610511			0.439633
		0.381303			0.36575			0.647705
		0.57556			0.547099			0.731788
		0.261028			0.528615			0.608293
		0.302085			0.640585			0.624891
		0.436237			0.403104			0.534603
		0.534326	Animal 4		0.763781			0.455553
		0.489381			0.668606			0.647433
		0.397014			0.534826	Animal 4		1.08787
		0.496363			0.457786			0.684383
		0.510019			0.522709			0.684419
		0.424216			0.888584			0.692087
		0.537796			0.705715			0.69695
		0.403268			0.742562			0.560571
		0.517245			0.669198			0.732905
		0.522725			0.492977			0.706091
		0.387712			0.42714			0.551589
		0.481934			0.620878			0.705082
Animal 3		0.348749			0.579479			0.85346
		0.498977			0.38361			0.747057
		0.391257			0.572153			0.61625
		0.485612			0.58345			0.5773
		0.557935			0.480621			0.617759
		0.605247			0.645641			0.184697
		0.611553			0.702434			0.521748
		0.398476			0.382142			0.585693
		0.797848			0.494887			0.891007
		0.528443			0.395551			0.734862
		0.472033			0.75524			0.644532
		0.354573			0.369685			0.539238
		0.538667			0.42327			0.64825
		0.618799			0.382497			0.522662
		0.410955						0.78345
		0.491704						0.628277
		0.517815						0.87145
		0.456522						0.700729
		0.428479						0.39623
		0.514273						0.629606
		0.421421				Animal 5		1.28436
		0.498359						1.57027
		0.482902						1.48997
		0.373814						0.94386
		0.607581						1.06953
		0.472543						0.62266
		0.480809						0.551391
		0.640885						0.99269
		0.828146						0.8367
		0.510838						1.44887
		0.549213						1.54345
		0.46892						1.08123
		0.387957						1.0097
		0.523424						0.628957
		0.529918						0.653988
		0.489074						0.92492
		0.550528						1.05517
		0.422816						1.06311
		0.51371						0.728908
		0.516366						0.783273
		0.743881						1.0381
		0.381811						0.539326
		0.589789				Animal 6		0.491797
		0.468894						0.756729
		0.536279						0.77442
		0.560485						0.625292
		0.565718						0.579308
		0.485747						0.811873
		0.59682						1.04396
		0.518701						0.599988
		0.55713						0.565348
		0.597169						0.687073
		0.452497						0.738845
		0.693832						0.739145
		0.458052						0.824279
		0.677999						0.752431
		0.705774						0.657542
		0.436315						0.570505
		0.630499						0.731197
Animal 4		0.162514						0.652741
		0.0949732						0.731106
		0.103934						0.697323
		0.121506				Animal 7		0.253056
		0.174849						0.200021
		0.130605						0.28665
		0.149679						0.307062
		0.0922771						0.310356
		0.187868						0.359591
		0.157195						0.313391
		0.11213						0.2769
		0.146684						0.33979
		0.157747						0.272617
		0.148023						0.336616
		0.172114						0.338192
		0.187535						0.346455
		0.203696						0.298994
		0.144606						0.286057
		0.151034						0.256429
		0.14288						0.202172
		0.046895						0.248723
		0.107501						0.253205
		0.0745057						0.256429
		0.0983042						0.202172
		0.0736534						0.248723
		0.117933						0.253205
		0.153201						0.279707
		0.14967						0.250955
		0.106229						0.217786
		0.142803						0.208542
		0.134037
		0.120993
		0.146042
		0.155611
		0.0932256
		0.137064
		0.098956
		0.126302
		0.148327
		0.150194
		0.133506
		0.1406
		0.169414
		0.193205
		0.16344
		0.149366
		0.21551
		0.0769017
		0.138505
		0.139138
		0.164828
		0.129422
		0.154885
		0.188902
		0.109642
		0.14736
		0.10163
		0.144471
		0.132677
Animal 5		0.505069
		0.485032
		0.432284
		0.443942
		0.444285
		0.584783
		0.406207
		0.410015
		0.430131
		0.489354
		0.527074
		0.593679
		0.46064
		0.471002
		0.469441
		0.611017
		0.534533
		0.495378
		0.579696
		0.509657
		0.432081
		0.558644
		0.641339
		0.52286
		0.393535
		0.500341
		0.35605
		0.445908
		0.481224
		0.423545
		0.367115
		0.445409
		0.543397
		0.478633
		0.538403
		0.494114
		0.395018
		0.501246
		0.422609
		0.668945
		0.607755
		0.58945
		0.509423
		0.446688
		0.494036
		0.54733
		0.469363
		0.454554
		0.559611
		0.525419
		0.395954
		0.567758
		0.504835
		0.452665
		0.656757
		0.618866
Animal 6		0.476772
		0.445918
		0.503544
		0.671452
		0.718556
		0.819906
		0.858769
		0.461712
		0.648165
		0.624806
		0.83182
		0.503655
		0.567023
		0.614929
		0.475242
		0.646155
		0.580269
		0.465947
		0.677805
		0.657209
		0.659026
		0.64204
		0.626542
		0.616601
		0.593793
		0.647481
		0.474708
		0.61563
		0.727849
		0.423448
		0.443161
		0.456146
		0.60033
		0.519835
		0.510396
		0.696712
		0.544639
		0.451267
		0.522179
		0.527095
		0.694417
		0.48826
		0.519359
		0.774121
		0.599151
		0.628485
		0.602396
		0.442723
		0.795059
		0.684335
		0.640699
		0.681315
		0.415291
		0.40944
		0.616156
		0.594051
		0.559367
		0.672079
		0.533709
		0.783471
		0.451845
Animal 7		0.651098
		0.344905
		0.504035
		0.805727
		0.730901
		0.709611
		0.526224
		0.8658
		0.601358
		1.00272
		0.790208
		0.689877
		0.630601
		0.682562
		0.571072
		0.654212
		0.651488
		0.64035
		0.464495
		0.54027
		0.697254
		0.557507
		0.545219
		0.743825
		0.8356
		0.593869
		0.696072
		0.515211
		0.584368
		0.740054
		0.752956
		0.615322
		0.745734
		0.531807
		0.593184
		0.750363
		0.371611
		0.504583
		0.95839
		0.755988
		0.477094
		0.541087
		0.502644
		0.767957
		0.670449
		0.507354
		0.623243
		0.620285
		0.86077
		0.566533
		0.686477
		0.324303
		0.505672
		0.757759
		0.410635
		0.784544
