# Supplementary material for: Absent phasing of respiratory and locomotor rhythms in running mice
Source: eLife. 2020 Dec 1;9:e61919. doi: 10.7554/eLife.61919 (PMC7707822; doi:10.7554/eLife.61919)
Supplement: Figure 5—source data 1. [file elife-61919-fig5-data1.xlsx]

## Sheet: Flat 25cms
	HL			FL
	sin	cos		sin	cos
	121	42		122	42
Animal1	0	1		0.513242	0.858244
	0.656423	-0.754393		0.0530331	-0.998593
	-0.999381	-0.0351753		-0.678416	0.734678
	0.527429	0.849599		0.961663	0.274234
	0.360422	-0.93279		-0.269374	-0.963036
	-0.999906	-0.013702		-0.579995	0.81462
	0.999556	0.0297978		0.99204	0.125926
	-0.909137	-0.416497		-0.99482	-0.101648
	0.80106	0.598584		0.774605	0.632445
	-0.178358	-0.983966		-0.808653	-0.588286
	0.437678	-0.899132		0.339058	0.940765
	-0.873548	0.486737		-0.676403	-0.736532
	0.980534	-0.196349		0.919441	0.393229
	-0.679366	-0.7338
	0.144343	0.989528		0.964619	0.263648
	0.434587	-0.90063		-0.997776	-0.066651
	-0.472338	0.881418
	0.322831	-0.946457		0.870572	0.492041
	-0.459399	0.88823		-0.358475	-0.933539
				-0.349903	0.936786				HL				HL
									sin	cos	R		sin	cos	R
				0.114129	-0.993466			Animal1 mean	-0.0272949	-0.0138121	0.0305906		0.0354731	0.0644573	0.0735737
	-0.784088	0.62065						Animal2 mean	-0.00918208	-0.0412517	0.0422613		0.0289828	-0.00136503	0.0290149
								Animal3 mean	-0.026929	-0.0560102	0.0621475		0.130632	-0.0419429	0.1372
	0.744472	-0.667654		0.299401	0.954127
	-0.929886	0.367848		0.078428	-0.99692
				-0.603599	0.797288
	0.99961	0.0279275		0.630354	-0.776308
	-0.953972	-0.299895		-0.463982	0.885845
	0.928426	0.371516		0.518901	-0.854835
	-0.960719	-0.277523		-0.179849	0.983694
	0.971923	0.2353		0.618003	-0.786175
	-0.931226	-0.364443		-0.378909	0.925434
	0.827193	0.561918		0.879474	-0.475947
	-0.987976	0.154606		-0.975796	0.218681
	0.951057	-0.309017		0.883169	0.469055
	-0.997063	0.0765858		-0.762568	-0.646908
	0.926582	0.376093		0.408567	0.912728
	-0.551154	-0.834404		-0.181866	-0.983323
	0.0414522	0.99914		0.280184	0.959946
	0.473643	-0.880717		0.283022	-0.959113
	-0.956374	0.292144		-0.59399	0.804472
	0.935709	0.352772		0.999913	-0.0131785
	-0.438142	-0.898906		-0.725713	-0.687998
	-0.334827	0.942279
	0.719647	-0.69434		0	1
	-0.934102	0.357006		0.167422	-0.985885
				-0.479281	0.877662
Animal2	0.931968	0.36254		0.997766	-0.0668073
	-0.0131554	-0.999913		-0.584658	-0.81128
	-0.807157	0.590337		-0.376466	0.92643
	0.968317	0.249725		0.986689	-0.162618
	-0.0581668	-0.998307		-0.688191	-0.725529
	-0.872097	0.489334		-0.401044	0.916059
	0.86581	0.500372		0.962138	-0.272561
	0.303249	-0.952911		-0.916184	-0.400757
	-0.981732	0.190268
	0.791306	0.611421		0	1
	0.10084	-0.994903		0.838646	-0.544677
	-0.961226	0.27576		-0.989108	-0.147191
	0.989047	0.147598		0.897279	-0.441465
	-0.0117464	-0.999931		-0.975957	0.217963
	-0.974469	0.22452
	0.687931	0.725776		0.531586	0.847004
	0.282885	-0.959154		0.798191	-0.602404
	-0.994346	0.106193		-0.866025	-0.5
	0.819703	0.572789		0	1
	-0.412379	-0.911013		0.969925	-0.243405
	-0.426205	0.904627		-0.826751	-0.562568
	0.978186	-0.20773		0.270801	0.962635
	-0.944474	-0.328586		0.117984	-0.993015
				-0.396692	0.917952
	0.867914	0.496715		0.993832	-0.110894
	0.0366248	-0.999329		-0.838802	-0.544436
	-0.963852	0.266437		-0.219331	0.97565
	0.677542	0.735484		0.986452	-0.164053
	-0.026871	-0.999639		-0.697454	-0.716629
	-0.957789	0.287471
	0.85795	0.513734		0.221332	0.975198
	-0.64611	-0.763244		0.932486	-0.361206
				-0.846599	-0.532231
	0.259079	0.965856		0.46806	0.883697
	-0.00647079	-0.999979		-0.409323	-0.912389
	0	1		0.108292	0.994119
	0.573549	-0.819171		0.571335	-0.820717
	-0.990682	-0.136193		-0.911999	0.410192
	0.216178	0.976354		0.880256	0.474498
	0.471473	-0.881881		-0.109644	-0.993971
	-0.988723	0.149757		-0.546795	0.837267
				0.992878	-0.119134
				-0.76559	-0.643329
Animal3	0.71443	0.699707		0.61358	0.789632
	-0.444967	-0.895547		-0.0821003	-0.996624
				-0.285183	0.958473
	0	1		0.859731	-0.510747
	0.553474	-0.832866		-0.998735	0.0502788
	-0.90622	0.422806
	0.999546	-0.0301357		0.969505	0.245071
	-0.931531	-0.363663		-0.954829	-0.297155
	0.881738	0.471739		0.96839	0.249441
	-0.746795	-0.665054		-0.774874	-0.632115
	0.0888874	0.996042		0.45933	0.888266
	0.216609	-0.976258		-0.274574	-0.961566
	-0.56758	0.823318
	0.474175	-0.880431		0	1
				0.0395563	-0.999217
	0	1		0.643045	0.765828
	-0.601034	-0.799223		-0.971963	-0.235136
	0.961449	0.274983		0.899863	-0.436173
	-0.989594	0.14389
	0.0977404	-0.995212		0.999006	0.044582
	0.245193	-0.969474		0	1
				-0.0446054	-0.999005
	0.568682	0.822557		0.976833	0.214004
	-0.505221	-0.86299		-0.965405	0.260756
	0.443585	0.896232		0.75575	-0.654861
	-0.405891	-0.913921
	0.45033	-0.892862		0.662439	-0.749116
	-0.605748	0.795657
	0.32576	-0.945452		0.834365	-0.551212
	-0.837342	0.54668
	0.20335	-0.979106		0.382127	0.92411
	-0.437523	0.899207		-0.60839	-0.793639
	0.530401	-0.847747		0.50787	0.861433
	-0.821991	0.569501		0.245593	-0.969373
	0.993402	0.114683		0	1
	-0.976084	-0.217395		0.567613	-0.823295
				-0.299509	0.954093
	0.822309	0.569041		0.612015	-0.790846
	-0.973537	-0.228531		-0.995354	0.0962842
	0.995345	0.0963795		0.983386	0.181529
	-0.990047	0.140735		-0.941437	-0.33719
	0.766856	-0.641819		0.990943	-0.13428
				-0.835067	0.550148
	0.149042	0.988831		0.930898	-0.36528
	-0.818357	-0.574711		-0.865796	0.500398
				0.221255	-0.975216

## Sheet: Flat 50cms
	HL			FL
	sin	cos		sin	cos
	113	40		109	38
Animal1	0.737319	-0.675544		0.0951535	-0.995463
	0.343622	0.939108
	-0.987395	0.158275
	0.666769	-0.745264		0	1
				-0.889109	-0.457695
	0.790641	0.61228		0.761236	-0.648475
	-0.854855	0.518868
	0.03325	-0.999447		0.224571	0.974458
				-0.999302	-0.0373642
	0.855695	0.517481		0.272566	-0.962137
	-0.770069	0.63796
	0.579363	-0.815069		0.946494	0.322721
				-0.550179	0.835047
	0.434652	0.900599		0.813658	-0.581344
	-1	-0.000994804		-0.251325	0.967903
									HL				HL
									sin	cos	R		sin	cos	R
	0.619252	-0.785193		-0.884394	-0.466741			Animal1 mean	0.0253258	0.0622593	0.0672132		0.0166714	0.0155908	0.0228256
								Animal2 mean	-0.0203885	0.036837	0.0421029		0.0171646	0.0261841	0.0313087
								Animal3 mean	0.00214618	0.0992346	0.0992578		0.0187892	-0.24946	0.250167
	0.81332	0.581817		0.833017	-0.553248
	-0.815906	0.578184
	-0.383471	-0.923553		0	1
				-0.915345	-0.40267
	0.983785	-0.179354		0.683425	-0.73002
	-0.639693	0.76863
	-0.201659	-0.979456		0.991512	0.130013
	0.991048	-0.133508		0	1
	-0.565334	0.824862		-0.806028	0.591877
	0.421432	0.90686		0.161851	-0.986815
	-0.999818	0.0190592
	0.705051	-0.709156		0.471606	0.881809
				-0.891752	-0.452524
	0.360992	0.932569		0.773102	-0.634282
	-0.992709	-0.120537
	0.619252	-0.785193		-0.167709	-0.985836
	0.559866	0.828583		0.931968	0.36254
	-0.908525	0.41783		-0.80915	0.587603
	0.265281	-0.964171		-0.899272	-0.43739
	0.544273	0.838908		0.893648	-0.448768
	-0.993355	0.115087		-0.679329	0.733834
	0.735413	-0.677619		-0.644965	-0.764212
	0	1		0.988901	-0.148574
	-0.863112	-0.505012		-0.391849	0.920029
	0.920036	-0.391833		-0.186205	-0.982511
	-0.578572	0.815631
	-0.872417	-0.488762		0.720874	0.693067
				-0.91548	0.402364
	0.897133	-0.44176		0.726534	-0.687131
	-0.437523	0.899207
				0.726389	0.687284
				-0.501596	0.865102
Animal2	0.30595	0.952048		0.934627	0.35563
	-0.403385	-0.91503		-0.954802	0.297241
	0.50061	0.865673		0.945659	-0.32516
	-0.999819	-0.019026		-0.945659	0.32516
	0.916363	-0.400349		0.181148	-0.983456
	-0.755472	0.65518
	0.588372	-0.808591		0.461093	0.887352
	-0.173152	0.984895		-0.960897	-0.276906
	-0.442731	-0.896654		0.999891	-0.0147533
				-0.671126	0.741343
	0.970284	0.241968		-0.482811	-0.875724
	-0.912697	0.408637
	0.287881	-0.957666		0.872721	0.48822
				-0.984013	-0.178094
	0.386267	0.922387		0.689118	-0.72465
	-0.966592	-0.256318
	0.956923	-0.290342		0.705685	0.708526
	-0.745025	0.667036		-0.999992	0.00401737
	-0.509483	-0.860481		0.591863	-0.806038
	0.959786	-0.280732		0.530204	0.84787
	-0.416363	0.909199		-0.551377	0.834256
	-0.666012	-0.745941		-0.227354	-0.973812
	0.861182	-0.508297		0.92961	-0.368545
	0.231708	0.972785		0	1
	-0.993046	-0.117726		-0.896669	-0.442703
	0.0672254	-0.997738		0.596081	-0.802924
	0.898696	0.438572		0.235759	0.971812
	-0.839332	0.543619		-0.902306	-0.431097
	-0.00309705	0.999995		0.977111	-0.212732
	0.808072	0.589084		0.616049	0.787708
	-0.768579	0.639755		-0.98103	-0.193857
	-0.252627	-0.967564		0.937472	-0.348061
	0.969556	0.24487		0	1
	-0.998526	0.0542774		-0.320714	-0.947176
	-0.082452	-0.996595		0.754702	0.656067
				-0.981188	-0.193055
	0.980887	0.194579		0.941917	-0.335847
	-0.966819	0.255464		-0.9694	0.245485
	0.472822	-0.881158		0.717213	-0.696854
				-0.474861	0.880061
	0.365854	0.930672		-0.0330634	-0.999453
	-0.657531	-0.753427
	0.999046	0.0436771		0.38078	0.924666
	-0.790283	0.612743		-0.974853	0.222849
Animal3	-0.995951	-0.0898955		0.4532	-0.891409
	-0.926435	-0.376455		0.9935	-0.113833
	0.40443	-0.914569		0.971973	0.235093
				-0.302561	0.95313
	0.979234	0.202736		-0.934223	-0.356691
	0.200539	0.979686		-0.331418	-0.943484
	0	1		0.196379	-0.980528
	-0.781831	0.62349
	-0.812326	-0.583204		0.897372	-0.441274
	0.604101	-0.796908		0.752012	0.65915
				-0.494571	0.869138
	0.997993	0.0633231		-0.999875	0.0157862
	0.34829	0.937387		-0.441631	-0.897197
	0	1		-0.170778	-0.985309
	-0.65478	0.75582
	-0.995213	-0.0977272		0.361914	-0.932211
	-0.0889321	-0.996038		0.999598	-0.0283429
	0.597362	0.801971		-0.77306	-0.634333
	-0.186393	0.982475
	-0.569434	0.822037		0.0622106	-0.998063
	-0.861906	-0.507068		0.599728	-0.800204
	0.659281	-0.751897		0.816464	0.577397
	0.675496	0.737364		-0.845973	-0.533226
	-0.101168	0.994869
	-0.962274	-0.272084		-0.0504556	-0.998726
	0.521435	-0.853291		0.999456	0.0329796
	0.972296	-0.233752		0	1
				-0.762887	0.646532
	0.960754	-0.277403		-0.913972	0.405778
	0.878726	0.477327		-0.933238	-0.359259
	0.0462452	0.99893		-0.0229598	-0.999736
	-0.820957	-0.57099
	0.783482	-0.621414		0.84108	0.540911
	0.977555	0.210679		-0.993974	-0.109618
	-0.974643	0.223766		-0.129454	-0.991585
	-0.804153	-0.594423		0.738607	-0.674136

## Sheet: Air-puff Gallop
	HL			FL
	sin	cos		sin	cos
	83	25		91	25
Animal1	0.788485	-0.615053		0.84444	0.535651
				-0.929508	0.368803
	-0.989212	0.146491		-0.0056605	-0.999984
	-0.889929	-0.456099		0.808165	-0.588956
	0.370691	-0.928756
	-0.920852	-0.389912		-0.772139	-0.635453
	0.890687	-0.454618		0.968915	0.247395
	-0.72594	0.687758		-0.814482	0.580189
	-0.923216	-0.384281		0.220676	-0.975347
	0.136922	-0.990582		0.550293	0.834972
				-0.999987	-0.00506706
									HL				HL
									sin	cos	R		sin	cos	R
	0.209177	0.977878		-0.921101	-0.389324			Animal1 mean	0.0318169	-0.047763	0.0573901		-0.100644	-0.00459293	0.100749
	-0.514734	-0.85735						Animal2 mean	0.146921	-0.118197	0.188564		-0.0014575	0.00313693	0.00345899
								Animal3 mean	-0.257708	-0.138574	0.292602		0.0365984	0.156678	0.160896
	-0.792754	-0.609542		0.8475	0.530795
	-0.470746	0.882269
	-0.794123	0.607757		0.42395	0.905686
				0.978181	-0.207755
	-0.428556	0.903515		0.154691	0.987963
	0.830557	-0.556934		-0.391454	-0.920198
	0.822984	0.568065		0.918852	-0.394603
	-0.232305	-0.972643		-0.974715	-0.223451
	0.997457	0.071264		0.392128	0.919911
				-0.999977	-0.0068295
	0.430302	0.902685		-0.999859	-0.0167992
	0.836967	-0.547254		0.902798	0.430065
	0.991716	-0.128446		-0.770184	-0.637822
	0.985726	0.168357		-0.973311	-0.229488
	-0.797827	0.602887
	0.983946	0.178468		-0.974318	-0.225175
Animal2	0	1		0.65706	-0.753838
	-0.0553523	-0.998467		-0.0640702	0.997945
	0.289609	0.957145		0.723282	0.690553
	-0.637772	-0.770225		-0.598716	0.800961
	-0.454299	-0.890849		0.969829	-0.243787
				-0.536052	0.844185
	-0.65121	-0.758897		-0.891615	-0.452794
	0.846415	-0.532524		-0.606682	-0.794944
				-0.132663	-0.991161
	0.988032	0.154249		-0.827828	-0.560982
	0.315911	0.948789		0.46687	-0.884326
	-0.705272	-0.708937
	0.999746	-0.0225454		0.981077	-0.193616
	-0.998102	0.0615903		-0.873932	-0.486048
	0.981836	-0.189734		0.580822	0.814031
	-0.968097	0.250575		-0.467319	0.884089
	0.356511	-0.934291		-0.430486	-0.902597
	0.98618	0.165675		0.957488	0.288474
	-0.165675	0.98618		-0.160752	0.986995
	-0.294615	-0.955616		0.626998	-0.779021
				-0.426392	0.904538
	0.997818	0.0660198		-0.888418	-0.459035
	-0.466559	0.88449
	0.941069	0.338214		0.997688	-0.0679647
	-0.922438	-0.386145		-0.608814	-0.793313
				-0.178287	0.983979
	0.447174	0.894447		0.765737	0.643154
	-0.999941	0.0109081		-0.995919	0.0902516
	0.563437	-0.826159		0.18047	-0.983581
	0.699982	-0.714161		0.420874	0.907119
				-0.953743	0.300622
	0.868608	0.495499		-0.546216	-0.837644
	-0.775051	-0.631899		0.507596	-0.861595
	0.542546	-0.840026		0.784867	0.619664
				-0.315836	0.948814
	0.839238	-0.543765		0.833531	-0.552473
	0.984808	-0.173648
Animal3	-0.844469	0.535605		0.199376	0.979923
	0.28517	0.958477		-0.993504	-0.113799
	-0.530192	-0.847878		0.714743	-0.699387
				-0.134711	0.990885
	0.124849	-0.992176
				-0.21873	-0.975785
	-0.669526	-0.742789		0.889872	0.456211
	0.38099	0.924579		0.999969	-0.00784083
				-0.857182	0.515013
				-0.0194634	-0.999811
	-1	6.15009e-10		0.864924	-0.501902
	-0.637223	-0.770679
	0.537957	0.842973		-0.448663	-0.893701
	-0.532032	0.846724
	-0.462822	0.886451		0.451768	-0.892136
	-0.801757	-0.59765		0.719233	0.694769
	-0.995104	-0.0988381		0.562868	0.826547
	-0.625762	-0.780014		0.24772	0.968832
				8.20414e-10	1
	-0.779691	-0.626165		0	1
				-0.357831	0.933786
	-0.881488	-0.472206		-0.210913	0.977505
	-0.728103	-0.685468		-0.900287	0.435297
	-0.575319	-0.817929		-0.176273	0.984341
	-0.395383	-0.918516		0.340829	0.940125
				-0.80124	0.598344
	0.474576	-0.880214		-0.0683909	0.997659
	0.743931	-0.668256
	-0.999812	0.0193913		0.0207009	-0.999786
	-0.0920708	-0.995752		0.659968	0.751293
				-0.895033	0.446
	0.895469	-0.445123		0.242336	-0.970192
	0.638287	0.769798		0.87017	-0.492752
				-0.997927	-0.0643617
	0.577573	0.816339		-0.0233183	-0.999728
	-0.0661601	0.997809		0.490138	-0.871645
